# Supplementary material for: Rh(iii)-Catalyzed olefination to build diverse oxazole derivatives from functional alkynes
Source: Royal Society of Chemistry journal article supplement (doi:10.1039/d1ob00507c), 2021-01-01

## Supporting Information

# Rh(III)-Catalyzed Olefination to Build Diverse Oxazole Derivatives from Functional Alkynes

Yuan He, Ting Zheng, Yin-Hui Huang and Lin Dong\*

*Key Laboratory of Drug-Targeting and Drug Delivery System of the Education Ministry, Sichuan Research Center for Drug Precision Industrial Technology, West China School of Pharmacy, Sichuan University, Chengdu 610041, China*

*dongl@scu.edu.cn*

## Table of Contents

|                                                                               |           |
|-------------------------------------------------------------------------------|-----------|
| <b>1. General Information.....</b>                                            | <b>2</b>  |
| <b>2. Material.....</b>                                                       | <b>2</b>  |
| <b>3. General Procedure for the Synthesis of Oxazole Derivatives.....</b>     | <b>3</b>  |
| <b>4. Optimization of the Reaction Conditions .....</b>                       | <b>3</b>  |
| <b>5. Synthetic Applications .....</b>                                        | <b>5</b>  |
| <b>6. Mechanism Study.....</b>                                                | <b>7</b>  |
| <b>7. References .....</b>                                                    | <b>11</b> |
| <b>8. X-ray Data of Compound 3aa and Sample Preparation.....</b>              | <b>11</b> |
| <b>9. Characterization Data and NMR Spectra of Oxazole Derivatives</b>        | <b>19</b> |
| <b>10. <sup>1</sup>H, <sup>13</sup>C and <sup>19</sup>F NMR spectra .....</b> | <b>33</b> |

## 1. General Information

All reactions were carried out in high-pressure reaction tube. Column chromatography was performed with silica gel (200–300 mesh). High-resolution mass spectra (HRMS) were obtained with a Waters-Q-TOF-Premier (ESI).  $^1\text{H}$  NMR and  $^{13}\text{C}$  NMR spectra were recorded on a Bruker 400 MHz and 100MHz instrument. Spectra were reported relative to  $\text{Me}_4\text{Si}$  ( $\delta$  0.0 ppm),  $\text{CDCl}_3$  ( $\delta$  7.26 ppm).  $^{13}\text{C}$  NMR were reported relative to  $\text{CDCl}_3$  ( $\delta$  77.16 ppm). Splitting patterns are designated as follows: s, singlet; d, doublet; t, triplet; q, quartet; m, multiplet. Compounds were characterized by  $^1\text{H}$  NMR,  $^{13}\text{C}$  NMR,  $^{19}\text{F}$  NMR and HRMS.

## 2. Material

Unless otherwise noted, all reagents were obtained from commercial suppliers and used without further purification. Solvents were dried over sodium (for THF and ether) and  $\text{CaH}_2$  (for toluene, DCM and DCE) by refluxing for overnight and freshly distilled prior to use. Methanol was dried and distilled from magnesium powder under nitrogen atmosphere. 2-aryloxazoles was prepared following literature procedures<sup>[1]</sup>. Alkynes were purified by column chromatography (petroleum ether) before each used.

### General Procedure A for the Synthesis of Alkynes<sup>[2]</sup>

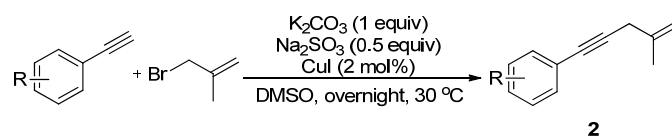

To a solution of the allylic halide (1.5 equiv),  $\text{Na}_2\text{SO}_3$  (0.5 equiv),  $\text{CuI}$  (2 mol%),  $\text{K}_2\text{CO}_3$  (1 equiv) and 1 drop of DBU in DMSO, alkyne derivatives (1 equiv) were added and stirred at 30 °C overnight. After acidic work up, the mixture was quenched with water and extracted with dichloromethane ( $3 \times 20$  mL), the combined organic layer was washed with saturated aqueous  $\text{NaHCO}_3$  and brine, then the combined organic layers were dried ( $\text{MgSO}_4$ ), filtered, and concentrated in vacuo. Purification of the residue by column chromatography (petroleum ether) afforded the product **2**.

### General Procedure B for the Synthesis of Alkynes<sup>[3]</sup>

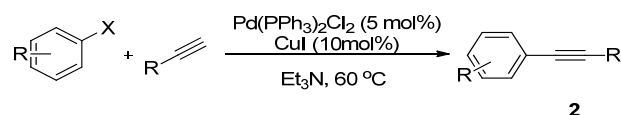

A mixture of the  $\text{Pd}(\text{PPh}_3)_2\text{Cl}_2$  (5 mol%),  $\text{CuI}$  (5 mol%), aryl halide or bromide (1.0 equiv), Degassed  $\text{Et}_3\text{N}$  and alkyne derivatives (1.1 equiv) were added and stirred at 60 °C overnight under Ar atmosphere. The mixture was quenched with aqueous saturated  $\text{NH}_4\text{Cl}$  and extracted with  $\text{EtOAc}$  ( $3 \times 20$  mL), the combined organic layer was washed with brine and then the combined organic layers were dried ( $\text{MgSO}_4$ ), filtered, and concentrated in vacuo. Purification of the residue by column chromatography (petroleum ether) afforded the product **2**.

### General Procedure B for the Synthesis of Alkynes<sup>[4]</sup>

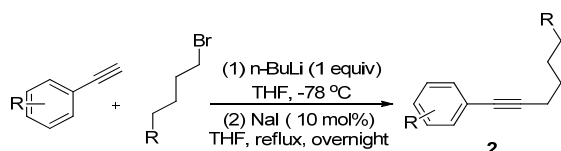

A mixture of alkyne (1.0 equiv) in THF (0.25 M) was cooled to  $-78\text{ }^{\circ}\text{C}$  and a solution of *n*-BuLi (1.0 equiv, 1.6 M in hexanes) was added. The reaction mixture was allowed to warm to room temperature. Then NaI (0.1 equiv.) and the corresponding bromoethylbenzene (1.2 equiv) were added. The mixture was heated to reflux. The reaction mixture was cooled to room temperature and quenched by addition of ammonium chloride solution. After completion of the reaction, extracted with EtOAc ( $3 \times 20\text{ mL}$ ), the combined organic layer was washed with brine and then the combined organic layers were dried ( $\text{MgSO}_4$ ), filtered, and concentrated in vacuo. Purification of the residue by column chromatography (petroleum ether) afforded the product **2**.

### 3. General Procedure for the Synthesis of Oxazole Derivatives

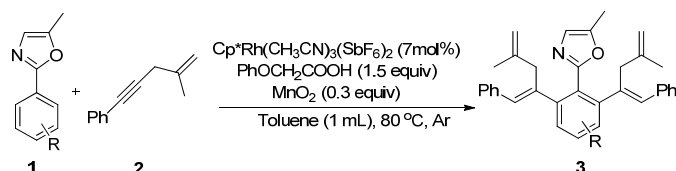

A mixture of 2-aryloxazolines **1** (0.1 mmol), acetylene derivatives **2** (2.5 equiv),  $\text{Cp}^*\text{Rh}(\text{CH}_3\text{CN})_3(\text{SbF}_6)_2$  (7 mol%),  $\text{PhOCH}_2\text{COOH}$  (1.5 equiv), and  $\text{MnO}_2$  (0.3 equiv) were added to an oven dried high pressure tube under Ar atmosphere. Toluene (1 mL) was then added by syringe. The reaction mixture was stirred at  $80\text{ }^{\circ}\text{C}$  until raw materials disappear (monitored by TLC). After removal of the volatiles under vacuum, the crude product was purified by column chromatography on silica gel afforded the pure product **3**.

### 4. Optimization of the Reaction Conditions

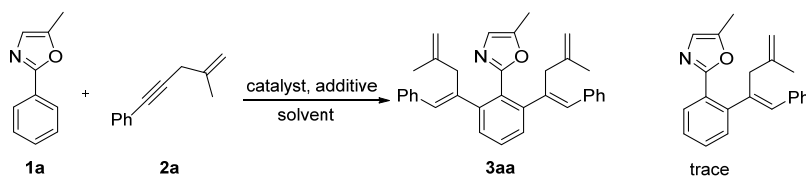

**Table S1. The effect of catalysts on the reaction<sup>a</sup>**

| Entry          | Catalyst                                                       | Acid                        | Yield |
|----------------|----------------------------------------------------------------|-----------------------------|-------|
| 1              | $[\text{Cp}^*\text{IrCl}_2]_2$                                 | $\text{PhOCH}_2\text{COOH}$ | ND    |
| 2              | $[\text{RuCl}_2(\text{p-cymene})]_2$                           | $\text{PhOCH}_2\text{COOH}$ | ND    |
| 3              | $\text{Cp}^*\text{Rh}(\text{CH}_3\text{CN})_3(\text{SbF}_6)_2$ | $\text{PhOCH}_2\text{COOH}$ | 56%   |
| 4              | $[\text{Cp}^*\text{RhCl}_2]_2$                                 | $\text{PhOCH}_2\text{COOH}$ | ND    |
| 5 <sup>b</sup> | $[\text{Cp}^*\text{RhCl}_2]_2$                                 | $\text{PhOCH}_2\text{COOH}$ | 27%   |
| 6              | $\text{Cp}^*\text{Rh}(\text{OAc})_2 \cdot \text{H}_2\text{O}$  | $\text{PhOCH}_2\text{COOH}$ | 28%   |
| 7              | $\text{Cp}^*\text{Co}(\text{CO})\text{I}_2$                    | $\text{PhOCH}_2\text{COOH}$ | ND    |

<sup>a</sup>Reaction conditions: **1a** (0.05 mmol), **2a** (2.5 equiv), catalyst (8 mol%),  $\text{PhOCH}_2\text{COOH}$  (1.5 equiv), toluene

(0.5 mL), 100 °C, 24 h under Ar. <sup>b</sup>AgSbF<sub>6</sub> (20 mol%) was added.

**Table S2. The effect of solvents on the reaction<sup>a</sup>**

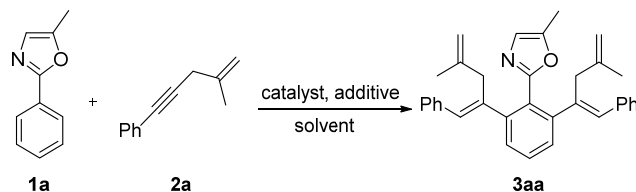

| Entry | Catalyst                                                                | Solvent            | Yield |
|-------|-------------------------------------------------------------------------|--------------------|-------|
| 1     | Cp*Rh(CH <sub>3</sub> CN) <sub>3</sub> (SbF <sub>6</sub> ) <sub>2</sub> | DCE                | 42%   |
| 2     | Cp*Rh(CH <sub>3</sub> CN) <sub>3</sub> (SbF <sub>6</sub> ) <sub>2</sub> | DCM                | 50%   |
| 3     | Cp*Rh(CH <sub>3</sub> CN) <sub>3</sub> (SbF <sub>6</sub> ) <sub>2</sub> | Toluene            | 56%   |
| 4     | Cp*Rh(CH <sub>3</sub> CN) <sub>3</sub> (SbF <sub>6</sub> ) <sub>2</sub> | CH <sub>3</sub> OH | 22%   |
| 5     | Cp*Rh(CH <sub>3</sub> CN) <sub>3</sub> (SbF <sub>6</sub> ) <sub>2</sub> | CH <sub>3</sub> CN | 10%   |
| 6     | Cp*Rh(CH <sub>3</sub> CN) <sub>3</sub> (SbF <sub>6</sub> ) <sub>2</sub> | THF                | 36%   |
| 7     | Cp*Rh(CH <sub>3</sub> CN) <sub>3</sub> (SbF <sub>6</sub> ) <sub>2</sub> | 1,4-Dioxane        | 19%   |
| 8     | Cp*Rh(CH <sub>3</sub> CN) <sub>3</sub> (SbF <sub>6</sub> ) <sub>2</sub> | Chlorobenzene      | 54%   |

<sup>a</sup>Reaction conditions: **1a** (0.05 mmol), **2a** (2.5 equiv), Cp\*Rh(CH<sub>3</sub>CN)<sub>3</sub>(SbF<sub>6</sub>)<sub>2</sub> (8 mol%), PhOCH<sub>2</sub>COOH (1.5 equiv), solvent (0.5 mL), 100 °C, 24 h under Ar.

**Table S3. The effect of acids, additives and temperature on the reaction<sup>a</sup>**

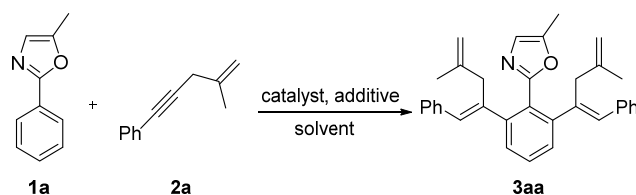

| Entry | Acid                            | Additive             | Temp. | Yield |
|-------|---------------------------------|----------------------|-------|-------|
| 1     | PhOCH <sub>2</sub> COOH         | -                    | 100   | 56%   |
| 2     | HOAc                            | -                    | 100   | 18%   |
| 3     | PhCOOH                          | -                    | 100   | 17%   |
| 4     | PhCH <sub>2</sub> COOH          | -                    | 100   | 45%   |
| 5     | ClCH <sub>2</sub> COOH          | -                    | 100   | 36%   |
| 6     | Na <sub>2</sub> CO <sub>3</sub> | -                    | 100   | ND    |
| 7     | PhOCH <sub>2</sub> COOH         | -                    | 80    | 61%   |
| 8     | PhOCH <sub>2</sub> COOH         | -                    | 120   | 29%   |
| 9     | PhOCH <sub>2</sub> COOH         | AgO                  | 80    | 65%   |
| 10    | PhOCH <sub>2</sub> COOH         | Ag <sub>2</sub> O    | 80    | 71%   |
| 11    | PhOCH <sub>2</sub> COOH         | AgOAc                | 80    | 66%   |
| 12    | PhOCH <sub>2</sub> COOH         | Cu(OAc) <sub>2</sub> | 80    | 39%   |
| 13    | PhOCH <sub>2</sub> COOH         | CuO                  | 80    | 65%   |
| 14    | PhOCH <sub>2</sub> COOH         | Cu <sub>2</sub> O    | 80    | 52%   |
| 15    | PhOCH <sub>2</sub> COOH         | MnO <sub>2</sub>     | 80    | 72%   |

<sup>a</sup>Reaction conditions: conditions:**1a** (0.05 mmol), **1a** (2.5 equiv), Cp\*Rh(CH<sub>3</sub>CN)<sub>3</sub>(SbF<sub>6</sub>)<sub>2</sub> (8 mol%), PhOCH<sub>2</sub>COOH (1.5 equiv), additive (0.3 equiv), toluene (0.5 mL), 100 °C, 24 h under Ar.

**Table S4. The effect of equivalent on the reaction<sup>a</sup>**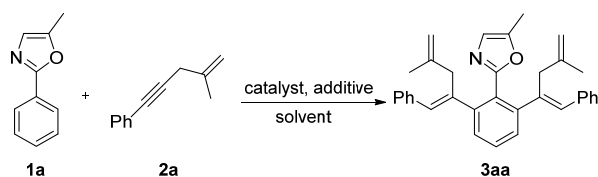

| Entry           | Catalyst                                                                   | Acid                        | Additive              | Yield |
|-----------------|----------------------------------------------------------------------------|-----------------------------|-----------------------|-------|
| 1               | Cp*Rh(CH <sub>3</sub> CN) <sub>3</sub> (SbF <sub>6</sub> ) <sub>2</sub> /8 | PhOCH <sub>2</sub> COOH/1   | MnO <sub>2</sub> /0.3 | 69%   |
| 2               | Cp*Rh(CH <sub>3</sub> CN) <sub>3</sub> (SbF <sub>6</sub> ) <sub>2</sub> /8 | PhOCH <sub>2</sub> COOH/1.5 | MnO <sub>2</sub> /0.3 | 77%   |
| 3               | Cp*Rh(CH <sub>3</sub> CN) <sub>3</sub> (SbF <sub>6</sub> ) <sub>2</sub> /8 | PhOCH <sub>2</sub> COOH/3   | MnO <sub>2</sub> /0.3 | 75%   |
| 4               | Cp*Rh(CH <sub>3</sub> CN) <sub>3</sub> (SbF <sub>6</sub> ) <sub>2</sub> /8 | PhOCH <sub>2</sub> COOH/1.5 | MnO <sub>2</sub> /0.5 | 71%   |
| 5               | Cp*Rh(CH <sub>3</sub> CN) <sub>3</sub> (SbF <sub>6</sub> ) <sub>2</sub> /8 | PhOCH <sub>2</sub> COOH/1.5 | MnO <sub>2</sub> /1   | 72%   |
| 6 <sup>b</sup>  | Cp*Rh(CH <sub>3</sub> CN) <sub>3</sub> (SbF <sub>6</sub> ) <sub>2</sub> /8 | PhOCH <sub>2</sub> COOH/1.5 | MnO <sub>2</sub> /0.3 | 75%   |
| 7 <sup>c</sup>  | Cp*Rh(CH <sub>3</sub> CN) <sub>3</sub> (SbF <sub>6</sub> ) <sub>2</sub> /8 | PhOCH <sub>2</sub> COOH/1.5 | MnO <sub>2</sub> /0.3 | 75%   |
| 8               | Cp*Rh(CH <sub>3</sub> CN) <sub>3</sub> (SbF <sub>6</sub> ) <sub>2</sub> /9 | PhOCH <sub>2</sub> COOH/1.5 | MnO <sub>2</sub> /0.3 | 76%   |
| 9               | Cp*Rh(CH <sub>3</sub> CN) <sub>3</sub> (SbF <sub>6</sub> ) <sub>2</sub> /7 | PhOCH <sub>2</sub> COOH/1.5 | MnO <sub>2</sub> /0.3 | 80%   |
| 10              | Cp*Rh(CH <sub>3</sub> CN) <sub>3</sub> (SbF <sub>6</sub> ) <sub>2</sub> /6 | PhOCH <sub>2</sub> COOH/1.5 | MnO <sub>2</sub> /0.3 | 75%   |
| 11 <sup>d</sup> | Cp*Rh(CH <sub>3</sub> CN) <sub>3</sub> (SbF <sub>6</sub> ) <sub>2</sub> /8 | PhOCH <sub>2</sub> COOH/1.5 | MnO <sub>2</sub> /0.3 | 72%   |
| 12 <sup>e</sup> | Cp*Rh(CH <sub>3</sub> CN) <sub>3</sub> (SbF <sub>6</sub> ) <sub>2</sub> /8 | PhOCH <sub>2</sub> COOH/1.5 | MnO <sub>2</sub> /0.3 | 51%   |
| 13              | Cp*Rh(CH <sub>3</sub> CN) <sub>3</sub> (SbF <sub>6</sub> ) <sub>2</sub> /8 | -                           | -                     | NR    |

<sup>a</sup>Reaction conditions: conditions: **1a** (0.05 mmol), **2a** (2.5 equiv), toluene (0.5 mL), 80 °C, 34 h under Ar. <sup>b</sup>**2a** (3 equiv). <sup>c</sup> under Air. <sup>d</sup> 60 °C, <sup>e</sup> 100 °C.

**Table S5. The scope of alkynes<sup>a</sup>**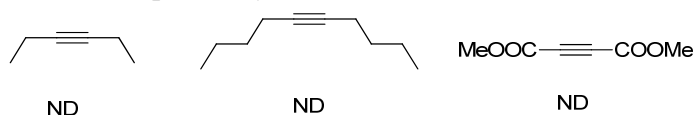

<sup>a</sup>Reaction conditions: **1a** (0.1 mmol), **2** (2.5 equiv), Cp\*Rh(CH<sub>3</sub>CN)<sub>3</sub>(SbF<sub>6</sub>)<sub>2</sub> (7 mol%), MnO<sub>2</sub> (0.3 equiv), PhOCH<sub>2</sub>COOH (1.5 equiv), toluene, 80 °C, under Ar, isolated yield.

## 5. Synthetic Applications

### Synthesis of **4**

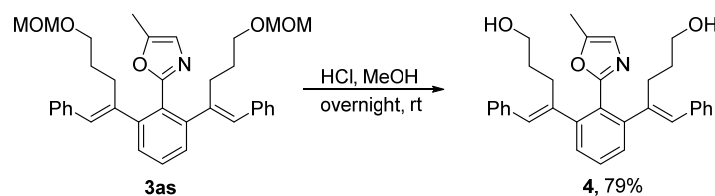

To a stirred solution of **3as** (0.026 mmol, 15.0 mg, 1.0 equiv) in MeOH (1.0 mL), con HCl (0.1 mL) was added, and the mixture was stirred at room temperature. After completion of the reaction (monitored by TLC), the mixture was quenched with water and extracted with ethyl acetate (3 × 20 mL), the combined organic layer was washed with brine and then the combined organic layers were dried (MgSO<sub>4</sub>), filtered, and concentrated in vacuo. Purification of the residue by column

chromatography (petroleum ether/ethyl acetate = 1/1, v/v) afforded the product **4** as a colorless oil (9.8 mg, 79% yield).

### Synthesis of 5

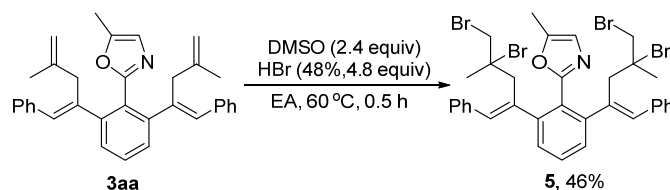

To a stirred solution of **3aa** (0.05 mmol, 23.6 mg, 1.0 equiv) in EA (1.0 mL), DMSO (8.6  $\mu\text{L}$ , 1.2 mmol) and aqueous hydrobromic acid (48%, 40.4 mg, 2.4 mmol) was added at 60  $^\circ\text{C}$  for 0.5 h, after completion of the reaction (monitored by TLC), the mixture was concentrated in vacuo. Purification of the residue by column chromatography (petroleum ether/ethyl acetate = 10/1, v/v) afforded the product **5** as a brownish red solid (18.1 mg, 46% yield)<sup>[5]</sup>.

### Synthesis of 6

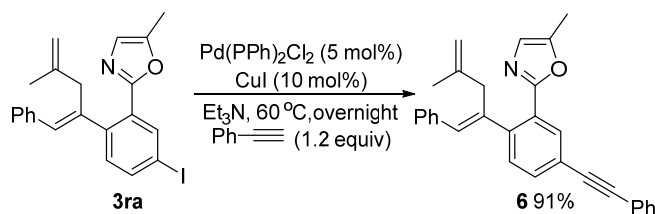

A mixture of **3ra** (0.057 mmol, 25.4 mg, 1.0 equiv), phenylacetylene (7.0 mg, 1.2 equiv), Pd(PPh<sub>3</sub>)<sub>2</sub>Cl<sub>2</sub> (2.0 mg, 5 mol%), CuI (1.1 mg, 10 mol%), and Et<sub>3</sub>N (0.5 mL) were added to an oven dried high pressure tube under Ar atmosphere. The reaction mixture was stirred at 60  $^\circ\text{C}$  until raw materials disappear (monitored by TLC). The mixture was quenched with saturated ammonium chloride and extracted with ethyl acetate (3  $\times$  20 mL), the combined organic layer was washed with brine and then the combined organic layers were dried (MgSO<sub>4</sub>), filtered, and concentrated in vacuo. Purification of the residue by column chromatography (petroleum ether/ethyl acetate = 10/1, v/v) afforded the product **6** as a colorless oil (21.5 mg, 91% yield)<sup>[3]</sup>.

### Synthesis of 7

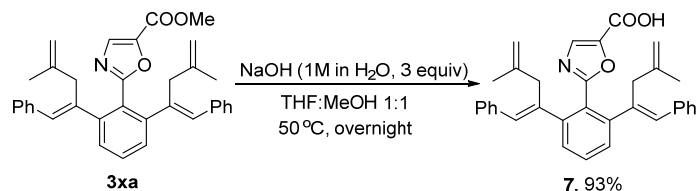

A mixture of **3xa** (0.056 mmol, 29.0 mg, 1.0 equiv), NaOH (1M in H<sub>2</sub>O, 0.17 mL, 3 equiv), THF (0.3 mL), MeOH (0.3 mL) were added to an oven dried high-pressure tube under Ar atmosphere. The reaction mixture was stirred at 50  $^\circ\text{C}$  overnight. The mixture was cooled to room temperature, and con HCl (12 M, 14  $\mu\text{L}$ , 3 equiv) was added and the mixture was concentrated in

vacuo. The mixture was quenched with water and extracted with ethyl acetate ( $3 \times 20$  mL), the combined organic layer was washed with brine and then the combined organic layers were dried ( $\text{MgSO}_4$ ), filtered, and concentrated in vacuo to give the product **7** as a white solid (26.1 mg, 93% yield).

## Synthesis of **8**

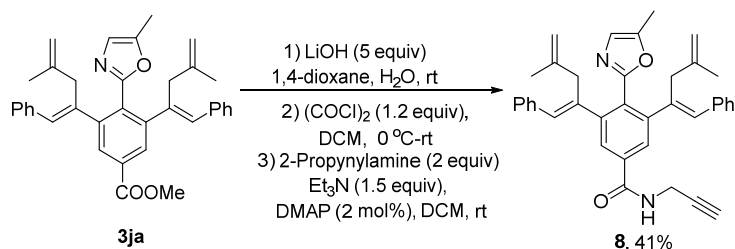

A mixture of **3ja** (0.15 mmol, 79.0 mg, 1.0 equiv), LiOH (18.0 mg, 5 equiv), 1,4-dioxane (0.5 mL),  $\text{H}_2\text{O}$  (0.5 mL) were added to an oven dried high pressure tube under Ar atmosphere. The reaction mixture was stirred at room temperature overnight. The mixture was cooled to  $0^\circ\text{C}$ , and con HCl (12 M, 63  $\mu\text{L}$ , 5 equiv) was added. The mixture was quenched with water and extracted with ethyl acetate ( $3 \times 20$  mL), the combined organic layer was washed with brine and then the combined organic layers were dried ( $\text{MgSO}_4$ ), filtered, and concentrated in vacuo to give the crude product acid as a white solid (67.2 mg, 87% yield).

A 25 mL oven-dried tube flask with a stir bar was purged with argon and charged with the crude product acid (0.13 mmol, 67.2 mg) in anhydrous  $\text{CH}_2\text{Cl}_2$  (1.0 mL), which was added DMF (1 drop) at  $0^\circ\text{C}$  and  $(\text{COCl})_2$  (13.2  $\mu\text{L}$ , 1.2 equiv) was subsequently added dropwise by syringe. After 15 min, the reaction mixture was allowed to warm to room temperature overnight. After removal of the volatiles under vacuum, the crude product acid chloride was used directly without any further purification. To a solution of the propargylic amine (16.7  $\mu\text{L}$ , 2 equiv) in anhydrous  $\text{CH}_2\text{Cl}_2$  (2.0 mL) at  $0^\circ\text{C}$ ,  $\text{Et}_3\text{N}$  (27.1  $\mu\text{L}$ , 1.5 equiv) and DMAP (0.3 mg, 2 mol%) were added, and the acid chloride (1.0 equiv) was added dropwise at  $0^\circ\text{C}$ . After 15 min, the mixture was stirred at room temperature overnight. After the reaction was completed, the mixture was quenched with water and extracted with  $\text{CH}_2\text{Cl}_2$  ( $3 \times 20$  mL), the combined organic layer was washed with brine and then the combined organic layers were dried ( $\text{MgSO}_4$ ), filtered, and concentrated in vacuo. Purification of the residue by column chromatography (petroleum ether/ethyl acetate = 3/1, v/v) afforded the product **8** as a colorless oil (35.0 mg, 41% yield).

## 6. Mechanism Study

### (1) Intermolecular competition experiments

The intermolecular competition reaction between Me- and Cl- substituent on the para-position of aryl ring with **2a** under standard conditions revealed that the electron-poor substituent exhibited a little bit better reaction activity in this competition reaction (eq 1). Furthermore, **3ab** and **3ae** showed no obvious reactivity difference in this reaction system, and the little mixed product with alkenes that would come from the two alkynes has been obtained, which was determined by LC-MS, exact mass: 520.2407, found: 520.2. (eq 2).

(a) Intermolecular competition experiments

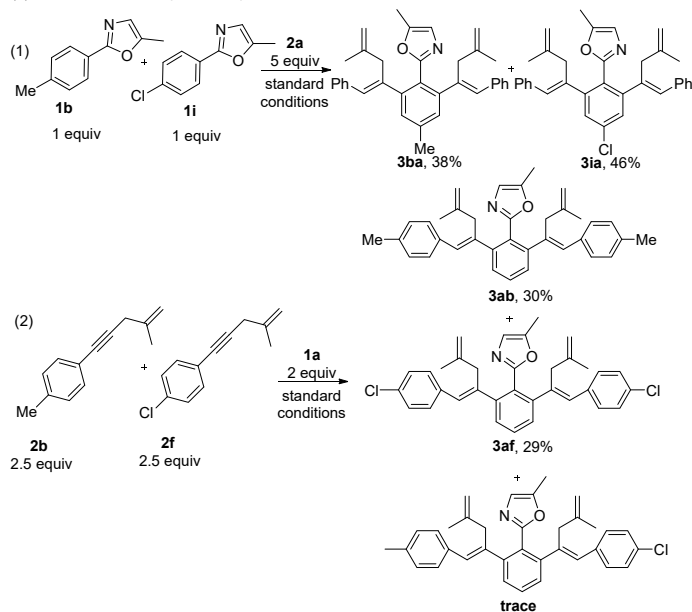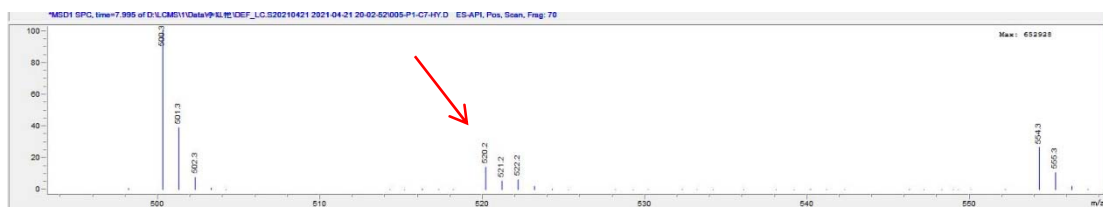

the little mixed product was determined by LC-MS

(1) H/D exchange experiments

Deuterium-labeling experiments were performed to study the mechanism of this reaction. **1a** (15.9 mg, 0.1 mmol), Cp\*Rh(CH<sub>3</sub>CN)<sub>3</sub>(SbF<sub>6</sub>)<sub>2</sub> (5.9 mg, 7 mol%), PhOCH<sub>2</sub>COOH (22.8 mg, 1.5 equiv), MnO<sub>2</sub> (2.6 mg, 0.3 equiv) were stirred in toluene (1.0 mL) and D<sub>2</sub>O (0.1 mL) under Ar atmosphere at 80 °C for 12 h. After completion, the reaction mixture was purified by column chromatography (petroleum ether/ethyl acetate =10/1, v/v) to afford the product **1a**+**[D<sub>2</sub>]-1a**. The deuterium rate (78%) was obtained from <sup>1</sup>H NMR. Deuterium was observed at both *ortho*-positions of phenyl ring, which indicated the possibility of the reaction pathway via *ortho* C–H activation.

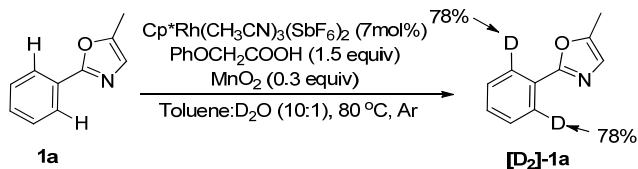



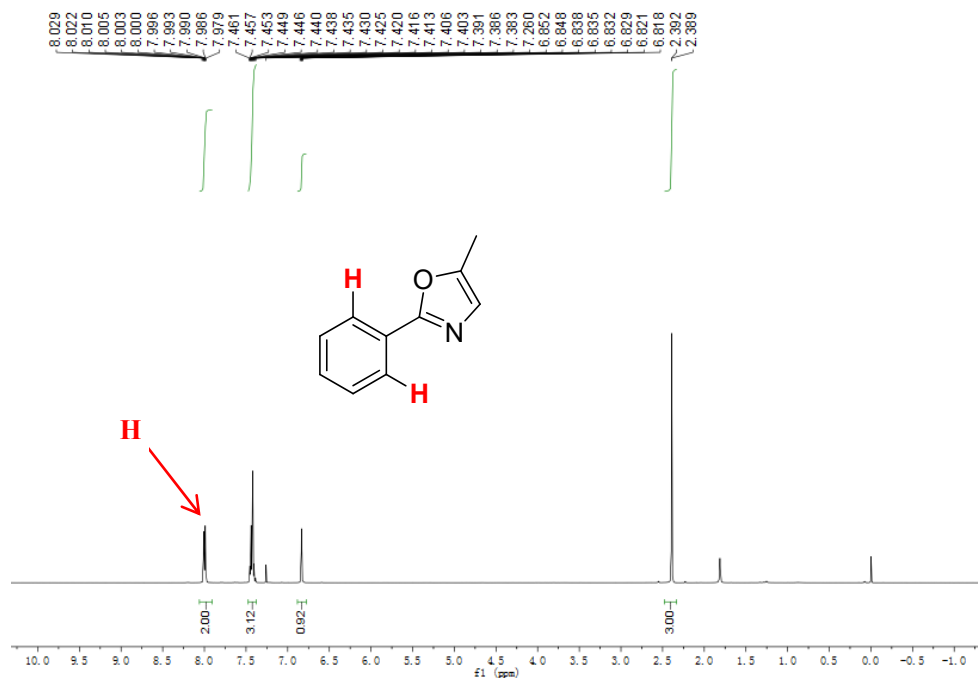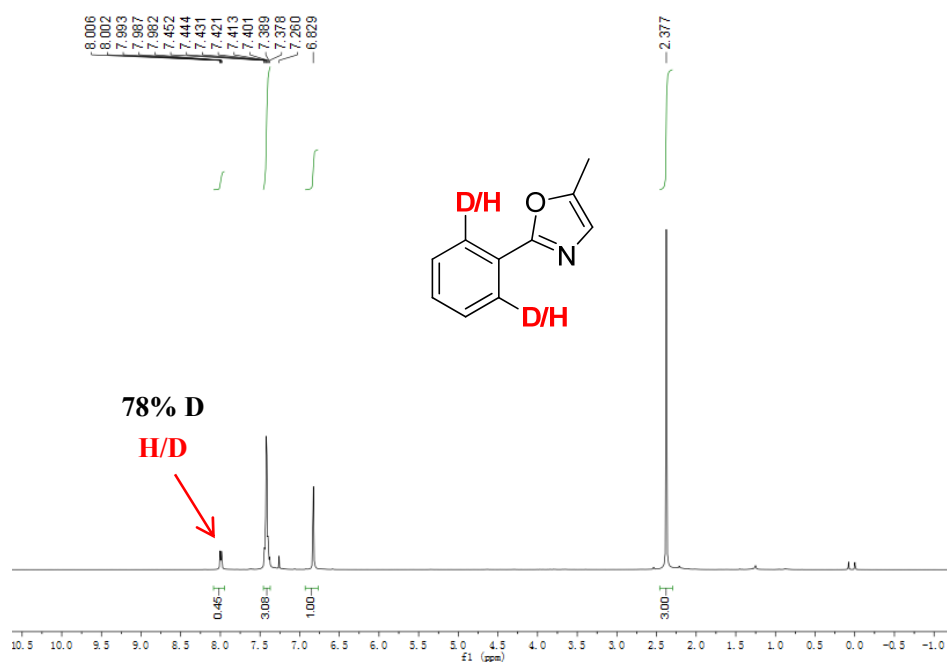

## (2) Kinetic isotope experiments

### Intermolecular kinetic isotope effect:

The kinetic isotope effect (KIE) study was conducted. Two oven-dried 25 mL tube were separately charged with **1a** (8.0 mg, 0.05 mmol), or [**D5**]-**1a** (8.2 mg, 0.05 mmol), and (4-methylpent-4-en-1-yn-1-yl)benzene **2a** (19.5 mg, 2.5 equiv) were stirred at 80 °C for 2 h under standard conditions. After completion, the reaction mixture was purified by flash chromatography eluting with ethyl acetate and petroleum ether (1:15) to give **3aa** and [**D**]-**3aa** in 21% and 10% respectively. The KIE value was determined using isolated yields to give kinetic isotopic effect (KIE)  $k_H/k_D = 2.1$ , thus indicating that the first C-H bond cleavage might be involved in the

product determining step.

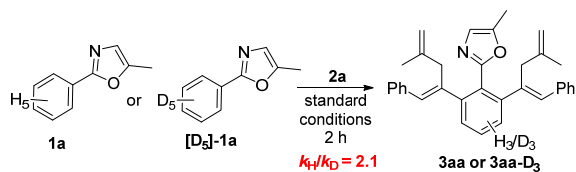

### Intramolecular kinetic isotope effect:

In addition, the kinetic isotope effect (KIE) study was conducted. An oven-dried 25 ml tube **1a** (8.0 mg, 0.05 mmol), **[D<sub>5</sub>]-1a** (8.2 mg, 0.05 mmol), and (4-methylpent-4-en-1-yn-1-yl)benzene **2a** (39.0 mg, 2.5 equiv) were stirred at 80 °C for 5 h under standard conditions. After completion, the reaction mixture was purified by flash chromatography eluting with ethyl acetate and petroleum ether (1:15) to give **3aa** + **[D]-3aa**. The ratio of two products was determined by <sup>1</sup>H NMR integration method to give kinetic isotopic effect (KIE)  $k_H/k_D = 2.0$ , thus indicating that the first C-H bond cleavage might be involved in the product determining step.

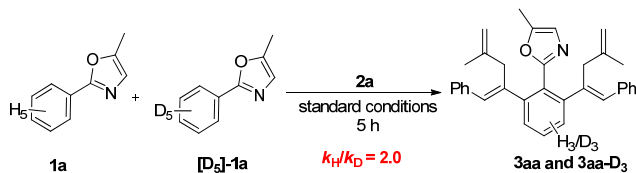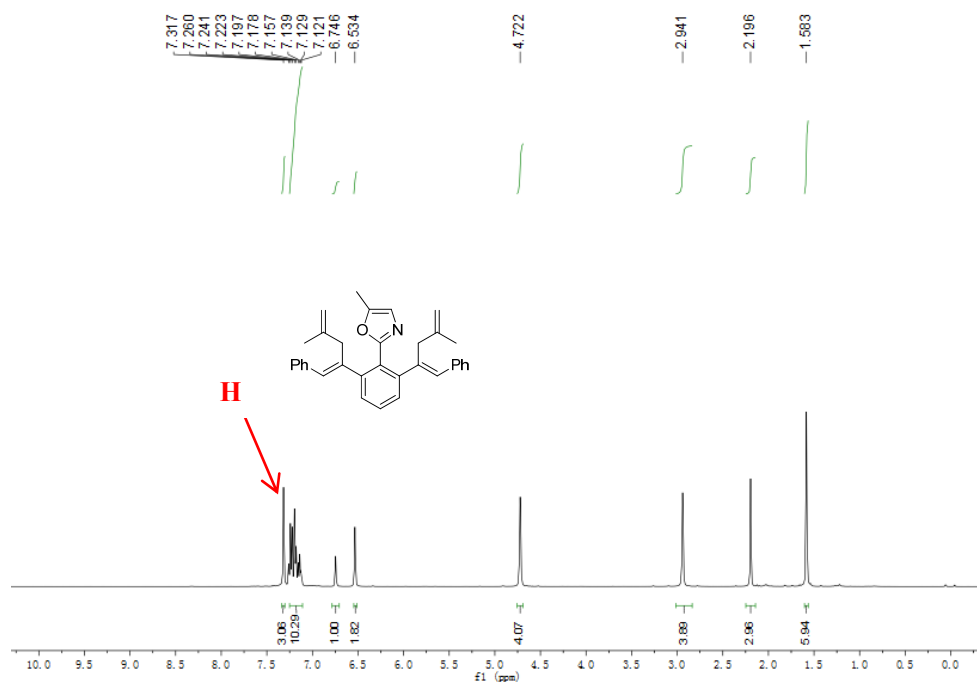

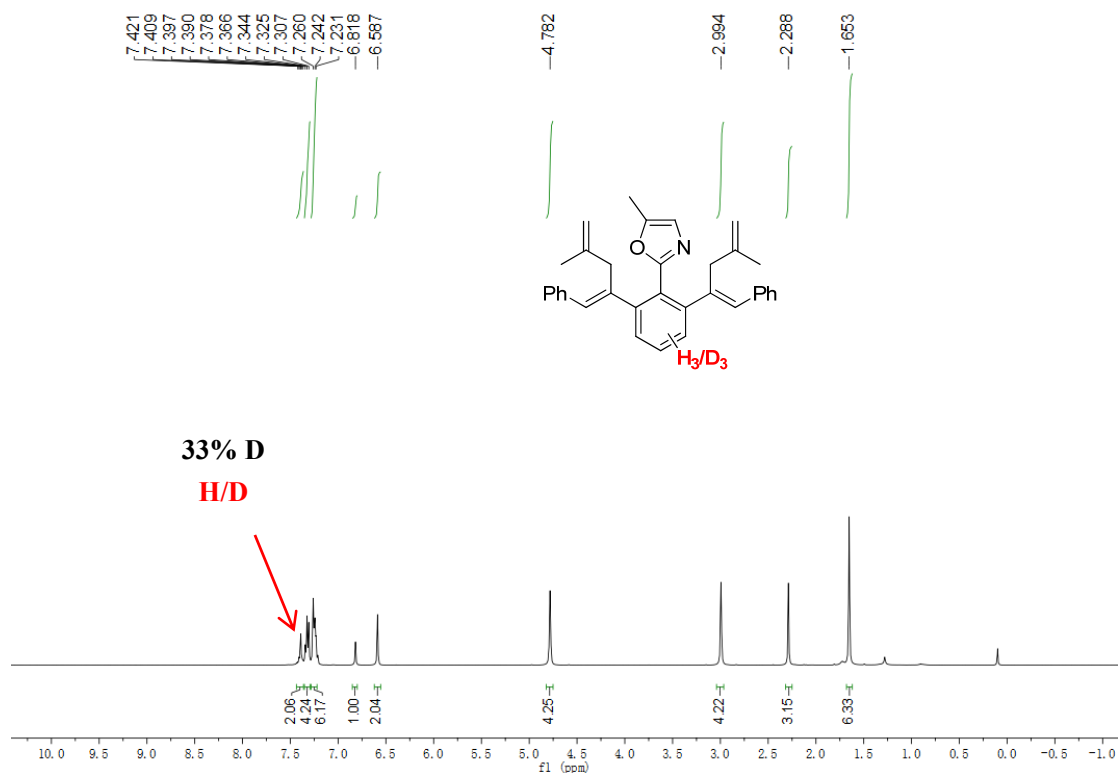

## 7. References

- (1) He, Y.; Liao, X. Z.; Dong, L.; Chen, F. E. *Org. Biomol. Chem.* **2021**, *19*, 561–567.
- (2) Lin, H.; Dong, L. *Org. Lett.* **2016**, *18*, 5524–5527.
- (3) Huang, L., Rudolph, M., Rominger, F., Hashmi, A. S. K. *Angew. Chem. Int. Ed.* **2016**, *55*, 4808–4813.
- (4) Xu, J.; Wang, Y. L.; Gong, T. J., Xiao, B., Fu, Y. *Chem. Commun.*, **2014**, *50*, 12915–12918.
- (5) Song, S.; Li, X. W.; Sun, X., Yuan, Y., Jiao, N. *Green Chem.*, **2015**, *17*, 3285–3289.

## 8. X-ray Data of Compound **3ya** and Sample Preparation

### 8.1 Sample preparation and crystal measurement

Single crystals suitable for X-ray diffraction experiment were obtained by slow evaporation of EA/petroleum ether (1:20, V/V) solution containing the corresponding compound **3ya**. The crystal was kept at 298.0 K during data collection. Using Olex2 [1], the structure was solved with the SHELXT [2] structure solution program using Intrinsic Phasing and refined with the SHELXL [3] refinement package using Least Squares minimisation.

### 8.2 X-ray data of compound **3ya**

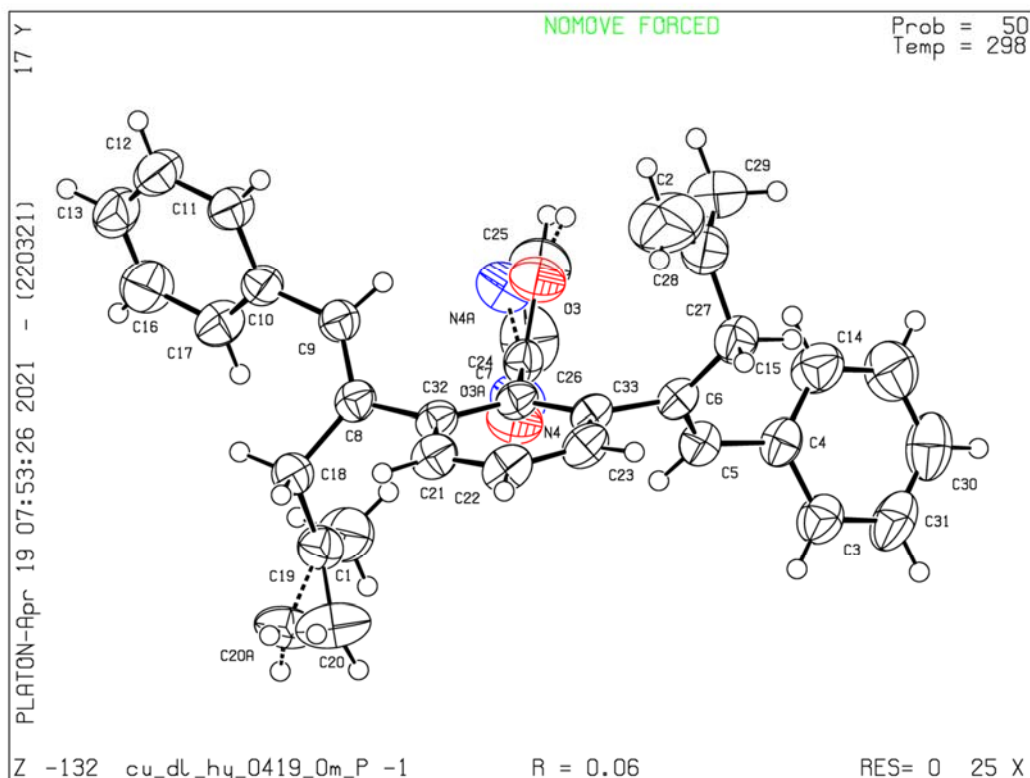

**Figure S1: X-ray structure of 3ya.**

**Table 1 Crystal data and structure refinement for 3ya.**

|                                  |                                     |
|----------------------------------|-------------------------------------|
| Identification code              | <b>3ya</b>                          |
| Empirical formula                | C <sub>33</sub> H <sub>31</sub> NO  |
| Formula weight                   | 457.59                              |
| Temperature/K                    | 298.0                               |
| Crystal system                   | triclinic                           |
| Space group                      | P-1                                 |
| a/Å                              | 9.8028(4)                           |
| b/Å                              | 11.5069(5)                          |
| c/Å                              | 12.8022(6)                          |
| $\alpha$ /°                      | 65.998(3)                           |
| $\beta$ /°                       | 84.345(3)                           |
| $\gamma$ /°                      | 84.332(3)                           |
| Volume/Å <sup>3</sup>            | 1310.06(10)                         |
| Z                                | 2                                   |
| $\rho_{\text{calc}}/\text{cm}^3$ | 1.160                               |
| $\mu/\text{mm}^{-1}$             | 0.529                               |
| F(000)                           | 488.0                               |
| Crystal size/mm <sup>3</sup>     | 0.53 × 0.44 × 0.24                  |
| Radiation                        | CuK $\alpha$ ( $\lambda$ = 1.54178) |

2 $\theta$  range for data collection/ $^{\circ}$  7.574 to 134.106  
 Index ranges  $-10 \leq h \leq 11, -13 \leq k \leq 13, -15 \leq l \leq 15$   
 Reflections collected 33779  
 Independent reflections 4597 [ $R_{\text{int}} = 0.0718, R_{\text{sigma}} = 0.0415$ ]  
 Data/restraints/parameters 4597/0/337  
 Goodness-of-fit on  $F^2$  1.112  
 Final R indexes [ $I \geq 2\sigma(I)$ ]  $R_1 = 0.0556, wR_2 = 0.1616$   
 Final R indexes [all data]  $R_1 = 0.0659, wR_2 = 0.1707$   
 Largest diff. peak/hole /  $e \text{ \AA}^{-3}$  0.25/-0.21

**Table 2 Fractional Atomic Coordinates ( $\times 10^4$ ) and Equivalent Isotropic Displacement Parameters ( $\text{\AA}^2 \times 10^3$ ) for 3ya. Ueq is defined as 1/3 of the trace of the orthogonalised UIJ tensor.**

| Atom | x           | y          | z          | U(eq)     |
|------|-------------|------------|------------|-----------|
| C1   | 6496(2)     | 6880(3)    | 2929(2)    | 82.8(7)   |
| C2   | 8926(3)     | -609(3)    | 3692(3)    | 123.5(11) |
| C33  | 6759.9(14)  | 1843.4(14) | 4041.8(12) | 41.3(4)   |
| C32  | 7991.4(14)  | 3482.8(14) | 4237.2(12) | 41.5(4)   |
| O3   | 8330.8(18)  | 3319(5)    | 1640.8(17) | 64.3(9)   |
| N4   | 6675(5)     | 4693(4)    | 1716(4)    | 62.1(8)   |
| C30  | 2237(2)     | 1473(2)    | 663(2)     | 80.2(7)   |
| C31  | 1733(2)     | 1795(2)    | 1557(2)    | 75.3(6)   |
| C3   | 2620.6(18)  | 1966.7(17) | 2250.5(17) | 60.2(5)   |
| C4   | 4035.8(16)  | 1812.1(15) | 2060.9(14) | 49.4(4)   |
| C5   | 4952.7(15)  | 2072.5(15) | 2786.9(13) | 47.4(4)   |
| C6   | 6019.4(15)  | 1363.3(14) | 3340.9(12) | 43.6(4)   |
| C7   | 7386.9(14)  | 3003.9(14) | 3550.9(12) | 40.3(4)   |
| C8   | 8756.3(15)  | 4667.7(14) | 3741.4(12) | 42.2(4)   |
| C9   | 9813.6(15)  | 4751.7(15) | 2974.6(13) | 46.1(4)   |
| C10  | 10771.9(16) | 5775.6(16) | 2421.2(12) | 46.5(4)   |
| C11  | 12168.6(17) | 5443.0(19) | 2316.3(15) | 56.2(4)   |
| C12  | 13120(2)    | 6351(2)    | 1833.2(17) | 68.3(5)   |
| C13  | 12698(2)    | 7613(2)    | 1418.8(17) | 69.7(6)   |
| C14  | 3613(3)     | 1324(2)    | 467(2)     | 83.6(7)   |
| C15  | 4517(2)     | 1496(2)    | 1152.9(17) | 69.9(5)   |
| C16  | 11335(2)    | 7964(2)    | 1479.5(18) | 73.6(6)   |
| C17  | 10364.8(19) | 7061.3(17) | 1968.4(16) | 58.8(5)   |
| C18  | 8356.0(16)  | 5637.4(16) | 4253.5(13) | 47.9(4)   |
| C19  | 6926.2(18)  | 6263.1(16) | 4042.0(15) | 55.4(4)   |
| C21  | 7912.6(16)  | 2781.1(16) | 5419.7(13) | 50.1(4)   |

| Atom | x          | y          | z          | U(eq)   |
|------|------------|------------|------------|---------|
| C22  | 7325.5(17) | 1626.8(17) | 5899.7(13) | 52.6(4) |
| C23  | 6772.6(16) | 1146.0(16) | 5219.0(13) | 49.9(4) |
| C24  | 7437.5(16) | 3709.8(15) | 2294.2(12) | 45.0(4) |
| C25  | 8092(3)    | 4173(3)    | 545.9(16)  | 84.2(7) |
| C26  | 7089(3)    | 4980(2)    | 593.9(17)  | 84.6(7) |
| C27  | 6467.3(17) | 36.1(16)   | 3418.9(16) | 54.7(4) |
| C28  | 7935(2)    | -109.2(19) | 2975(2)    | 71.2(6) |
| C29  | 8210(2)    | 331(3)     | 1738(2)    | 93.8(8) |
| O3A  | 6470(50)   | 4760(50)   | 1900(30)   | 64.3(9) |
| N4A  | 8450(60)   | 3870(80)   | 1540(40)   | 62.1(8) |
| C20  | 5981(8)    | 6043(17)   | 4981(6)    | 97(3)   |
| C20A | 6323(17)   | 6638(16)   | 4933(8)    | 73(3)   |

**Table 3 Anisotropic Displacement Parameters ( $\text{\AA}^2 \times 10^3$ ) for 3ya. The Anisotropic displacement factor exponent takes the form:  $-2\pi^2[h^2a^{*2}U_{11}+2hka^*b^*U_{12}+\dots]$ .**

| Atom | U <sub>11</sub> | U <sub>22</sub> | U <sub>33</sub> | U <sub>23</sub> | U <sub>13</sub> | U <sub>12</sub> |
|------|-----------------|-----------------|-----------------|-----------------|-----------------|-----------------|
| C1   | 65.2(13)        | 109.2(17)       | 83.8(14)        | -47.6(13)       | -21.9(11)       | 6.3(12)         |
| C2   | 70.4(16)        | 149(3)          | 152(3)          | -65(2)          | -31.6(17)       | 33.9(18)        |
| C33  | 32.6(7)         | 44.0(8)         | 42.1(8)         | -12.3(6)        | -2.8(6)         | -1.4(6)         |
| C32  | 34.0(7)         | 48.8(8)         | 40.1(8)         | -16.1(6)        | -5.0(6)         | -0.5(6)         |
| O3   | 73.7(10)        | 75(2)           | 43.0(8)         | -24.9(10)       | 5.0(7)          | -1.7(10)        |
| N4   | 79(2)           | 56.5(11)        | 42.6(18)        | -12.3(11)       | -10.6(13)       | 6.2(12)         |
| C30  | 81.2(15)        | 79.2(14)        | 82.6(15)        | -26.0(12)       | -35.4(12)       | -14.3(11)       |
| C31  | 48.1(11)        | 72.2(13)        | 99.0(16)        | -22.3(12)       | -22.6(10)       | -9.1(9)         |
| C3   | 49.5(10)        | 57.2(10)        | 70.4(11)        | -20.9(9)        | -10.4(8)        | -2.3(8)         |
| C4   | 46.5(9)         | 45.7(8)         | 50.0(9)         | -10.8(7)        | -10.0(7)        | -6.5(7)         |
| C5   | 44.7(9)         | 46.1(8)         | 49.0(9)         | -15.7(7)        | -5.3(7)         | -4.7(7)         |
| C6   | 36.9(8)         | 45.7(8)         | 44.0(8)         | -13.3(6)        | 0.7(6)          | -7.2(6)         |
| C7   | 34.5(7)         | 46.2(8)         | 37.2(7)         | -13.9(6)        | -2.9(6)         | -1.0(6)         |
| C8   | 38.0(8)         | 50.5(9)         | 38.1(7)         | -17.0(6)        | -7.1(6)         | -2.5(6)         |
| C9   | 44.2(8)         | 54.2(9)         | 44.1(8)         | -23.2(7)        | -3.7(6)         | -5.4(7)         |
| C10  | 45.0(8)         | 60.1(10)        | 38.4(8)         | -23.3(7)        | 0.6(6)          | -8.9(7)         |
| C11  | 47.3(9)         | 67.4(11)        | 57.9(10)        | -29.7(8)        | 2.3(7)          | -6.9(8)         |
| C12  | 48.9(10)        | 94.6(15)        | 68.2(12)        | -39.3(11)       | 7.3(8)          | -17.6(10)       |
| C13  | 66.4(12)        | 83.8(15)        | 62.9(11)        | -31.9(10)       | 17.0(9)         | -32.5(10)       |
| C14  | 87.5(16)        | 105.9(18)       | 69.6(13)        | -43.9(13)       | -17.9(11)       | -10.2(13)       |
| C15  | 56.0(11)        | 96.3(15)        | 60.9(11)        | -33.9(11)       | -6.1(8)         | -7.8(10)        |
| C16  | 81.9(15)        | 60.1(11)        | 69.9(12)        | -18.1(10)       | 11.4(10)        | -15.2(10)       |
| C17  | 51.5(10)        | 60.2(11)        | 58.2(10)        | -17.5(8)        | 1.7(8)          | -6.2(8)         |

**Table 3 Anisotropic Displacement Parameters ( $\text{\AA}^2 \times 10^3$ ) for 3ya. The Anisotropic displacement factor exponent takes the form:  $-2\pi^2[h^2a^{*2}U_{11}+2hka^*b^*U_{12}+\dots]$ .**

| Atom | $U_{11}$  | $U_{22}$  | $U_{33}$  | $U_{23}$  | $U_{13}$  | $U_{12}$  |
|------|-----------|-----------|-----------|-----------|-----------|-----------|
| C18  | 46.1(9)   | 59.1(9)   | 44.2(8)   | -26.0(7)  | -3.3(6)   | -5.6(7)   |
| C19  | 52.8(10)  | 55.6(10)  | 61.3(10)  | -27.6(8)  | -5.2(8)   | 0.3(8)    |
| C21  | 46.2(9)   | 63.4(10)  | 38.3(8)   | -16.6(7)  | -8.4(6)   | -3.2(7)   |
| C22  | 48.4(9)   | 61.3(10)  | 36.5(8)   | -6.8(7)   | -6.2(6)   | -3.5(7)   |
| C23  | 42.8(9)   | 52.5(9)   | 43.9(8)   | -7.9(7)   | -2.3(6)   | -6.4(7)   |
| C24  | 48.9(9)   | 47.4(9)   | 38.4(8)   | -15.0(7)  | -2.1(6)   | -12.0(7)  |
| C25  | 107.7(19) | 103.2(18) | 36.8(10)  | -23.2(10) | 6.7(10)   | -18.0(15) |
| C26  | 124(2)    | 75.1(14)  | 39.7(10)  | -1.6(9)   | -21.1(11) | -16.6(14) |
| C27  | 49.1(9)   | 47.6(9)   | 64.4(10)  | -18.4(8)  | -6.6(8)   | -4.7(7)   |
| C28  | 52.2(11)  | 59.8(11)  | 109.6(17) | -42.6(11) | -10.3(11) | 3.5(8)    |
| C29  | 71.8(15)  | 108.6(19) | 116(2)    | -64.9(16) | 20.7(13)  | -9.5(13)  |
| O3A  | 73.7(10)  | 75(2)     | 43.0(8)   | -24.9(10) | 5.0(7)    | -1.7(10)  |
| N4A  | 79(2)     | 56.5(11)  | 42.6(18)  | -12.3(11) | -10.6(13) | 6.2(12)   |
| C20  | 69(3)     | 117(8)    | 90(3)     | -34(4)    | 13(2)     | 19(4)     |
| C20A | 77(6)     | 61(6)     | 71(4)     | -25(4)    | 9(4)      | 18(5)     |

**Table 4 Bond Lengths for 3ya.**

| Atom | Atom | Length/ $\text{\AA}$ | Atom | Atom | Length/ $\text{\AA}$ |
|------|------|----------------------|------|------|----------------------|
| C1   | C19  | 1.397(3)             | C8   | C18  | 1.512(2)             |
| C2   | C28  | 1.324(3)             | C9   | C10  | 1.477(2)             |
| C33  | C6   | 1.499(2)             | C10  | C11  | 1.393(2)             |
| C33  | C7   | 1.400(2)             | C10  | C17  | 1.384(2)             |
| C33  | C23  | 1.390(2)             | C11  | C12  | 1.377(3)             |
| C32  | C7   | 1.410(2)             | C12  | C13  | 1.364(3)             |
| C32  | C8   | 1.493(2)             | C13  | C16  | 1.362(3)             |
| C32  | C21  | 1.394(2)             | C14  | C15  | 1.387(3)             |
| O3   | C24  | 1.324(3)             | C16  | C17  | 1.388(3)             |
| O3   | C25  | 1.373(4)             | C18  | C19  | 1.508(2)             |
| N4   | C24  | 1.283(5)             | C19  | C20  | 1.395(7)             |
| N4   | C26  | 1.365(5)             | C19  | C20A | 1.433(10)            |
| C30  | C31  | 1.375(4)             | C21  | C22  | 1.375(2)             |
| C30  | C14  | 1.355(3)             | C22  | C23  | 1.380(2)             |
| C31  | C3   | 1.383(3)             | C24  | O3A  | 1.41(5)              |
| C3   | C4   | 1.391(2)             | C24  | N4A  | 1.28(5)              |
| C4   | C5   | 1.485(2)             | C25  | C26  | 1.299(3)             |
| C4   | C15  | 1.381(3)             | C25  | N4A  | 1.25(5)              |
| C5   | C6   | 1.330(2)             | C26  | O3A  | 1.65(3)              |

**Table 4 Bond Lengths for 3ya.**

| Atom | Atom | Length/Å | Atom | Atom | Length/Å |
|------|------|----------|------|------|----------|
| C6   | C27  | 1.512(2) | C26  | N4A  | 1.89(5)  |
| C7   | C24  | 1.476(2) | C27  | C28  | 1.513(3) |
| C8   | C9   | 1.338(2) | C28  | C29  | 1.459(3) |

**Table 5 Bond Angles for 3ya.**

| Atom | Atom | Atom | Angle/°    | Atom | Atom | Atom | Angle/°    |
|------|------|------|------------|------|------|------|------------|
| C7   | C33  | C6   | 121.76(12) | C4   | C15  | C14  | 120.9(2)   |
| C23  | C33  | C6   | 119.16(14) | C13  | C16  | C17  | 121.2(2)   |
| C23  | C33  | C7   | 119.01(14) | C10  | C17  | C16  | 120.25(17) |
| C7   | C32  | C8   | 122.52(13) | C19  | C18  | C8   | 115.53(12) |
| C21  | C32  | C7   | 117.91(14) | C1   | C19  | C18  | 120.64(17) |
| C21  | C32  | C8   | 119.51(13) | C1   | C19  | C20A | 120.4(4)   |
| C24  | O3   | C25  | 104.0(3)   | C20  | C19  | C1   | 120.3(3)   |
| C24  | N4   | C26  | 105.6(4)   | C20  | C19  | C18  | 118.4(3)   |
| C14  | C30  | C31  | 119.37(18) | C20A | C19  | C18  | 113.9(6)   |
| C30  | C31  | C3   | 120.4(2)   | C22  | C21  | C32  | 121.19(14) |
| C31  | C3   | C4   | 120.8(2)   | C21  | C22  | C23  | 120.51(14) |
| C3   | C4   | C5   | 119.01(16) | C22  | C23  | C33  | 120.37(15) |
| C15  | C4   | C3   | 117.68(15) | O3   | C24  | C7   | 119.6(2)   |
| C15  | C4   | C5   | 123.19(15) | N4   | C24  | O3   | 113.05(18) |
| C6   | C5   | C4   | 129.24(15) | N4   | C24  | C7   | 127.3(3)   |
| C33  | C6   | C27  | 116.44(13) | O3A  | C24  | C7   | 114.5(14)  |
| C5   | C6   | C33  | 118.38(14) | N4A  | C24  | C7   | 130.5(19)  |
| C5   | C6   | C27  | 124.88(14) | N4A  | C24  | O3A  | 109(3)     |
| C33  | C7   | C32  | 120.87(13) | C26  | C25  | O3   | 108.6(2)   |
| C33  | C7   | C24  | 118.94(13) | N4A  | C25  | C26  | 96(3)      |
| C32  | C7   | C24  | 120.18(13) | C25  | C26  | N4   | 108.7(3)   |
| C32  | C8   | C18  | 115.99(13) | C25  | C26  | O3A  | 114.7(16)  |
| C9   | C8   | C32  | 119.13(14) | C25  | C26  | N4A  | 41.1(18)   |
| C9   | C8   | C18  | 124.54(14) | O3A  | C26  | N4A  | 76(2)      |
| C8   | C9   | C10  | 129.29(14) | C6   | C27  | C28  | 114.31(14) |
| C11  | C10  | C9   | 118.82(15) | C2   | C28  | C27  | 120.6(3)   |
| C17  | C10  | C9   | 123.89(15) | C2   | C28  | C29  | 121.8(2)   |
| C17  | C10  | C11  | 117.26(16) | C29  | C28  | C27  | 117.61(18) |
| C12  | C11  | C10  | 121.74(18) | C24  | O3A  | C26  | 86.8(17)   |
| C13  | C12  | C11  | 119.92(19) | C24  | N4A  | C26  | 81(2)      |
| C16  | C13  | C12  | 119.53(19) | C25  | N4A  | C24  | 114(4)     |
| C30  | C14  | C15  | 120.9(2)   | C25  | N4A  | C26  | 43.0(15)   |



**Table 6 Torsion Angles for 3ya.**

| A   | B   | C   | D   | Angle/°     | A   | B   | C   | D    | Angle/°     |
|-----|-----|-----|-----|-------------|-----|-----|-----|------|-------------|
| C33 | C6  | C27 | C28 | -63.7(2)    | C8  | C9  | C10 | C17  | -44.9(2)    |
| C33 | C7  | C24 | O3  | -76.2(3)    | C8  | C18 | C19 | C1   | -54.8(2)    |
| C33 | C7  | C24 | N4  | 102.5(3)    | C8  | C18 | C19 | C20  | 115.3(9)    |
| C33 | C7  | C24 | O3A | 102(2)      | C8  | C18 | C19 | C20A | 150.2(9)    |
| C33 | C7  | C24 | N4A | -107(6)     | C9  | C8  | C18 | C19  | 120.22(17)  |
| C32 | C7  | C24 | O3  | 102.4(3)    | C9  | C10 | C11 | C12  | -178.48(15) |
| C32 | C7  | C24 | N4  | -79.0(3)    | C9  | C10 | C17 | C16  | 178.90(16)  |
| C32 | C7  | C24 | O3A | -79(2)      | C10 | C11 | C12 | C13  | -1.5(3)     |
| C32 | C7  | C24 | N4A | 72(6)       | C11 | C10 | C17 | C16  | -2.8(3)     |
| C32 | C8  | C9  | C10 | -175.88(13) | C11 | C12 | C13 | C16  | -0.5(3)     |
| C32 | C8  | C18 | C19 | -66.55(18)  | C12 | C13 | C16 | C17  | 0.8(3)      |
| C32 | C21 | C22 | C23 | -1.3(2)     | C13 | C16 | C17 | C10  | 0.9(3)      |
| O3  | C25 | C26 | N4  | 1.5(4)      | C14 | C30 | C31 | C3   | 0.0(3)      |
| C30 | C31 | C3  | C4  | -0.3(3)     | C15 | C4  | C5  | C6   | -52.8(3)    |
| C30 | C14 | C15 | C4  | 0.7(4)      | C17 | C10 | C11 | C12  | 3.1(2)      |
| C31 | C30 | C14 | C15 | -0.2(4)     | C18 | C8  | C9  | C10  | -2.9(2)     |
| C31 | C3  | C4  | C5  | 176.79(17)  | C21 | C32 | C7  | C33  | -1.6(2)     |
| C31 | C3  | C4  | C15 | 0.7(3)      | C21 | C32 | C7  | C24  | 179.86(13)  |
| C3  | C4  | C5  | C6  | 131.29(19)  | C21 | C32 | C8  | C9   | 121.28(16)  |
| C3  | C4  | C15 | C14 | -0.9(3)     | C21 | C32 | C8  | C18  | -52.33(18)  |
| C4  | C5  | C6  | C33 | -178.72(15) | C21 | C22 | C23 | C33  | -2.2(2)     |
| C4  | C5  | C6  | C27 | -5.2(3)     | C23 | C33 | C6  | C5   | 117.18(17)  |
| C5  | C4  | C15 | C14 | -176.82(19) | C23 | C33 | C6  | C27  | -56.90(19)  |
| C5  | C6  | C27 | C28 | 122.70(19)  | C23 | C33 | C7  | C32  | -1.7(2)     |
| C6  | C33 | C7  | C32 | 175.35(13)  | C23 | C33 | C7  | C24  | 176.78(14)  |
| C6  | C33 | C7  | C24 | -6.1(2)     | C24 | O3  | C25 | C26  | -1.4(4)     |
| C6  | C33 | C23 | C22 | -173.48(14) | C24 | N4  | C26 | C25  | -0.9(4)     |
| C6  | C27 | C28 | C2  | 99.6(3)     | C25 | O3  | C24 | N4   | 0.9(4)      |
| C6  | C27 | C28 | C29 | -79.9(2)    | C25 | O3  | C24 | C7   | 179.7(2)    |
| C7  | C33 | C6  | C5  | -59.91(19)  | C25 | C26 | O3A | C24  | -1(3)       |
| C7  | C33 | C6  | C27 | 126.01(15)  | C25 | C26 | N4A | C24  | -141(7)     |
| C7  | C33 | C23 | C22 | 3.7(2)      | C26 | N4  | C24 | O3   | 0.0(4)      |
| C7  | C32 | C8  | C9  | -55.86(19)  | C26 | N4  | C24 | C7   | -178.74(19) |
| C7  | C32 | C8  | C18 | 130.53(14)  | C26 | C25 | N4A | C24  | 42(7)       |
| C7  | C32 | C21 | C22 | 3.2(2)      | O3A | C24 | N4A | C25  | -49(8)      |
| C7  | C24 | O3A | C26 | -179.0(7)   | O3A | C24 | N4A | C26  | -21(4)      |
| C7  | C24 | N4A | C25 | 159(3)      | O3A | C26 | N4A | C24  | 18(4)       |
| C7  | C24 | N4A | C26 | -173.0(15)  | O3A | C26 | N4A | C25  | 159(4)      |

**Table 6 Torsion Angles for 3ya.**

| A  | B   | C   | D   | Angle/°     | A   | B   | C   | D   | Angle/° |
|----|-----|-----|-----|-------------|-----|-----|-----|-----|---------|
| C8 | C32 | C7  | C33 | 175.54(13)  | N4A | C24 | O3A | C26 | 24(5)   |
| C8 | C32 | C7  | C24 | -3.0(2)     | N4A | C25 | C26 | O3A | -23(5)  |
| C8 | C32 | C21 | C22 | -174.07(14) | N4A | C26 | O3A | C24 | -16(3)  |
| C8 | C9  | C10 | C11 | 136.74(17)  |     |     |     |     |         |

**Table 7 Hydrogen Atom Coordinates ( $\text{\AA} \times 10^4$ ) and Isotropic Displacement Parameters ( $\text{\AA}^2 \times 10^3$ ) for 3ya.**

| Atom | x     | y    | z    | U(eq) |
|------|-------|------|------|-------|
| H1A  | 7003  | 7624 | 2520 | 124   |
| H1B  | 5533  | 7128 | 2957 | 124   |
| H1C  | 6655  | 6313 | 2543 | 124   |
| H2A  | 9826  | -688 | 3411 | 148   |
| H2B  | 8721  | -882 | 4477 | 148   |
| H30  | 1639  | 1358 | 198  | 96    |
| H31  | 789   | 1899 | 1697 | 90    |
| H3   | 2267  | 2188 | 2851 | 72    |
| H5   | 4752  | 2841 | 2865 | 57    |
| H9   | 9967  | 4067 | 2759 | 55    |
| H11  | 12466 | 4585 | 2579 | 67    |
| H12  | 14049 | 6104 | 1790 | 82    |
| H13  | 13338 | 8230 | 1097 | 84    |
| H14  | 3957  | 1102 | -135 | 100   |
| H15  | 5458  | 1399 | 999  | 84    |
| H16  | 11049 | 8826 | 1188 | 88    |
| H17  | 9437  | 7321 | 1992 | 71    |
| H18A | 8441  | 5221 | 5074 | 57    |
| H18B | 9006  | 6297 | 3948 | 57    |
| H21  | 8263  | 3100 | 5892 | 60    |
| H22  | 7301  | 1167 | 6689 | 63    |
| H23  | 6406  | 351  | 5549 | 60    |
| H25  | 8568  | 4174 | -119 | 101   |
| H25A | 8431  | 3908 | -32  | 101   |
| H26  | 6715  | 5644 | -32  | 101   |
| H27A | 5862  | -195 | 2989 | 66    |
| H27B | 6361  | -558 | 4214 | 66    |
| H29A | 9167  | 163  | 1569 | 141   |
| H29B | 7977  | 1230 | 1380 | 141   |
| H29C | 7668  | -112 | 1450 | 141   |

**Table 7 Hydrogen Atom Coordinates ( $\text{\AA}\times 10^4$ ) and Isotropic Displacement Parameters ( $\text{\AA}^2\times 10^3$ ) for **3ya**.**

| Atom | x    | y    | z    | U(eq) |
|------|------|------|------|-------|
| H20A | 5060 | 6308 | 4866 | 117   |
| H20B | 6272 | 5632 | 5721 | 117   |
| H20C | 5640 | 7297 | 4771 | 87    |
| H20D | 6614 | 6223 | 5672 | 87    |

**Table 8 Atomic Occupancy for **3ya**.**

| Atom | Occupancy | Atom | Occupancy | Atom | Occupancy |
|------|-----------|------|-----------|------|-----------|
| O3   | 0.905(14) | N4   | 0.953(16) | H25  | 0.905(14) |
| H25A | 0.047(16) | H26  | 0.953(16) | O3A  | 0.095(14) |
| N4A  | 0.047(16) | C20  | 0.64(3)   | H20A | 0.64(3)   |
| H20B | 0.64(3)   | C20A | 0.36(3)   | H20C | 0.36(3)   |
| H20D | 0.36(3)   |      |           |      |           |

## 9. Characterization Data and NMR Spectra of Oxazole Derivatives

### 2-(2,6-bis((*E*)-4-methyl-1-phenylpenta-1,4-dien-2-yl)phenyl)-5-methyloxazole (**3aa**)

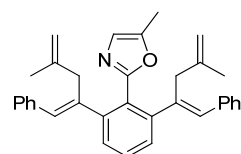

The general procedure was applied to **1a** (8.0 mg, 0.05 mmol), **2a** (19.5 mg, 2.5 equiv),  $\text{Cp}^*\text{Rh}(\text{CH}_3\text{CN})_3(\text{SbF}_6)_2$  (2.9 mg, 7 mol%),  $\text{PhOCH}_2\text{COOH}$  (11.4 mg, 1.5 equiv),  $\text{MnO}_2$  (1.3 mg, 0.3 equiv) in toluene (0.5 mL) at 80 °C for 34 h under Ar. Purification by column chromatography on silica gel (petroleum ether/ethyl acetate = 20/1, v/v) afforded **3aa** as a white solid (18.8 mg, 80% yield). Melting point: 81.4–82.8 °C;  $^1\text{H}$  NMR (400 MHz,  $\text{CDCl}_3$ ):  $\delta$  = 7.32 (s, 3H), 7.25 – 7.11 (m, 10H), 6.75 (s, 1H), 6.53 (s, 2H), 4.72 (s, 4H), 2.94 (s, 4H), 2.20 (s, 3H), 1.58 (s, 6H);  $^{13}\text{C}$  NMR (100 MHz,  $\text{CDCl}_3$ ):  $\delta$  = 159.7, 148.3, 145.5, 142.8, 139.5, 137.7, 132.5, 129.1, 128.6, 128.2, 128.1, 126.7, 125.7, 123.6, 112.5, 40.3, 23.2, 10.9. HRMS (ESI):  $m/z$  calcd for  $\text{C}_{34}\text{H}_{33}\text{ONNa}$   $[\text{M}+\text{Na}]^+$ : 494.2454, found: 494.2464.

### 5-methyl-2-(4-methyl-2,6-bis((*E*)-4-methyl-1-phenylpenta-1,4-dien-2-yl)phenyl)oxazole (**3ba**)

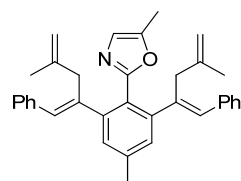

The general procedure was applied to **1b** (17.3 mg, 0.1 mmol), **2a** (39.0 mg, 2.5 equiv),  $\text{Cp}^*\text{Rh}(\text{CH}_3\text{CN})_3(\text{SbF}_6)_2$  (5.9 mg, 7 mol%),  $\text{PhOCH}_2\text{COOH}$  (22.8 mg, 1.5 equiv),  $\text{MnO}_2$  (2.6 mg, 0.3 equiv) in toluene (1.0 mL) at 80 °C for 24 h under Ar. Purification by column chromatography on silica gel (petroleum ether/ethyl acetate = 20/1, v/v) afforded **3ba** as a colorless oil (33.1 mg, 68% yield).  $^1\text{H}$  NMR (400 MHz,  $\text{CDCl}_3$ ):  $\delta$  = 7.23 (d,  $J$  = 7.5 Hz, 4H), 7.21 – 7.10 (m, 8H), 6.72 (s, 1H), 6.51 (s, 2H), 4.71 (s, 4H), 2.90 (s, 4H), 2.35 (s, 3H), 2.19 (s, 3H), 1.58 (s, 6H);  $^{13}\text{C}$  NMR (100 MHz,  $\text{CDCl}_3$ ):  $\delta$  = 160.0, 148.2, 145.5, 142.9, 139.8, 139.0, 137.9, 132.4, 128.9, 128.7, 128.2, 126.7, 123.6, 123.0, 112.4, 40.3, 23.3, 21.7, 11.0. HRMS (ESI):  $m/z$  calcd for  $\text{C}_{35}\text{H}_{35}\text{ONNa}$   $[\text{M}+\text{Na}]^+$ : 508.2611, found: 508.2614.

### 2-(4-methoxy-2,6-bis((*E*)-4-methyl-1-phenylpenta-1,4-dien-2-yl)phenyl)-5-methyloxazole (**3ca**)

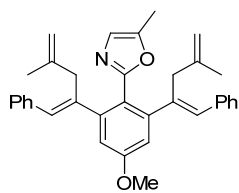

The general procedure was applied to **1c** (18.9 mg, 0.1 mmol), **2a** (39.0 mg, 2.5 equiv), Cp\*Rh(CH<sub>3</sub>CN)<sub>3</sub>(SbF<sub>6</sub>)<sub>2</sub> (5.9 mg, 7 mol%), PhOCH<sub>2</sub>COOH (22.8 mg, 1.5 equiv), MnO<sub>2</sub> (2.6 mg, 0.3 equiv) in toluene (1.0 mL) at 80 °C for 25 h under Ar. Purification by column chromatography on silica gel (petroleum ether/ethyl acetate = 20/1, v/v) afforded **3ca** as a white solid (31.7 mg, 63% yield). Melting point: 61.9–63.2 °C; <sup>1</sup>H NMR (400 MHz, CDCl<sub>3</sub>): δ = 7.35 – 7.28 (m, 4H), 7.25 – 7.23 (m, 3H), 7.23 – 7.20 (m, 3H), 6.92 (s, 2H), 6.78 (d, *J* = 1.3 Hz, 1H), 6.59 (s, 2H), 4.79 (s, 4H), 3.87 (s, 3H), 2.98 (s, 4H), 2.26 (d, *J* = 1.3 Hz, 3H), 1.66 (s, 6H); <sup>13</sup>C NMR (100 MHz, CDCl<sub>3</sub>): δ = 159.9, 159.6, 148.2, 147.1, 143.0, 139.5, 137.7, 132.5, 128.7, 128.2, 126.8, 123.6, 118.6, 113.6, 112.5, 55.4, 40.3, 23.3, 11.0. HRMS (ESI): *m/z* calcd for C<sub>35</sub>H<sub>35</sub>O<sub>2</sub>NNa [M+Na]<sup>+</sup>: 524.2560, found: 524.2563.

### 2-(4-ethoxy-2,6-bis((E)-4-methyl-1-phenylpenta-1,4-dien-2-yl)phenyl)-5-methyloxazole (**3da**)

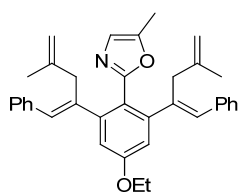

The general procedure was applied to **1d** (20.3 mg, 0.1 mmol), **2a** (39.0 mg, 2.5 equiv), Cp\*Rh(CH<sub>3</sub>CN)<sub>3</sub>(SbF<sub>6</sub>)<sub>2</sub> (5.9 mg, 7 mol%), PhOCH<sub>2</sub>COOH (22.8 mg, 1.5 equiv), MnO<sub>2</sub> (2.6 mg, 0.3 equiv) in toluene (1.0 mL) at 80 °C for 25 h under Ar. Purification by column chromatography on silica gel (petroleum ether/ethyl acetate = 20/1, v/v) afforded **3da** as a white solid (31.5 mg, 61% yield). Melting point: 71.4–72.6 °C; <sup>1</sup>H NMR (400 MHz, CDCl<sub>3</sub>): δ = 7.34 – 7.29 (m, 4H), 7.26 – 7.20 (m, 6H), 6.92 (s, 2H), 6.78 (d, *J* = 1.4 Hz, 1H), 6.59 (s, 2H), 4.79 (s, 4H), 4.10 (q, *J* = 7.0 Hz, 2H), 2.98 (s, 4H), 2.27 (d, *J* = 1.2 Hz, 3H), 1.66 (s, 6H), 1.46 (t, *J* = 7.0 Hz, 3H). <sup>13</sup>C NMR (100 MHz, CDCl<sub>3</sub>): δ = 160.0, 159.0, 148.2, 147.1, 143.0, 139.6, 137.8, 132.4, 128.7, 128.2, 126.8, 123.5, 118.4, 114.1, 112.5, 63.6, 40.3, 23.3, 14.9, 11.0. HRMS (ESI): *m/z* calcd for C<sub>36</sub>H<sub>37</sub>O<sub>2</sub>NNa [M+Na]<sup>+</sup>: 538.2717, found: 538.2721.

### 2-(4-isopropyl-2,6-bis((E)-4-methyl-1-phenylpenta-1,4-dien-2-yl)phenyl)-5-methyloxazole (**3ea**)

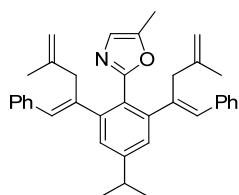

The general procedure was applied to **1e** (20.1 mg, 0.1 mmol), **2a** (39.0 mg, 2.5 equiv), Cp\*Rh(CH<sub>3</sub>CN)<sub>3</sub>(SbF<sub>6</sub>)<sub>2</sub> (5.9 mg, 7 mol%), PhOCH<sub>2</sub>COOH (22.8 mg, 1.5 equiv), MnO<sub>2</sub> (2.6 mg, 0.3 equiv) in toluene (1.0 mL) at 80 °C for 40 h under Ar. Purification by column chromatography on silica gel (petroleum ether/ethyl acetate = 20/1, v/v) afforded **3ea** as a colorless oil (26.7 mg, 52% yield). <sup>1</sup>H NMR (400 MHz, CDCl<sub>3</sub>): δ = 7.35 – 7.28 (m, 4H), 7.26 – 7.19 (m, 8H), 6.79 (d, *J* = 1.4 Hz, 1H), 6.57 (s, 2H), 4.77 (s, 4H), 3.05 – 2.92 (m, 5H), 2.27 (d, *J* = 1.2 Hz, 3H), 1.65 (s, 6H), 1.31 (d, *J* = 6.9 Hz, 6H). <sup>13</sup>C NMR (100 MHz, CDCl<sub>3</sub>): δ = 160.1, 149.7, 148.2, 145.4, 143.1, 139.9, 137.9, 132.3, 128.7, 128.2, 126.7, 126.3, 123.5, 123.3, 112.4, 40.4, 34.1, 23.9, 23.3, 11.0. HRMS (ESI): *m/z* calcd for C<sub>37</sub>H<sub>39</sub>ONNa [M+Na]<sup>+</sup>: 536.2924, found: 536.2927.

### 3,5-bis((E)-4-methyl-1-phenylpenta-1,4-dien-2-yl)-4-(5-methyloxazol-2-yl)benzotrile (**3fa**)

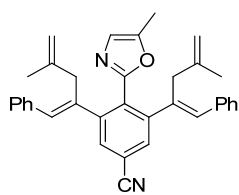

The general procedure was applied to **1f** (18.4 mg, 0.1 mmol), **2a** (39.0 mg, 2.5 equiv), Cp\*Rh(CH<sub>3</sub>CN)<sub>3</sub>(SbF<sub>6</sub>)<sub>2</sub> (5.9 mg, 7 mol%), PhOCH<sub>2</sub>COOH (22.8 mg, 1.5 equiv), MnO<sub>2</sub> (2.6 mg, 0.3 equiv) in toluene (1.0 mL) at 80 °C for 25 h under Ar. Purification by column chromatography on silica gel (petroleum ether/ethyl acetate = 15/1, v/v) afforded **3fa** as a colorless oil

(31.1 mg, 63% yield). <sup>1</sup>H NMR (400 MHz, CDCl<sub>3</sub>): δ = 7.64 (s, 2H), 7.33 (t, *J* = 7.3 Hz, 4H), 7.28 – 7.26 (m, 1H), 7.26 – 7.20 (m, 5H), 6.86 (d, *J* = 1.4 Hz, 1H), 6.58 (s, 2H), 4.76 (d, *J* = 31.7 Hz, 4H), 2.96 (s, 4H), 2.30 (d, *J* = 1.2 Hz, 3H), 1.64 (s, 6H). <sup>13</sup>C NMR (100 MHz, CDCl<sub>3</sub>): δ = 157.9, 149.2, 146.6, 142.2, 137.8, 137.0, 133.9, 131.5, 130.3, 128.6, 128.4, 127.3, 124.1, 118.7, 113.1, 40.1, 23.2, 11.0. HRMS (ESI): *m/z* calcd for C<sub>35</sub>H<sub>32</sub>ON<sub>2</sub>Na [M+Na]<sup>+</sup>: 519.2407, found: 519.2411.

**2-(2,6-bis(*E*)-4-methyl-1-phenylpenta-1,4-dien-2-yl)-4-(trifluoromethyl)phenyl)-5-methyloxazole (3ga)**

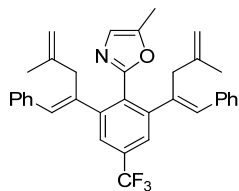

The general procedure was applied to **1g** (22.7 mg, 0.1 mmol), **2a** (39.0 mg, 2.5 equiv), Cp\*Rh(CH<sub>3</sub>CN)<sub>3</sub>(SbF<sub>6</sub>)<sub>2</sub> (5.9 mg, 7 mol%), PhOCH<sub>2</sub>COOH (22.8 mg, 1.5 equiv), MnO<sub>2</sub> (2.6 mg, 0.3 equiv) in toluene (1.0 mL) at 80 °C for 51 h under Ar. Purification by column chromatography on silica gel (petroleum ether/ethyl acetate = 20/1, v/v) afforded **3ga** as a colorless oil (34.6 mg, 64% yield). <sup>1</sup>H NMR (400 MHz, CDCl<sub>3</sub>): δ = 7.61 (s, 2H), 7.36 – 7.30 (m, 4H), 7.26 – 7.22 (m, 6H), 6.85 (d, *J* = 1.3 Hz, 1H), 6.61 (s, 2H), 4.76 (d, *J* = 20.6 Hz, 4H), 3.00 (s, 4H), 2.30 (d, *J* = 1.2 Hz, 3H), 1.64 (s, 6H). <sup>13</sup>C NMR (100 MHz, CDCl<sub>3</sub>): δ = 158.5, 149.0, 146.3, 142.4, 138.5, 137.3, 133.6, 131.1 (q, *J* = 32.1 Hz), 129.3 (d, *J* = 0.9 Hz), 128.7, 128.3, 127.1, 124.8 (q, *J* = 3.8 Hz), 124.0 (q, *J* = 271.3 Hz), 123.9, 113.0, 40.2, 23.1, 11.0. <sup>19</sup>F NMR (376 MHz, CDCl<sub>3</sub>): δ = -62.79. HRMS (ESI): *m/z* calcd for C<sub>35</sub>H<sub>32</sub>ONF<sub>3</sub>Na [M+Na]<sup>+</sup>: 562.2328, found: 562.2338.

**2-(4-fluoro-2,6-bis(*E*)-4-methyl-1-phenylpenta-1,4-dien-2-yl)phenyl)-5-methyloxazole (3ha)**

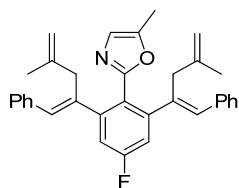

The general procedure was applied to **1h** (17.7 mg, 0.1 mmol), **2a** (39.0 mg, 2.5 equiv), Cp\*Rh(CH<sub>3</sub>CN)<sub>3</sub>(SbF<sub>6</sub>)<sub>2</sub> (5.9 mg, 7 mol%), PhOCH<sub>2</sub>COOH (22.8 mg, 1.5 equiv), MnO<sub>2</sub> (2.6 mg, 0.3 equiv) in toluene (1.0 mL) at 80 °C for 24 h under Ar. Purification by column chromatography on silica gel (petroleum ether/ethyl acetate = 20/1, v/v) afforded **3ha** as a colorless oil (36.7 mg, 75% yield). <sup>1</sup>H NMR (400 MHz, CDCl<sub>3</sub>): δ = 7.36 – 7.29 (m, 4H), 7.26 – 7.20 (m, 6H), 7.10 (d, *J* = 9.3 Hz, 2H), 6.81 (s, 1H), 6.58 (s, 2H), 4.80 (d, *J* = 13.5 Hz, 4H), 2.98 (s, 4H), 2.28 (s, 3H), 1.66 (s, 6H). <sup>13</sup>C NMR (100 MHz, CDCl<sub>3</sub>): δ = 162.5 (d, *J* = 248.2 Hz), 159.0, 148.4, 147.9 (d, *J* = 8.5 Hz), 142.5, 138.4 (d, *J* = 1.6 Hz), 137.3, 133.1, 128.5, 128.2, 126.9, 123.6, 122.1 (d, *J* = 2.8 Hz), 114.9 (d, *J* = 21.7 Hz), 112.7, 40.1, 23.1, 10.9. <sup>19</sup>F NMR (376 MHz, CDCl<sub>3</sub>): δ = -111.51 (t, *J* = 9.3 Hz). HRMS (ESI): *m/z* calcd for C<sub>34</sub>H<sub>32</sub>ONFNa [M+Na]<sup>+</sup>: 512.2360, found: 512.2362.

**2-(4-chloro-2,6-bis(*E*)-4-methyl-1-phenylpenta-1,4-dien-2-yl)phenyl)-5-methyloxazole (3ia)**

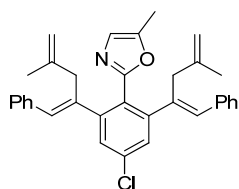

The general procedure was applied to **1i** (19.3 mg, 0.1 mmol), **2a** (39.0 mg, 2.5 equiv), Cp\*Rh(CH<sub>3</sub>CN)<sub>3</sub>(SbF<sub>6</sub>)<sub>2</sub> (5.9 mg, 7 mol%), PhOCH<sub>2</sub>COOH (22.8 mg, 1.5 equiv), MnO<sub>2</sub> (2.6 mg, 0.3 equiv) in toluene (1.0 mL) at 80 °C for 18 h under Ar. Purification by column chromatography on silica gel (petroleum ether/ethyl acetate = 20/1, v/v) afforded **3ia** as a white solid (38.4 mg, 76% yield). Melting point: 74.1–75.3 °C; <sup>1</sup>H NMR (400 MHz, CDCl<sub>3</sub>): δ = 7.29 (s, 2H), 7.23 (d, *J* = 7.4 Hz, 3H), 7.19 – 7.11 (m, 7H), 6.74 (s, 1H), 6.51 (s, 2H), 4.70 (d, *J* = 17.5 Hz, 4H), 2.88 (s, 4H), 2.19 (s, 3H), 1.57 (s, 6H). <sup>13</sup>C NMR (100 MHz, CDCl<sub>3</sub>): δ = 158.8, 148.7, 147.1,

142.5, 138.5, 137.4, 135.0, 133.3, 128.6, 128.3, 128.0, 127.0, 124.5, 123.8, 112.8, 40.1, 23.2, 11.0. HRMS (ESI):  $m/z$  calcd for  $C_{34}H_{32}ONCINa$   $[M+Na]^+$ : 528.2065, found: 528.2070.

**methyl 3,5-bis(*E*)-4-methyl-1-phenylpenta-1,4-dien-2-yl)-4-(5-methyloxazol-2-yl)benzoate (3ja)**

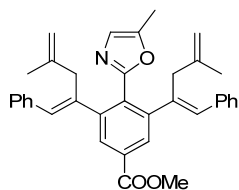

The general procedure was applied to **1j** (21.7 mg, 0.1 mmol), **2a** (39.0 mg, 2.5 equiv),  $Cp^*Rh(CH_3CN)_3(SbF_6)_2$  (5.9 mg, 7 mol%),  $PhOCH_2COOH$  (22.8 mg, 1.5 equiv),  $MnO_2$  (2.6 mg, 0.3 equiv) in toluene (1.0 mL) at 80 °C for 18 h under Ar. Purification by column chromatography on silica gel (petroleum ether/ethyl acetate = 20/1, v/v) afforded **3ja** as a white solid (44.2 mg, 84% yield). Melting point: 104.0–104.9°C;  $^1H$  NMR (400 MHz,  $CDCl_3$ ):  $\delta$  = 7.98 (s, 2H), 7.32 – 7.27 (m, 3H), 7.24 – 7.15 (m, 7H), 6.81 (s, 1H), 6.57 (s, 2H), 4.69 (d,  $J$  = 8.0 Hz, 4H), 3.92 (s, 3H), 2.92 (s, 4H), 2.25 (s, 3H), 1.57 (s, 6H).  $^{13}C$  NMR (100 MHz,  $CDCl_3$ ):  $\delta$  = 166.8, 158.8, 148.9, 145.8, 142.5, 139.1, 137.5, 133.2, 130.6, 130.0, 129.2, 128.7, 128.3, 126.9, 123.9, 112.8, 52.5, 40.1, 23.2, 11.0. HRMS (ESI):  $m/z$  calcd for  $C_{36}H_{35}O_3NNa$   $[M+Na]^+$ : 552.2509, found: 552.2512.

**(*E*)-5-methyl-2-(3-(4-methyl-1-phenylpenta-1,4-dien-2-yl)-[1,1'-biphenyl]-2-yl)oxazole (3ka)**

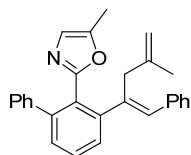

The general procedure was applied to **1k** (23.5 mg, 0.1 mmol), **2a** (39.0 mg, 2.5 equiv),  $Cp^*Rh(CH_3CN)_3(SbF_6)_2$  (5.9 mg, 7 mol%),  $PhOCH_2COOH$  (22.8 mg, 1.5 equiv),  $MnO_2$  (2.6 mg, 0.3 equiv) in toluene (1.0 mL) at 80 °C for 18 h under Ar. Purification by column chromatography on silica gel (petroleum ether/ethyl acetate = 20/1, v/v) afforded **3ka** as a colorless oil (32.1 mg, 82% yield).  $^1H$  NMR (400 MHz,  $CDCl_3$ ):  $\delta$  = 7.46 – 7.36 (m, 2H), 7.34 – 7.28 (m, 1H), 7.25 – 7.09 (m, 10H), 6.57 (d,  $J$  = 14.9 Hz, 2H), 4.71 (s, 2H), 2.91 (s, 2H), 2.06 (s, 3H), 1.58 (s, 3H).  $^{13}C$  NMR (100 MHz,  $CDCl_3$ ):  $\delta$  = 159.4, 148.3, 145.7, 143.5, 142.8, 141.2, 139.5, 137.8, 132.9, 129.6, 128.9, 128.8, 128.7, 128.5, 128.2, 128.0, 126.9, 126.8, 126.4, 123.3, 112.5, 40.2, 23.3, 10.8. HRMS (ESI):  $m/z$  calcd for  $C_{28}H_{25}ONNa$   $[M+Na]^+$ : 414.1828, found: 414.1835.

**(*E*)-2-(2-fluoro-6-(4-methyl-1-phenylpenta-1,4-dien-2-yl)phenyl)-5-methyloxazole (3la)**

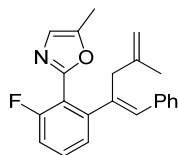

The general procedure was applied to **1l** (17.7 mg, 0.1 mmol), **2a** (39.0 mg, 2.5 equiv),  $Cp^*Rh(CH_3CN)_3(SbF_6)_2$  (5.9 mg, 7 mol%),  $PhOCH_2COOH$  (22.8 mg, 1.5 equiv),  $MnO_2$  (2.6 mg, 0.3 equiv) in toluene (1.0 mL) at 80 °C for 18 h under Ar. Purification by column chromatography on silica gel (petroleum ether/ethyl acetate = 20/1, v/v) afforded **3la** as a colorless oil (29.0 mg, 87% yield).  $^1H$  NMR (400 MHz,  $CDCl_3$ ):  $\delta$  = 7.47 – 7.40 (m, 1H), 7.40 – 7.33 (m, 2H), 7.32 – 7.27 (m, 4H), 7.14 (t,  $J$  = 8.9 Hz, 1H), 6.94 (s, 1H), 6.64 (s, 1H), 4.75 (d,  $J$  = 17.3 Hz, 2H), 3.01 (s, 2H), 2.38 (s, 3H), 1.65 (s, 3H);  $^{13}C$  NMR (100 MHz,  $CDCl_3$ ):  $\delta$  = 161.1 (d,  $J$  = 250.2 Hz), 155.4, 149.5, 146.8, 142.6, 138.7 (d,  $J$  = 2.3 Hz), 137.5, 133.1, 131.1 (d,  $J$  = 9.1 Hz), 128.7, 128.3, 127.1, 125.3 (d,  $J$  = 3.1 Hz), 124.2, 115.7 (d,  $J$  = 13.9 Hz), 114.6 (d,  $J$  = 22 Hz), 112.7, 40.0, 23.1, 11.1.  $^{19}F$  NMR (376 MHz,  $CDCl_3$ ):  $\delta$  = -113.13. HRMS (ESI):  $m/z$  calcd for  $C_{22}H_{20}ONFNa$   $[M+Na]^+$ : 356.1421, found: 356.1427.

**(*E*)-2-(2-iodo-6-(4-methyl-1-phenylpenta-1,4-dien-2-yl)phenyl)-5-methyloxazole (3ma)**

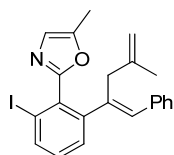

The general procedure was applied to **1m** (28.4 mg, 0.1 mmol), **2a** (39.0 mg, 2.5 equiv), Cp\*Rh(CH<sub>3</sub>CN)<sub>3</sub>(SbF<sub>6</sub>)<sub>2</sub> (5.9 mg, 7 mol%), PhOCH<sub>2</sub>COOH (22.8 mg, 1.5 equiv), MnO<sub>2</sub> (2.6 mg, 0.3 equiv) in toluene (1.0 mL) at 80 °C for 33 h under Ar. Purification by column chromatography on silica gel (petroleum ether/ethyl acetate = 20/1, v/v) afforded **3ma** as a white solid (33.8 mg, 77% yield). Melting point: 64.5–65.8 °C; <sup>1</sup>H NMR (400 MHz, CDCl<sub>3</sub>): δ = 7.85 (d, *J* = 7.9 Hz, 1H), 7.42 (d, *J* = 7.7 Hz, 1H), 7.31 (t, *J* = 7.5 Hz, 2H), 7.25 – 7.16 (m, 3H), 7.13 (t, *J* = 7.8 Hz, 1H), 6.87 (s, 1H), 6.55 (s, 1H), 4.76 (d, *J* = 15.7 Hz, 2H), 2.94 (s, 2H), 2.36 (s, 3H), 1.63 (s, 3H). <sup>13</sup>C NMR (100 MHz, CDCl<sub>3</sub>): δ = 160.4, 148.8, 147.3, 142.5, 138.5, 137.9, 137.3, 133.6, 133.1, 131.1, 129.0, 128.6, 128.3, 127.1, 123.5, 112.8, 99.4, 40.0, 23.2, 11.1. HRMS (ESI): *m/z* calcd for C<sub>22</sub>H<sub>21</sub>ONI [M+H]<sup>+</sup>: 442.0662, found: 442.0661.

### (*E*)-5-methyl-2-(2-methyl-6-(4-methyl-1-phenylpenta-1,4-dien-2-yl)phenyl)oxazole (**3na**)

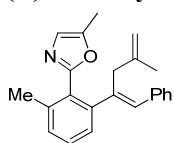

The general procedure was applied to **1n** (17.3 mg, 0.1 mmol), **2a** (39.0 mg, 2.5 equiv), Cp\*Rh(CH<sub>3</sub>CN)<sub>3</sub>(SbF<sub>6</sub>)<sub>2</sub> (5.9 mg, 7 mol%), PhOCH<sub>2</sub>COOH (22.8 mg, 1.5 equiv), MnO<sub>2</sub> (2.6 mg, 0.3 equiv) in toluene (1.0 mL) at 80 °C for 18 h under Ar. Purification by column chromatography on silica gel (petroleum ether/ethyl acetate = 20/1, v/v) afforded **3na** as a colorless oil (19.9 mg, 60% yield). <sup>1</sup>H NMR (400 MHz, CDCl<sub>3</sub>): δ = 7.36 – 7.27 (m, 4H), 7.25 – 7.18 (m, 4H), 6.86 (d, *J* = 1.5 Hz, 1H), 6.56 (s, 1H), 4.76 (s, 2H), 2.94 (s, 2H), 2.33 (s, 6H), 1.63 (s, 3H). <sup>13</sup>C NMR (100 MHz, CDCl<sub>3</sub>): δ = 159.9, 148.5, 145.3, 142.9, 139.8, 138.8, 137.9, 132.5, 129.5, 129.1, 128.6, 128.2, 127.0, 126.9, 126.7, 123.4, 112.5, 40.0, 23.2, 20.5, 11.0. HRMS (ESI): *m/z* calcd for C<sub>23</sub>H<sub>23</sub>ONNa [M+Na]<sup>+</sup>: 352.1672, found: 352.1677.

### 2-(3-fluoro-2,6-bis((*E*)-4-methyl-1-phenylpenta-1,4-dien-2-yl)phenyl)-5-methyloxazole (**3oa**)

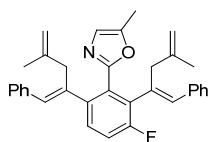

The general procedure was applied to **1o** (17.7 mg, 0.1 mmol), **2a** (39.0 mg, 2.5 equiv), Cp\*Rh(CH<sub>3</sub>CN)<sub>3</sub>(SbF<sub>6</sub>)<sub>2</sub> (5.9 mg, 7 mol%), PhOCH<sub>2</sub>COOH (22.8 mg, 1.5 equiv), MnO<sub>2</sub> (2.6 mg, 0.3 equiv) in toluene (1.0 mL) at 80 °C for 24 h under Ar. Purification by column chromatography on silica gel (petroleum ether/ethyl acetate = 20/1, v/v) afforded **3oa** as a colorless oil (36.5 mg, 75% yield). <sup>1</sup>H NMR (400 MHz, CDCl<sub>3</sub>): δ = 7.42 – 7.33 (m, 5H), 7.33 – 7.27 (m, 6H), 7.21 (t, *J* = 8.9 Hz, 1H), 6.88 (s, 1H), 6.70 (s, 1H), 6.61 (s, 1H), 4.81 (d, *J* = 12.8 Hz, 2H), 4.69 (d, *J* = 8.3 Hz, 2H), 3.06 (s, 2H), 3.00 (s, 2H), 2.34 (s, 3H), 1.66 (d, *J* = 16.0 Hz, 6H). <sup>13</sup>C NMR (100 MHz, CDCl<sub>3</sub>): δ = 158.9 (d, *J* = 243.3 Hz), 158.5 (d, *J* = 1.2 Hz), 148.7, 142.7 (d, *J* = 21.7 Hz), 141.5 (d, *J* = 3.7 Hz), 138.9, 137.6 (d, *J* = 21.7 Hz), 134.5, 133.2, 132.8, 132.3 (d, *J* = 17.2 Hz), 129.4 (d, *J* = 8.6 Hz), 128.7 (d, *J* = 19.9 Hz), 128.2 (d, *J* = 2.9 Hz), 126.9 (d, *J* = 7.2 Hz), 123.7, 116.8 (d, *J* = 23.5 Hz), 112.7, 112.6 (d, *J* = 1.6 Hz), 40.3, 23.2, 22.8 (d, *J* = 1.7 Hz), 11.0. <sup>19</sup>F NMR (376 MHz, CDCl<sub>3</sub>): δ = -114.17 (dd, *J* = 9.1, 5.3 Hz). HRMS (ESI): *m/z* calcd for C<sub>34</sub>H<sub>32</sub>ONFNa [M+Na]<sup>+</sup>: 512.2360, found: 512.2371.

### (*E*)-5-methyl-2-(5-methyl-2-(4-methyl-1-phenylpenta-1,4-dien-2-yl)phenyl)oxazole (**3pa**)

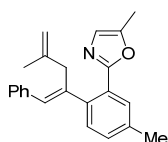

The general procedure was applied to **1p** (17.3 mg, 0.1 mmol), **2a** (39.0 mg, 2.5 equiv), Cp\*Rh(CH<sub>3</sub>CN)<sub>3</sub>(SbF<sub>6</sub>)<sub>2</sub> (5.9 mg, 7 mol%), PhOCH<sub>2</sub>COOH (22.8 mg, 1.5 equiv), MnO<sub>2</sub> (2.6 mg, 0.3 equiv) in toluene (1.0 mL) at 80 °C for 18 h under Ar.

Purification by column chromatography on silica gel (petroleum ether/ethyl acetate = 20/1, v/v) afforded **3pa** as a colorless oil (23.4 mg, 71% yield). <sup>1</sup>H NMR (400 MHz, CDCl<sub>3</sub>): δ = 7.68 (s, 1H), 7.31 (d, *J* = 4.4 Hz, 4H), 7.25 – 7.15 (m, 3H), 6.80 (s, 1H), 6.54 (s, 1H), 4.64 (d, *J* = 15.0 Hz, 2H), 3.11 (s, 2H), 2.32 (d, *J* = 27.6 Hz, 6H), 1.55 (s, 3H). <sup>13</sup>C NMR (100 MHz, CDCl<sub>3</sub>): δ = 161.3, 148.9, 143.0, 140.7, 140.6, 138.1, 137.0, 131.3, 130.5, 130.4, 129.9, 128.7, 128.3, 126.7, 126.0, 124.1, 112.3, 40.7, 23.2, 21.1, 11.1. HRMS (ESI): *m/z* calcd for C<sub>23</sub>H<sub>23</sub>ONNa [M+Na]<sup>+</sup>: 352.1672, found: 352.1677.

**(E)-2-(5-bromo-2-(4-methyl-1-phenylpenta-1,4-dien-2-yl)phenyl)-5-methyloxazole (3qa)**

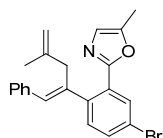

The general procedure was applied to **1q** (23.6 mg, 0.1 mmol), **2a** (39.0 mg, 2.5 equiv), Cp\*Rh(CH<sub>3</sub>CN)<sub>3</sub>(SbF<sub>6</sub>)<sub>2</sub> (5.9 mg, 7 mol%), PhOCH<sub>2</sub>COOH (22.8 mg, 1.5 equiv), MnO<sub>2</sub> (2.6 mg, 0.3 equiv) in toluene (1.0 mL) at 80 °C for 18 h under Ar.

Purification by column chromatography on silica gel (petroleum ether/ethyl acetate = 20/1, v/v) afforded **3qa** as a colorless oil (37.2 mg, 95% yield). <sup>1</sup>H NMR (400 MHz, CDCl<sub>3</sub>): δ = 7.52 (d, *J* = 8.0 Hz, 1H), 7.33 (d, *J* = 6.7 Hz, 1H), 7.25 – 7.09 (m, 6H), 6.81 (s, 1H), 6.50 (s, 1H), 4.69 (d, *J* = 15.0 Hz, 2H), 2.88 (s, 2H), 2.28 (s, 3H), 1.57 (s, 3H). <sup>13</sup>C NMR (100 MHz, CDCl<sub>3</sub>): δ = 158.6, 149.0, 147.6, 142.5, 138.4, 137.3, 133.6, 131.5, 130.9, 129.0, 128.6, 128.3, 128.2, 127.1, 124.8, 123.6, 112.8, 39.9, 23.2, 11.1. HRMS (ESI): *m/z* calcd for C<sub>22</sub>H<sub>20</sub>ONBrNa [M+Na]<sup>+</sup>: 416.0620, found: 416.0625.

**(E)-2-(5-iodo-2-(4-methyl-1-phenylpenta-1,4-dien-2-yl)phenyl)-5-methyloxazole (3ra)**

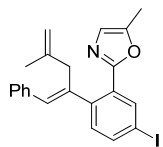

The general procedure was applied to **1r** (28.4 mg, 0.1 mmol), **2a** (39.0 mg, 2.5 equiv), Cp\*Rh(CH<sub>3</sub>CN)<sub>3</sub>(SbF<sub>6</sub>)<sub>2</sub> (5.9 mg, 7 mol%), PhOCH<sub>2</sub>COOH (22.8 mg, 1.5 equiv), MnO<sub>2</sub> (2.6 mg, 0.3 equiv) in toluene (1.0 mL) at 80 °C for 18 h under Ar.

Purification by column chromatography on silica gel (petroleum ether/ethyl acetate = 20/1, v/v) afforded **3ra** as a colorless oil (35.5 mg, 80% yield). <sup>1</sup>H NMR (400 MHz, CDCl<sub>3</sub>): δ = 8.13 (d, *J* = 2.0 Hz, 1H), 7.59 (dd, *J* = 8.1, 2.0 Hz, 1H), 7.25 – 7.20 (m, 4H), 7.18 – 7.09 (m, 1H), 6.99 (d, *J* = 8.1 Hz, 1H), 6.73 (s, 1H), 6.46 (s, 1H), 4.54 (d, *J* = 32.4 Hz, 2H), 3.03 (s, 2H), 2.22 (s, 3H), 1.46 (s, 3H). <sup>13</sup>C NMR (100 MHz, CDCl<sub>3</sub>): δ = 159.4, 149.4, 142.8, 142.7, 139.9, 138.4, 137.8, 137.6, 132.4, 131.8, 128.7, 128.4, 128.1, 127.0, 124.4, 112.6, 92.2, 40.5, 23.2, 11.1. HRMS (ESI): *m/z* calcd for C<sub>22</sub>H<sub>20</sub>ONINa [M+Na]<sup>+</sup>: 464.0482, found: 464.0489.

**(E)-2-(2,4-dimethoxy-6-(4-methyl-1-phenylpenta-1,4-dien-2-yl)phenyl)-5-methyloxazole (3sa)**

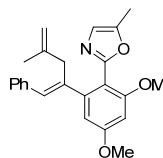

The general procedure was applied to **1s** (21.9 mg, 0.1 mmol), **2a** (39.0 mg, 2.5 equiv), Cp\*Rh(CH<sub>3</sub>CN)<sub>3</sub>(SbF<sub>6</sub>)<sub>2</sub> (5.9 mg, 7 mol%), PhOCH<sub>2</sub>COOH (22.8 mg, 1.5 equiv), MnO<sub>2</sub> (2.6 mg, 0.3 equiv) in toluene (1.0 mL) at 80 °C for 39 h under Ar.

Purification by column chromatography on silica gel (petroleum ether/ethyl acetate = 5/1, v/v) afforded **3sa** as a white solid (16.0 mg, 43% yield). Melting point: 79.1–80.3°C; <sup>1</sup>H NMR (400 MHz, CDCl<sub>3</sub>): δ = 7.34 – 7.27 (m, 2H), 7.24 – 7.18 (m, 3H), 6.83 (d, *J* = 1.4 Hz, 1H), 6.59 (s, 2H), 6.46 (d, *J* = 2.3 Hz, 1H), 4.76 (s, 2H), 3.86 (s, 3H), 3.80 (s, 3H), 2.91 (s, 2H), 2.31 (d, *J* = 1.2 Hz, 3H), 1.63 (s, 3H). <sup>13</sup>C NMR (100 MHz, CDCl<sub>3</sub>): δ = 161.5, 159.9, 157.8, 148.6, 147.8, 143.0, 139.3, 137.7, 132.6, 128.7, 128.2, 126.8, 123.6, 112.5, 109.6, 106.3, 97.2, 56.2, 55.5, 39.9, 23.3, 11.2. HRMS (ESI): *m/z* calcd for C<sub>24</sub>H<sub>25</sub>O<sub>3</sub>NNa [M+Na]<sup>+</sup>: 398.1727, found: 398.1732.



### 2-(2,6-bis((*E*)-4-methyl-1-phenylpenta-1,4-dien-2-yl)phenyl)-5-(tert-butyl)oxazole (3ta)

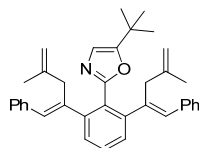

The general procedure was applied to **1t** (20.1 mg, 0.1 mmol), **2a** (39.0 mg, 2.5 equiv), Cp\*Rh(CH<sub>3</sub>CN)<sub>3</sub>(SbF<sub>6</sub>)<sub>2</sub> (5.9 mg, 7 mol%), PhOCH<sub>2</sub>COOH (22.8 mg, 1.5 equiv), MnO<sub>2</sub> (2.6 mg, 0.3 equiv) in toluene (1.0 mL) at 80 °C for 18 h under Ar. Purification by column chromatography on silica gel (petroleum ether/ethyl acetate = 20/1, v/v) afforded **3ta** as a white solid (36.7 mg, 71% yield). Melting point: 88.2–90.4°C; <sup>1</sup>H NMR (400 MHz, CDCl<sub>3</sub>): δ = 7.37 – 7.30 (m, 3H), 7.25 – 7.12 (m, 10H), 6.70 (s, 1H), 6.55 (s, 2H), 4.76 (d, *J* = 7.3 Hz, 4H), 2.89 (s, 4H), 1.61 (s, 6H), 1.10 (s, 9H). <sup>13</sup>C NMR (100 MHz, CDCl<sub>3</sub>): δ = 160.9, 159.4, 145.6, 143.0, 139.5, 137.7, 132.7, 129.2, 128.7, 128.2, 128.2, 126.8, 125.8, 120.4, 112.4, 40.2, 31.4, 28.8, 23.4. HRMS (ESI): *m/z* calcd for C<sub>37</sub>H<sub>39</sub>ONNa [M+Na]<sup>+</sup>:536.2924, found:536.2931.

### 2-(2,6-bis((*E*)-4-methyl-1-phenylpenta-1,4-dien-2-yl)phenyl)-5-phenyloxazole (3ua)

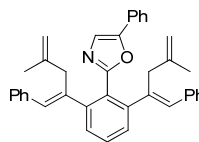

The general procedure was applied to **1u** (22.1 mg, 0.1 mmol), **2a** (39.0 mg, 2.5 equiv), Cp\*Rh(CH<sub>3</sub>CN)<sub>3</sub>(SbF<sub>6</sub>)<sub>2</sub> (5.9 mg, 7 mol%), PhOCH<sub>2</sub>COOH (22.8 mg, 1.5 equiv), MnO<sub>2</sub> (2.6 mg, 0.3 equiv) in toluene (1.0 mL) at 80 °C for 18 h under Ar. Purification by column chromatography on silica gel (petroleum ether/ethyl acetate = 20/1, v/v) afforded **3ua** as a white solid (35.6 mg, 67% yield). Melting point: 103.4–104.8°C; <sup>1</sup>H NMR (400 MHz, CDCl<sub>3</sub>): δ = 7.59 (d, *J* = 7.5 Hz, 2H), 7.51 – 7.41 (m, 4H), 7.38 – 7.27 (m, 11H), 7.25 – 7.19 (m, 2H), 6.72 (s, 2H), 4.81 (s, 4H), 3.03 (s, 4H), 1.66 (s, 6H); <sup>13</sup>C NMR (100 MHz, CDCl<sub>3</sub>): δ = 160.4, 151.2, 145.7, 142.9, 139.9, 137.7, 132.7, 129.5, 129.0, 128.7, 128.6, 128.4, 128.2, 128.1, 126.8, 125.0, 124.3, 122.9, 112.5, 40.4, 23.3. HRMS (ESI): *m/z* calcd for C<sub>39</sub>H<sub>35</sub>ONNa [M+Na]<sup>+</sup>: 556.2611, found: 556.2619.

### 2-(2,6-bis((*E*)-4-methyl-1-phenylpenta-1,4-dien-2-yl)phenyl)-5-(4-methoxyphenyl)oxazole (3va)

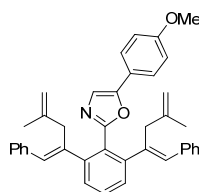

The general procedure was applied to **1v** (25.1 mg, 0.1 mmol), **2a** (39.0 mg, 2.5 equiv), Cp\*Rh(CH<sub>3</sub>CN)<sub>3</sub>(SbF<sub>6</sub>)<sub>2</sub> (5.9 mg, 7 mol%), PhOCH<sub>2</sub>COOH (22.8 mg, 1.5 equiv), MnO<sub>2</sub> (2.6 mg, 0.3 equiv) in toluene (1.0 mL) at 80 °C for 18 h under Ar. Purification by column chromatography on silica gel (petroleum ether/ethyl acetate = 20/1, v/v) afforded **3va** as a white solid (34.7 mg, 62% yield). Melting point: 102.1–103.3°C; <sup>1</sup>H NMR (400 MHz, CDCl<sub>3</sub>): δ = 7.50 (d, *J* = 7.0 Hz, 2H), 7.47 – 7.40 (m, 3H), 7.34 – 7.25 (m, 9H), 7.25 – 7.19 (m, 2H), 6.87 (d, *J* = 7.8 Hz, 2H), 6.70 (d, *J* = 1.8 Hz, 2H), 4.80 (s, 4H), 3.82 (s, 3H), 3.01 (s, 4H), 1.64 (s, 6H). <sup>13</sup>C NMR (100 MHz, CDCl<sub>3</sub>): δ = 159.8, 159.7, 151.2, 145.6, 142.9, 140.0, 137.7, 132.6, 129.4, 128.7, 128.6, 128.2, 126.8, 125.8, 125.2, 121.4, 121.0, 114.4, 112.5, 55.4, 40.4, 23.3. HRMS (ESI): *m/z* calcd for C<sub>40</sub>H<sub>37</sub>O<sub>2</sub>NNa [M+Na]<sup>+</sup>:586.2717, found:586.2725.

### 2-(2,6-bis((*E*)-4-methyl-1-phenylpenta-1,4-dien-2-yl)phenyl)-5-(3-chlorophenyl)oxazole (3wa)

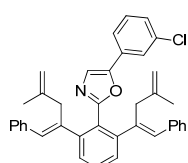

The general procedure was applied to **1w** (25.5 mg, 0.1 mmol), **2a** (39.0 mg, 2.5 equiv), Cp\*Rh(CH<sub>3</sub>CN)<sub>3</sub>(SbF<sub>6</sub>)<sub>2</sub> (5.9 mg, 7 mol%), PhOCH<sub>2</sub>COOH (22.8 mg, 1.5 equiv), MnO<sub>2</sub> (2.6 mg, 0.3 equiv) in toluene (1.0 mL) at 80 °C for 18 h under Ar. Purification by column chromatography on silica gel (petroleum

ether/ethyl acetate = 20/1, v/v) afforded **3wa** as a white solid (30.7 mg, 54% yield). Melting point: 107.8–109.9°C; <sup>1</sup>H NMR (400 MHz, CDCl<sub>3</sub>): δ = 7.52 (s, 1H), 7.45 – 7.35 (m, 5H), 7.25 – 7.19 (m, 10H), 7.16 (t, *J* = 7.1 Hz, 2H), 6.62 (s, 2H), 4.74 (s, 4H), 2.95 (s, 4H), 1.59 (s, 6H). <sup>13</sup>C NMR (100 MHz, CDCl<sub>3</sub>): δ = 161.0, 149.8, 145.7, 142.8, 139.7, 137.6, 135.1, 132.8, 130.3, 129.7, 129.7, 128.7, 128.6, 128.3, 128.3, 126.9, 124.8, 124.2, 123.8, 122.3, 112.6, 40.5, 23.3. HRMS (ESI): *m/z* calcd for C<sub>39</sub>H<sub>34</sub>ONNa [M+Na]<sup>+</sup>:590.2221, found:590.2227.

**methyl 2-(2,6-bis((*E*)-4-methyl-1-phenylpenta-1,4-dien-2-yl)phenyl)oxazole-5-carboxylate (3xa)**

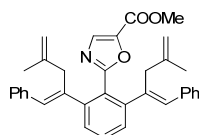

The general procedure was applied to **1x** (20.3 mg, 0.1 mmol), **2a** (39.0 mg, 2.5 equiv), Cp\*Rh(CH<sub>3</sub>CN)<sub>3</sub>(SbF<sub>6</sub>)<sub>2</sub> (5.9 mg, 7 mol%), PhOCH<sub>2</sub>COOH (22.8 mg, 1.5 equiv), MnO<sub>2</sub> (2.6 mg, 0.3 equiv) in toluene (1.0 mL) at 80 °C for 39 h under Ar. Purification by column chromatography on silica gel (petroleum ether/ethyl acetate = 20/1, v/v) afforded **3xa** as a white solid (17.5 mg, 34% yield). Melting point: 91.1–92.3°C; <sup>1</sup>H NMR (400 MHz, CDCl<sub>3</sub>): δ = 7.82 (s, 1H), 7.48 – 7.39 (m, 3H), 7.34 – 7.30 (m, 3H), 7.29 (s, 1H), 7.25 – 7.19 (m, 6H), 6.55 (s, 2H), 4.80 (d, *J* = 4.2 Hz, 4H), 3.87 (s, 3H), 3.03 (s, 4H), 1.66 (s, 6H). <sup>13</sup>C NMR (100 MHz, CDCl<sub>3</sub>): δ = 164.4, 158.3, 145.8, 142.6, 142.1, 139.0, 137.4, 134.9, 133.1, 130.0, 128.6, 128.3, 128.1, 127.0, 124.5, 112.8, 52.2, 40.6, 23.3. HRMS (ESI): *m/z* calcd for C<sub>35</sub>H<sub>34</sub>O<sub>3</sub>NNa [M+Na]<sup>+</sup>:538.2353, found:538.2359.

**2-(2,6-bis((*E*)-4-methyl-1-phenylpenta-1,4-dien-2-yl)phenyl)oxazole (3ya)**

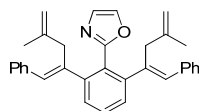

The general procedure was applied to **1y** (14.5 mg, 0.1 mmol), **2a** (39.0 mg, 2.5 equiv), Cp\*Rh(CH<sub>3</sub>CN)<sub>3</sub>(SbF<sub>6</sub>)<sub>2</sub> (5.9 mg, 7 mol%), PhOCH<sub>2</sub>COOH (22.8 mg, 1.5 equiv), MnO<sub>2</sub> (2.6 mg, 0.3 equiv) in toluene (1.0 mL) at 80 °C for 18 h under Ar. Purification by column chromatography on silica gel (petroleum ether/ethyl acetate = 20/1, v/v) afforded **3ya** as a white solid (32.8 mg, 72% yield). Melting point: 85.1–86.9°C; <sup>1</sup>H NMR (400 MHz, CDCl<sub>3</sub>): δ = 7.68 (s, 1H), 7.46 – 7.37 (m, 3H), 7.31 (t, *J* = 7.6 Hz, 4H), 7.25 – 7.19 (m, 7H), 6.56 (s, 2H), 4.80 (s, 4H), 2.98 (s, 4H), 1.66 (s, 6H). <sup>13</sup>C NMR (100 MHz, CDCl<sub>3</sub>): δ = 161.4, 145.8, 142.8, 139.4, 138.4, 137.7, 132.8, 129.4, 128.7, 128.2, 128.1, 128.0, 126.8, 125.5, 112.6, 40.4, 23.3. HRMS (ESI): *m/z* calcd for C<sub>33</sub>H<sub>32</sub>ON [M+H]<sup>+</sup>:458.2478, found:458.2481.

**2-(2,6-bis((*E*)-4-methyl-1-(*p*-tolyl)penta-1,4-dien-2-yl)phenyl)-5-methyloxazole (3ab)**

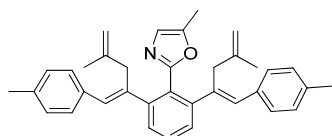

The general procedure was applied to **1a** (15.9 mg, 0.1 mmol), **2b** (42.5 mg, 2.5 equiv), Cp\*Rh(CH<sub>3</sub>CN)<sub>3</sub>(SbF<sub>6</sub>)<sub>2</sub> (5.9 mg, 7 mol%), PhOCH<sub>2</sub>COOH (22.8 mg, 1.5 equiv), MnO<sub>2</sub> (2.6 mg, 0.3 equiv) in toluene (1.0 mL) at 80 °C for 17 h under Ar. Purification by column chromatography on silica gel (petroleum ether/ethyl acetate = 20/1, v/v) afforded **3ab** as a colorless oil (33.1 mg, 66% yield). <sup>1</sup>H NMR (400 MHz, CDCl<sub>3</sub>): δ = 7.43 – 7.35 (m, 3H), 7.21 – 7.09 (m, 8H), 6.80 (s, 1H), 6.55 (s, 2H), 4.79 (s, 4H), 3.00 (s, 4H), 2.35 (s, 6H), 2.22 (s, 3H), 1.66 (s, 6H). <sup>13</sup>C NMR (100 MHz, CDCl<sub>3</sub>): δ = 159.9, 148.3, 145.7, 143.0, 138.9, 136.4, 134.9, 132.5, 129.1, 128.9, 128.6, 128.0, 125.8, 123.6, 112.4, 40.4, 23.3, 21.3, 11.0. HRMS (ESI): *m/z* calcd for C<sub>36</sub>H<sub>38</sub>ON [M+H]<sup>+</sup>: 500.2948, found: 500.2949.

**22-(2,6-bis((*E*)-1-(4-methoxyphenyl)-4-methylpenta-1,4-dien-2-yl)phenyl)-5-methyloxazole**

**(3ac)**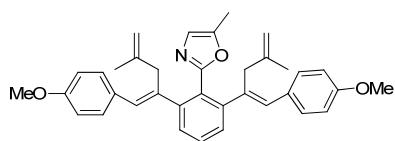

The general procedure was applied to **1a** (15.9 mg, 0.1 mmol), **2c** (46.5 mg, 2.5 equiv), Cp\*Rh(CH<sub>3</sub>CN)<sub>3</sub>(SbF<sub>6</sub>)<sub>2</sub> (5.9 mg, 7 mol%), PhOCH<sub>2</sub>COOH (22.8 mg, 1.5 equiv), MnO<sub>2</sub> (2.6 mg, 0.3 equiv) in toluene (1.0 mL) at 80 °C for 18 h under Ar. Purification by column chromatography on silica gel (petroleum ether/ethyl acetate = 20/1, v/v) afforded **3ac** as a colorless oil (32.9 mg, 62% yield). <sup>1</sup>H NMR (400 MHz, CDCl<sub>3</sub>): δ = 7.41 – 7.33 (m, 3H), 7.22 – 7.14 (m, 4H), 6.88 – 6.83 (m, 4H), 6.79 (d, *J* = 1.3 Hz, 1H), 6.51 (s, 2H), 4.79 (s, 4H), 3.81 (s, 6H), 2.97 (s, 4H), 2.26 (d, *J* = 1.2 Hz, 3H), 1.66 (s, 6H). <sup>13</sup>C NMR (100 MHz, CDCl<sub>3</sub>): δ = 159.9, 158.5, 148.3, 145.9, 143.0, 138.1, 132.2, 130.4, 129.9, 129.2, 128.0, 125.8, 123.6, 113.6, 112.3, 55.3, 40.4, 23.4, 11.0. HRMS (ESI): *m/z* calcd for C<sub>36</sub>H<sub>37</sub>O<sub>3</sub>NNa [M+Na]<sup>+</sup>: 554.2666, found: 554.2672.

**2-(2,6-bis((E)-1-(4-(tert-butyl)phenyl)-4-methylpenta-1,4-dien-2-yl)phenyl)-5-methyloxazole (3ad)**
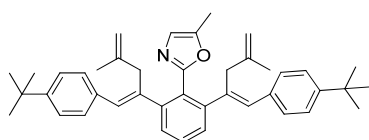

The general procedure was applied to **1a** (15.9 mg, 0.1 mmol), **2d** (53.0 mg, 2.5 equiv), Cp\*Rh(CH<sub>3</sub>CN)<sub>3</sub>(SbF<sub>6</sub>)<sub>2</sub> (5.9 mg, 7 mol%), PhOCH<sub>2</sub>COOH (22.8 mg, 1.5 equiv), MnO<sub>2</sub> (2.6 mg, 0.3 equiv) in toluene (1.0 mL) at 80 °C for 19 h under Ar. Purification by column chromatography on silica gel (petroleum ether/ethyl acetate = 20/1, v/v) afforded **3ad** as a white solid (40.9 mg, 70% yield). Melting point: 112.6–114.7°C. <sup>1</sup>H NMR (400 MHz, CDCl<sub>3</sub>): δ = 7.44 – 7.33 (m, 7H), 7.22 (d, *J* = 8.0 Hz, 4H), 6.80 (s, 1H), 6.57 (s, 2H), 4.82 (s, 4H), 3.02 (s, 4H), 2.30 (m, 3H), 1.70 (s, 6H), 1.35 (s, 18H). <sup>13</sup>C NMR (100 MHz, CDCl<sub>3</sub>): δ = 159.8, 149.6, 148.3, 145.8, 143.0, 138.9, 134.9, 132.5, 129.2, 128.4, 128.1, 125.7, 125.1, 123.6, 112.4, 40.5, 34.6, 31.5, 23.4, 11.1. HRMS (ESI): *m/z* calcd for C<sub>42</sub>H<sub>49</sub>ONNa [M+Na]<sup>+</sup>: 606.3706, found: 606.3710.

**2-(2,6-bis((E)-1-(4-fluorophenyl)-4-methylpenta-1,4-dien-2-yl)phenyl)-5-methyloxazole (3ae)**
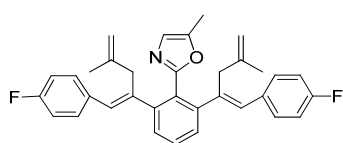

The general procedure was applied to **1a** (15.9 mg, 0.1 mmol), **2e** (43.5 mg, 2.5 equiv), Cp\*Rh(CH<sub>3</sub>CN)<sub>3</sub>(SbF<sub>6</sub>)<sub>2</sub> (5.9 mg, 7 mol%), PhOCH<sub>2</sub>COOH (22.8 mg, 1.5 equiv), MnO<sub>2</sub> (2.6 mg, 0.3 equiv) in toluene (1.0 mL) at 80 °C for 23 h under Ar. Purification by column chromatography on silica gel (petroleum ether/ethyl acetate = 20/1, v/v) afforded **3ae** as a colorless oil (31.4 mg, 62% yield). <sup>1</sup>H NMR (400 MHz, CDCl<sub>3</sub>): δ = 7.43 – 7.33 (m, 3H), 7.22 – 7.15 (m, 4H), 7.04 – 6.95 (m, 4H), 6.81 (d, *J* = 1.3 Hz, 1H), 6.51 (s, 2H), 4.76 (d, *J* = 8.7 Hz, 4H), 2.93 (s, 4H), 2.27 (d, *J* = 1.3 Hz, 3H), 1.63 (s, 6H). <sup>13</sup>C NMR (100 MHz, CDCl<sub>3</sub>): δ = 161.8 (d, *J* = 244.6 Hz), 159.8, 148.4, 145.5, 142.8, 139.6, 133.7 (d, *J* = 3.2 Hz), 131.5, 130.2 (d, *J* = 7.8 Hz), 129.3, 128.2, 125.7, 123.6, 115.2 (d, *J* = 21.2 Hz), 112.5, 40.3, 23.3, 11.0. <sup>19</sup>F NMR (376 MHz, CDCl<sub>3</sub>): δ = -115.49. HRMS (ESI): *m/z* calcd for C<sub>34</sub>H<sub>32</sub>F<sub>2</sub>ON [M+H]<sup>+</sup>: 508.2446, found: 508.2454.

**2-(2,6-bis((E)-1-(4-chlorophenyl)-4-methylpenta-1,4-dien-2-yl)phenyl)-5-methyloxazole (3af)**
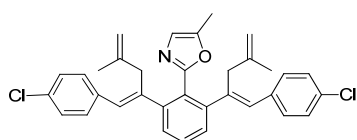

The general procedure was applied to **1a** (15.9 mg, 0.1 mmol), **2f** (47.5 mg, 2.5 equiv), Cp\*Rh(CH<sub>3</sub>CN)<sub>3</sub>(SbF<sub>6</sub>)<sub>2</sub> (5.9 mg, 7

mol%), PhOCH<sub>2</sub>COOH (22.8 mg, 1.5 equiv), MnO<sub>2</sub> (2.6 mg, 0.3 equiv) in toluene (1.0 mL) at 80 °C for 20 h under Ar. Purification by column chromatography on silica gel (petroleum ether/ethyl acetate = 20/1, v/v) afforded **3af** as a colorless oil (32.9 mg, 61% yield). <sup>1</sup>H NMR (400 MHz, CDCl<sub>3</sub>): δ = 7.57 (d, *J* = 8.0 Hz, 4H), 7.46 – 7.38 (m, 3H), 7.34 (d, *J* = 8.0 Hz, 4H), 6.83 (s, 1H), 6.58 (s, 2H), 4.78 (d, *J* = 13.8 Hz, 4H), 2.96 (s, 4H), 2.28 (s, 3H), 1.64 (s, 6H). <sup>13</sup>C NMR (100 MHz, CDCl<sub>3</sub>): δ = 159.6, 148.6, 145.2, 142.5, 141.6, 141.3, 131.4, 129.4, 129.0, 128.9, 128.3, 125.6, 125.3 (q, *J* = 3.7 Hz), 123.7, 112.8, 40.5, 23.3, 11.0. HRMS (ESI): *m/z* calcd for C<sub>34</sub>H<sub>31</sub>Cl<sub>2</sub>ONNa [M+Na]<sup>+</sup>: 562.1675, found: 562.1676.

### 2-(2,6-bis((*E*)-4-methyl-1-(*m*-tolyl)penta-1,4-dien-2-yl)phenyl)-5-methyloxazole (**3ag**)

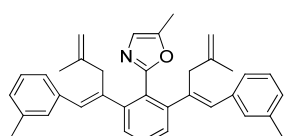

The general procedure was applied to **1a** (15.9 mg, 0.1 mmol), **2g** (42.5 mg, 2.5 equiv), Cp\*Rh(CH<sub>3</sub>CN)<sub>3</sub>(SbF<sub>6</sub>)<sub>2</sub> (5.9 mg, 7 mol%), PhOCH<sub>2</sub>COOH (22.8 mg, 1.5 equiv), MnO<sub>2</sub> (2.6 mg, 0.3 equiv) in toluene (1.0 mL) at 80 °C for 34 h under Ar. Purification by column chromatography on silica gel (petroleum ether/ethyl acetate = 20/1, v/v) afforded **3ag** as a colorless oil (31.5 mg, 63% yield). <sup>1</sup>H NMR (400 MHz, CDCl<sub>3</sub>): δ = 7.43 – 7.33 (m, 3H), 7.21 (t, *J* = 7.7 Hz, 2H), 7.10 – 7.02 (m, 6H), 6.81 (s, 1H), 6.55 (s, 2H), 4.76 (s, 4H), 2.98 (s, 4H), 2.34 (s, 6H), 2.29 (s, 3H), 1.64 (s, 6H). <sup>13</sup>C NMR (100 MHz, CDCl<sub>3</sub>): δ = 159.8, 148.3, 145.6, 143.0, 139.5, 137.8, 137.7, 132.7, 129.6, 129.1, 128.1, 127.5, 125.8, 125.7, 123.7, 112.5, 40.4, 23.2, 21.6, 11.0. HRMS (ESI): *m/z* calcd for C<sub>36</sub>H<sub>37</sub>ONNa [M+Na]<sup>+</sup>: 522.2767, found: 536.2777.

### 2-(2,6-bis((*E*)-1-(3-methoxyphenyl)-4-methylpenta-1,4-dien-2-yl)phenyl)-5-methyloxazole (**3ah**)

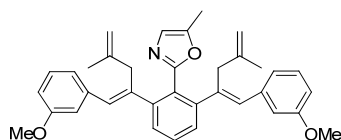

The general procedure was applied to **1a** (15.9 mg, 0.1 mmol), **2h** (46.5 mg, 2.5 equiv), Cp\*Rh(CH<sub>3</sub>CN)<sub>3</sub>(SbF<sub>6</sub>)<sub>2</sub> (5.9 mg, 7 mol%), PhOCH<sub>2</sub>COOH (22.8 mg, 1.5 equiv), MnO<sub>2</sub> (2.6 mg, 0.3 equiv) in toluene (1.0 mL) at 80 °C for 24 h under Ar. Purification by column chromatography on silica gel (petroleum ether/ethyl acetate = 20/1, v/v) afforded **3ah** as a colorless oil (31.3 mg, 59% yield). <sup>1</sup>H NMR (400 MHz, CDCl<sub>3</sub>): δ = 7.44 – 7.33 (m, 3H), 7.22 (t, *J* = 7.9 Hz, 2H), 6.85 – 6.76 (m, 7H), 6.55 (s, 2H), 4.78 (s, 4H), 3.79 (s, 6H), 2.98 (s, 4H), 2.28 (s, 3H), 1.65 (s, 6H). <sup>13</sup>C NMR (100 MHz, CDCl<sub>3</sub>): δ = 159.8, 159.5, 148.4, 145.5, 143.0, 139.8, 139.2, 132.5, 129.2, 129.2, 128.1, 125.8, 123.6, 121.2, 113.9, 112.6, 112.5, 55.2, 40.5, 23.3, 11.0. HRMS (ESI): *m/z* calcd for C<sub>36</sub>H<sub>37</sub>O<sub>3</sub>NNa [M+Na]<sup>+</sup>: 554.2666, found: 554.2672.

### 2-(2,6-bis((*E*)-1-(3-chlorophenyl)-4-methylpenta-1,4-dien-2-yl)phenyl)-5-methyloxazole (**3ai**)

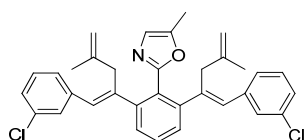

The general procedure was applied to **1a** (15.9 mg, 0.1 mmol), **2i** (47.5 mg, 2.5 equiv), Cp\*Rh(CH<sub>3</sub>CN)<sub>3</sub>(SbF<sub>6</sub>)<sub>2</sub> (5.9 mg, 7 mol%), PhOCH<sub>2</sub>COOH (22.8 mg, 1.5 equiv), MnO<sub>2</sub> (2.6 mg, 0.3 equiv) in toluene (1.0 mL) at 80 °C for 24 h under Ar. Purification by column chromatography on silica gel (petroleum ether/ethyl acetate = 20/1, v/v) afforded **3ai** as a colorless oil (29.7 mg, 55% yield). <sup>1</sup>H NMR (400 MHz, CDCl<sub>3</sub>): δ = 7.45 – 7.33 (m, 3H), 7.25 – 7.17 (m, 6H), 7.11 (d, *J* = 7.3 Hz, 2H), 6.83 (s, 1H), 6.50 (s, 2H), 4.76 (d, *J* = 16.7 Hz, 4H), 2.94 (s, 4H), 2.30 (s, 3H), 1.63 (s, 6H). <sup>13</sup>C NMR (100 MHz, CDCl<sub>3</sub>): δ = 159.6, 148.6, 145.2, 142.6, 141.0,

139.5, 134.1, 131.2, 129.5, 129.3, 128.7, 128.2, 126.9, 126.8, 125.7, 123.8, 112.8, 40.4, 23.2, 11.0. HRMS (ESI):  $m/z$  calcd for  $C_{34}H_{31}ONCl_2Na [M+Na]^+$ : 562.1675, found: 562.1681.

### 2-(2,6-bis(*E*)-4-methyl-1-(*o*-tolyl)penta-1,4-dien-2-yl)phenyl)-5-methyloxazole (3aj)

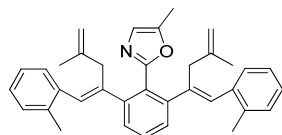

The general procedure was applied to **1a** (15.9 mg, 0.1 mmol), **2j** (42.5 mg, 2.5 equiv),  $Cp^*Rh(CH_3CN)_3(SbF_6)_2$  (5.9 mg, 7 mol%),  $PhOCH_2COOH$  (22.8 mg, 1.5 equiv),  $MnO_2$  (2.6 mg, 0.3 equiv) in toluene (1.0 mL) at 80 °C for 60 h under Ar. Purification by column chromatography on silica gel (petroleum ether/ethyl acetate = 20/1, v/v) afforded **3aj** as a colorless oil (13.5 mg, 27% yield).  $^1H$  NMR (400 MHz,  $CDCl_3$ ):  $\delta$  = 7.44 – 7.39 (m, 1H), 7.35 (s, 1H), 7.34 (d,  $J$  = 1.5 Hz, 1H), 7.18 – 7.13 (m, 8H), 6.85 (d,  $J$  = 1.3 Hz, 1H), 6.54 (s, 2H), 4.64 (s, 2H), 4.60 (s, 2H), 2.82 (s, 4H), 2.33 (d,  $J$  = 0.8 Hz, 3H), 2.23 (s, 6H), 1.53 (s, 6H).  $^{13}C$  NMR (100 MHz,  $CDCl_3$ ):  $\delta$  = 159.8, 148.5, 144.8, 143.0, 140.5, 137.2, 136.7, 131.4, 129.8, 129.1, 128.9, 128.4, 127.1, 126.0, 125.5, 123.8, 112.8, 40.2, 22.9, 20.1, 11.1. HRMS (ESI):  $m/z$  calcd for  $C_{36}H_{37}ONNa [M+Na]^+$ : 522.2767, found: 522.2769.

### 2-(2,6-bis(*E*)-4-methyl-1-(thiophen-2-yl)penta-1,4-dien-2-yl)phenyl)-5-methyloxazole (3ak)

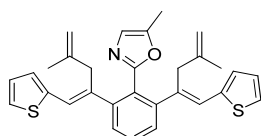

The general procedure was applied to **1a** (15.9 mg, 0.1 mmol), **2k** (40.5 mg, 2.5 equiv),  $Cp^*Rh(CH_3CN)_3(SbF_6)_2$  (5.9 mg, 7 mol%),  $PhOCH_2COOH$  (22.8 mg, 1.5 equiv),  $MnO_2$  (2.6 mg, 0.3 equiv) in toluene (1.0 mL) at 80 °C for 42 h under Ar. Purification by column chromatography on silica gel (petroleum ether/ethyl acetate = 20/1, v/v) afforded **3ak** as a colorless oil (16.9 mg, 35% yield).  $^1H$  NMR (400 MHz,  $CDCl_3$ ):  $\delta$  = 7.41 – 7.32 (m, 3H), 7.23 (dd,  $J$  = 5.0, 1.3 Hz, 2H), 7.00 – 6.94 (m, 4H), 6.75 (s, 1H), 6.68 (s, 2H), 4.76 (s, 4H), 3.11 (s, 4H), 2.24 (s, 3H), 1.72 (s, 6H).  $^{13}C$  NMR (100 MHz,  $CDCl_3$ ):  $\delta$  = 159.5, 148.7, 145.7, 141.7, 140.3, 137.8, 129.5, 128.2, 127.8, 126.9, 125.4, 125.3, 123.7, 111.9, 41.3, 23.4, 11.0. HRMS (ESI):  $m/z$  calcd for  $C_{30}H_{29}ONS_2Na [M+Na]^+$ : 506.1583, found: 506.1588.

### 2-(2,6-bis(*E*)-1-phenylprop-1-en-2-yl)phenyl)-5-methyloxazole (3al)

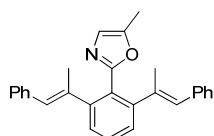

The general procedure was applied to **1a** (15.9 mg, 0.1 mmol), **2l** (29.0 mg, 2.5 equiv),  $Cp^*Rh(CH_3CN)_3(SbF_6)_2$  (5.9 mg, 7 mol%),  $PhOCH_2COOH$  (22.8 mg, 1.5 equiv),  $MnO_2$  (2.6 mg, 0.3 equiv) in toluene (1.0 mL) at 80 °C for 13 h under Ar. Purification by column chromatography on silica gel (petroleum ether/ethyl acetate = 20/1, v/v) afforded **3al** as a white solid (28.2 mg, 72% yield). Melting point: 104.6–105.5 °C.  $^1H$  NMR (400 MHz,  $CDCl_3$ ):  $\delta$  = 7.44 – 7.38 (m, 1H), 7.32 – 7.27 (m, 5H), 7.21 – 7.13 (m, 7H), 6.74 (d,  $J$  = 1.3 Hz, 1H), 6.33 (s, 2H), 2.23 (d,  $J$  = 1.2 Hz, 3H), 1.97 (d,  $J$  = 1.5 Hz, 6H).  $^{13}C$  NMR (100 MHz,  $CDCl_3$ ):  $\delta$  = 159.8, 148.5, 147.2, 138.2, 138.1, 129.8, 129.7, 129.0, 128.2, 127.2, 126.5, 125.6, 123.6, 19.8, 11.0. HRMS (ESI):  $m/z$  calcd for  $C_{28}H_{25}ONNa [M+Na]^+$ : 414.1828, found: 414.1837.

### 2-(2,6-bis(*E*)-1-phenylhex-1-en-2-yl)phenyl)-5-methyloxazole (3am)

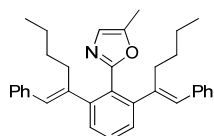

The general procedure was applied to **1a** (15.9 mg, 0.1 mmol), **2m** (39.5 mg, 2.5 equiv),  $Cp^*Rh(CH_3CN)_3(SbF_6)_2$  (5.9 mg, 7 mol%),  $PhOCH_2COOH$  (22.8 mg, 1.5 equiv),  $MnO_2$  (2.6 mg, 0.3 equiv) in toluene (1.0 mL) at 80 °C for 17

h under Ar. Purification by column chromatography on silica gel (petroleum ether/ethyl acetate = 20/1, v/v) afforded **3am** as a colorless oil (30.4 mg, 64% yield). <sup>1</sup>H NMR (400 MHz, CDCl<sub>3</sub>): δ = 7.47 (t, *J* = 8.4 Hz, 1H), 7.39 – 7.30 (m, 6H), 7.26 – 7.20 (m, 6H), 6.81 (s, 1H), 6.43 (s, 2H), 2.38 – 2.32 (m, 4H), 2.31 (s, 3H), 1.42 – 1.32 (m, 4H), 1.31 – 1.20 (m, 4H), 0.83 (t, *J* = 7.2 Hz, 6H). <sup>13</sup>C NMR (100 MHz, CDCl<sub>3</sub>): δ = 159.7, 148.2, 145.7, 143.2, 138.3, 130.1, 129.3, 128.8, 128.2, 127.7, 126.5, 126.5, 123.5, 31.8, 30.5, 22.9, 14.0, 11.0. HRMS (ESI): *m/z* calcd for C<sub>34</sub>H<sub>37</sub>ONNa [M+Na]<sup>+</sup>: 498.2767, found: 498.2764.

### 2-(2,6-bis((*E*)-1-phenylhex-1-en-2-yl)phenyl)-5-methyloxazole (**3an**)

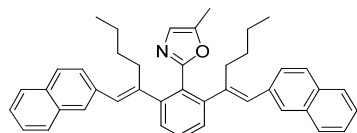

The general procedure was applied to **1a** (15.9 mg, 0.1 mmol), **2n** (52.0 mg, 2.5 equiv), Cp\*Rh(CH<sub>3</sub>CN)<sub>3</sub>(SbF<sub>6</sub>)<sub>2</sub> (5.9 mg, 7 mol%), PhOCH<sub>2</sub>COOH (22.8 mg, 1.5 equiv), MnO<sub>2</sub> (2.6 mg, 0.3 equiv) in toluene (1.0 mL) at 80 °C for 19 h under Ar.

Purification by column chromatography on silica gel (petroleum ether/ethyl acetate = 20/1, v/v) afforded **3an** as a colorless oil (39.1 mg, 68% yield). <sup>1</sup>H NMR (400 MHz, CDCl<sub>3</sub>): δ = 7.84 – 7.78 (m, 6H), 7.67 (s, 2H), 7.54 – 7.39 (m, 7H), 7.35 (dd, *J* = 8.5, 1.7 Hz, 2H), 6.82 (d, *J* = 1.3 Hz, 1H), 6.57 (s, 2H), 2.41 (d, *J* = 8 Hz, 4H), 2.31 (d, *J* = 1.2 Hz, 3H), 1.46 – 1.36 (m, 4H), 1.30 – 1.22 (m, 4H), 0.83 (t, *J* = 7.3 Hz, 6H). <sup>13</sup>C NMR (100 MHz, CDCl<sub>3</sub>): δ = 159.8, 148.3, 145.8, 143.6, 135.8, 133.5, 132.3, 130.2, 129.4, 128.0, 127.7, 127.6, 127.5, 127.4, 126.6, 126.1, 125.7, 123.6, 31.9, 30.6, 22.9, 14.0, 11.1. HRMS (ESI): *m/z* calcd for C<sub>42</sub>H<sub>41</sub>ONNa [M+Na]<sup>+</sup>: 598.3080, found: 598.3085.

### 2-(2,6-bis((*E*)-1,5-diphenylpent-1-en-2-yl)phenyl)-5-methyloxazole (**3ao**)

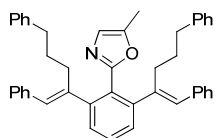

The general procedure was applied to **1a** (15.9 mg, 0.1 mmol), **2o** (55.0 mg, 2.5 equiv), Cp\*Rh(CH<sub>3</sub>CN)<sub>3</sub>(SbF<sub>6</sub>)<sub>2</sub> (5.9 mg, 7 mol%), PhOCH<sub>2</sub>COOH (22.8 mg, 1.5 equiv), MnO<sub>2</sub> (2.6 mg, 0.3 equiv) in toluene (1.0 mL) at 80 °C for 21 h under Ar. Purification by column chromatography on silica gel (petroleum ether/ethyl acetate = 20/1, v/v) afforded **3ao** as a white solid (36.0 mg, 60% yield). Melting point:

57.9–59.8°C. <sup>1</sup>H NMR (400 MHz, CDCl<sub>3</sub>): δ = 7.41 – 7.34 (m, 1H), 7.25 – 7.17 (m, 5H), 7.17 – 7.03 (m, 13H), 7.01 – 6.96 (m, 4H), 6.71 (s, 1H), 6.34 (s, 2H), 2.45 (t, *J* = 7.6 Hz, 4H), 2.33 (t, *J* = 7.6 Hz, 4H), 2.18 (s, 3H), 1.69 – 1.57 (m, 4H). <sup>13</sup>C NMR (100 MHz, CDCl<sub>3</sub>): δ = 159.6, 148.3, 145.5, 142.5, 142.3, 138.0, 130.6, 129.5, 128.8, 128.5, 128.3, 128.2, 127.8, 126.5, 125.7, 123.5, 35.8, 31.5, 30.0, 11.0. HRMS (ESI): *m/z* calcd for C<sub>44</sub>H<sub>41</sub>ONNa [M+Na]<sup>+</sup>: 622.3080, found: 622.3083.

### 2-(2,6-bis((*E*)-1,5,5-triphenylpent-1-en-2-yl)phenyl)-5-methyloxazole (**3ap**)

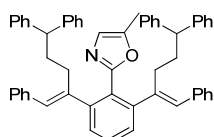

The general procedure was applied to **1a** (15.9 mg, 0.1 mmol), **2p** (74.0 mg, 2.5 equiv), Cp\*Rh(CH<sub>3</sub>CN)<sub>3</sub>(SbF<sub>6</sub>)<sub>2</sub> (5.9 mg, 7 mol%), PhOCH<sub>2</sub>COOH (22.8 mg, 1.5 equiv), MnO<sub>2</sub> (2.6 mg, 0.3 equiv) in toluene (1.0 mL) at 80 °C for 20 h under Ar. Purification by column chromatography on silica gel (petroleum ether/ethyl acetate = 20/1, v/v) afforded **3ap** as a white solid (52.6 mg, 70% yield). Melting point:

130.4–131.9°C. <sup>1</sup>H NMR (400 MHz, CDCl<sub>3</sub>): δ = δ 7.43 – 7.35 (m, 1H), 7.24 (s, 1H), 7.21 – 7.11 (m, 15H), 7.10 – 7.03 (m, 12H), 7.00 (d, *J* = 6.7 Hz, 4H), 6.67 (s, 1H), 6.35 (s, 2H), 3.77 (t, *J* = 7.6 Hz, 2H), 2.38 – 2.27 (m, 4H), 2.19 – 2.04 (m, 7H). <sup>13</sup>C NMR (100 MHz, CDCl<sub>3</sub>): δ = 159.4,

148.1, 145.5, 144.8, 142.2, 137.9, 130.7, 129.4, 128.6, 128.4, 128.2, 127.9, 127.8, 126.6, 126.5, 126.1, 123.5, 51.2, 34.2, 30.6, 11.0. HRMS (ESI):  $m/z$  calcd for  $C_{56}H_{49}ONNa$   $[M+Na]^+$ : 774.3706, found: 774.3712.

### 2-(2,6-bis((*E*)-4-methoxy-1-phenylbut-1-en-2-yl)phenyl)-5-methyloxazole (3aq)

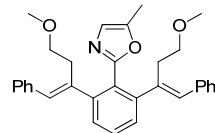

The general procedure was applied to **1a** (15.9 mg, 0.1 mmol), **2q** (40.0 mg, 2.5 equiv),  $Cp^*Rh(CH_3CN)_3(SbF_6)_2$  (5.9 mg, 7 mol%),  $PhOCH_2COOH$  (22.8 mg, 1.5 equiv),  $MnO_2$  (2.6 mg, 0.3 equiv) in toluene (1.0 mL) at 100 °C for 20 h under Ar. Purification by column chromatography on silica gel (petroleum ether/ethyl acetate = 5/1, v/v) afforded **3aq** as a colorless oil (29.7 mg, 62% yield).  $^1H$  NMR (400 MHz,  $CDCl_3$ ):  $\delta$  = 7.51 – 7.45 (m, 1H), 7.39 – 7.28 (m, 6H), 7.25 – 7.18 (m, 6H), 6.78 (s, 1H), 6.46 (s, 2H), 3.37 (t,  $J$  = 7.2 Hz, 4H), 3.23 (s, 6H), 2.66 (t,  $J$  = 7.3 Hz, 4H), 2.28 (d,  $J$  = 1.2 Hz, 3H).  $^{13}C$  NMR (100 MHz,  $CDCl_3$ ):  $\delta$  = 159.4, 148.5, 145.0, 138.9, 137.7, 132.1, 129.5, 128.8, 128.3, 127.9, 126.8, 126.6, 123.6, 70.8, 58.6, 32.5, 11.1. HRMS (ESI):  $m/z$  calcd for  $C_{32}H_{33}O_3NNa$   $[M+Na]^+$ : 502.2353, found: 502.2357.

### 2-(2,6-bis((*E*)-1-phenyl-4-(3-phenylpropoxy)but-1-en-2-yl)phenyl)-5-methyloxazole (3ar)

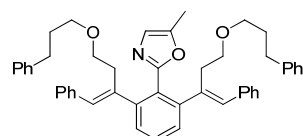

The general procedure was applied to **1a** (15.9 mg, 0.1 mmol), **2r** (66.0 mg, 2.5 equiv),  $Cp^*Rh(CH_3CN)_3(SbF_6)_2$  (5.9 mg, 7 mol%),  $PhOCH_2COOH$  (22.8 mg, 1.5 equiv),  $MnO_2$  (2.6 mg, 0.3 equiv) in toluene (1.0 mL) at 80 °C for 36 h under Ar. Purification by column chromatography on silica gel (petroleum ether/ethyl acetate = 5/1, v/v) afforded **3ar** as a colorless oil (37.1 mg, 54% yield).  $^1H$  NMR (400 MHz,  $CDCl_3$ ):  $\delta$  = 7.37 – 7.31 (m, 1H), 7.25 – 7.19 (m, 5H), 7.18 – 7.09 (m, 11H), 7.09 – 7.01 (m, 6H), 6.66 (s, 1H), 6.35 (s, 2H), 3.29 (t,  $J$  = 7.2 Hz, 4H), 3.19 (t,  $J$  = 6.4 Hz, 4H), 2.58 – 2.48 (m, 8H), 2.16 (s, 3H), 1.75 – 1.65 (m, 4H).  $^{13}C$  NMR (100 MHz,  $CDCl_3$ ):  $\delta$  = 159.5, 148.5, 145.1, 142.2, 139.2, 137.8, 132.0, 129.5, 128.9, 128.6, 128.4, 128.3, 128.0, 126.8, 126.5, 125.8, 123.6, 70.0, 68.9, 32.6, 32.5, 31.5, 11.1. HRMS (ESI):  $m/z$  calcd for  $C_{48}H_{49}O_3NNa$   $[M+Na]^+$ : 710.3605, found: 710.3609.

### 2-(2,6-bis((*E*)-5-(methoxymethoxy)-1-phenylpent-1-en-2-yl)phenyl)-5-methyloxazole (3as)

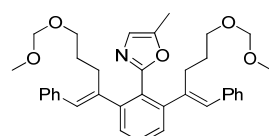

The general procedure was applied to **1a** (15.9 mg, 0.1 mmol), **2s** (51.0 mg, 2.5 equiv),  $Cp^*Rh(CH_3CN)_3(SbF_6)_2$  (5.9 mg, 7 mol%),  $PhOCH_2COOH$  (22.8 mg, 1.5 equiv),  $MnO_2$  (2.6 mg, 0.3 equiv) in toluene (1.0 mL) at 80 °C for 17 h under Ar. Purification by column chromatography on silica gel (petroleum ether/ethyl acetate = 5/1, v/v) afforded **3as** as a colorless oil (36.3 mg, 64% yield).  $^1H$  NMR (400 MHz,  $CDCl_3$ ):  $\delta$  = 7.49 – 7.43 (m, 1H), 7.38 – 7.28 (m, 6H), 7.24 – 7.15 (m, 6H), 6.78 (s, 1H), 6.40 (s, 2H), 4.48 (s, 4H), 3.41 (t,  $J$  = 6.5 Hz, 4H), 3.26 (s, 6H), 2.41 (t,  $J$  = 8 Hz, 4H), 2.28 (s, 3H), 1.71 – 1.58 (m, 4H).  $^{13}C$  NMR (100 MHz,  $CDCl_3$ ):  $\delta$  = 159.6, 148.4, 145.4, 141.9, 137.9, 130.9, 129.5, 128.8, 128.2, 127.7, 126.7, 126.6, 123.5, 96.4, 67.6, 55.2, 28.6, 28.4, 11.0. HRMS (ESI):  $m/z$  calcd for  $C_{36}H_{41}O_5NNa$   $[M+Na]^+$ : 590.2877, found: 590.2881.

### 2-(2,6-bis((*E*)-4-(1,3-dioxan-2-yl)-1-phenylbut-1-en-2-yl)phenyl)-5-methyloxazole (3at)

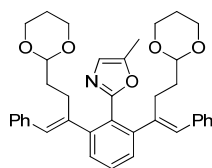

The general procedure was applied to **1a** (15.9 mg, 0.1 mmol), **2t** (54.0 mg, 2.5 equiv), Cp\*Rh(CH<sub>3</sub>CN)<sub>3</sub>(SbF<sub>6</sub>)<sub>2</sub> (5.9 mg, 7 mol%), PhOCH<sub>2</sub>COOH (22.8 mg, 1.5 equiv), MnO<sub>2</sub> (2.6 mg, 0.3 equiv) in toluene (1.0 mL) at 80 °C for 19 h under Ar. Purification by column chromatography on silica gel (petroleum ether/ethyl acetate = 4/1, v/v) afforded **3at** as a white solid (39.0 mg, 66% yield). Melting point: 93.4–95.1 °C. <sup>1</sup>H NMR (400 MHz, CDCl<sub>3</sub>): δ = 7.43 (t, *J* = 7.7 Hz, 1H), 7.35 – 7.27 (m, 6H), 7.23 – 7.15 (m, 6H), 6.74 (s, 1H), 6.35 (s, 2H), 4.40 (t, *J* = 5.2 Hz, 2H), 4.00 (dd, *J* = 11.5, 4.8 Hz, 4H), 3.62 (t, *J* = 11.3 Hz, 4H), 2.50 (t, *J* = 7.6 Hz, 4H), 2.26 (s, 3H), 2.07 – 1.94 (m, 2H), 1.77 – 1.63 (m, 4H), 1.26 (d, *J* = 12.9 Hz, 2H). <sup>13</sup>C NMR (100 MHz, CDCl<sub>3</sub>): δ = 159.5, 148.2, 145.3, 141.5, 137.9, 130.9, 129.4, 128.8, 128.2, 127.6, 126.9, 126.5, 123.4, 102.0, 66.9, 33.7, 26.5, 25.9, 11.1. HRMS (ESI): *m/z* calcd for C<sub>38</sub>H<sub>42</sub>O<sub>5</sub>N [M+H]<sup>+</sup>: 592.3057, found: 592.3067.

### di-tert-butyl

#### 4,4'-((1*E*,1'*E*)-(2-(5-methyloxazol-2-yl)-1,3-phenylene)bis(2-phenylethene-1,1-diyl))bis(piperidine-1-carboxylate) (**3au**)

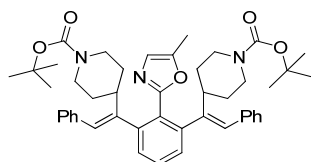

The general procedure was applied to **1a** (15.9 mg, 0.1 mmol), **2u** (71.3 mg, 2.5 equiv), Cp\*Rh(CH<sub>3</sub>CN)<sub>3</sub>(SbF<sub>6</sub>)<sub>2</sub> (5.9 mg, 7 mol%), PhOCH<sub>2</sub>COOH (22.8 mg, 1.5 equiv), MnO<sub>2</sub> (2.6 mg, 0.3 equiv) in toluene (1.0 mL) at 100 °C for 26 h under Ar. Purification by column chromatography on silica gel (petroleum ether/ethyl acetate = 4/1, v/v) afforded **3au** as a white solid (40.8 mg, 56% yield). Melting point: 156.7–157.9 °C. <sup>1</sup>H NMR (400 MHz, CDCl<sub>3</sub>): δ = 7.44 – 7.39 (m, 1H), 7.35 – 7.29 (m, 4H), 7.27 (s, 1H), 7.26 – 7.20 (m, 3H), 7.10 (d, *J* = 7.5 Hz, 4H), 6.78 (d, *J* = 1.4 Hz, 1H), 6.42 (s, 2H), 4.21 – 3.92 (m, 4H), 2.82 (tt, *J* = 12.1, 3.2 Hz, 2H), 2.56 (t, *J* = 12.8 Hz, 4H), 2.29 (d, *J* = 1.3 Hz, 3H), 1.61 (d, *J* = 12.7 Hz, 4H), 1.40 (s, 22H). <sup>13</sup>C NMR (100 MHz, CDCl<sub>3</sub>): δ = 159.8, 154.9, 148.1, 144.1, 143.7, 137.5, 132.1, 128.9, 128.6, 128.3, 128.1, 128.1, 126.8, 123.1, 79.4, 43.9, 39.2, 31.0, 28.6, 11.0. HRMS (ESI): *m/z* calcd for C<sub>46</sub>H<sub>55</sub>O<sub>5</sub>N<sub>3</sub>Na [M+Na]<sup>+</sup>: 752.4034, found: 752.4040.

#### 2-(2,6-bis((*E*)-1,2-diphenylvinyl)phenyl)-5-methyloxazole (**3av**)

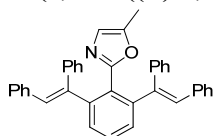

The general procedure was applied to **1a** (15.9 mg, 0.1 mmol), **2v** (44.5 mg, 2.5 equiv), Cp\*Rh(CH<sub>3</sub>CN)<sub>3</sub>(SbF<sub>6</sub>)<sub>2</sub> (5.9 mg, 7 mol%), PhOCH<sub>2</sub>COOH (22.8 mg, 1.5 equiv), MnO<sub>2</sub> (2.6 mg, 0.3 equiv) in toluene (1.0 mL) at 80 °C for 30 h under Ar. Purification by column chromatography on silica gel (petroleum ether/ethyl acetate = 8/1, v/v) afforded **3av** as a colorless oil (15.4 mg, 30% yield). <sup>1</sup>H NMR (400 MHz, CDCl<sub>3</sub>): δ = 7.51 – 7.40 (m, 3H), 7.17 – 7.06 (m, 12H), 7.04 – 6.95 (m, 8H), 6.65 (s, 2H), 6.32 (s, 1H), 1.84 (s, 3H). <sup>13</sup>C NMR (100 MHz, CDCl<sub>3</sub>): δ = 159.0, 147.9, 146.4, 141.8, 139.9, 137.5, 130.7, 130.1, 129.6, 129.4, 128.0, 127.9, 126.8, 126.8, 123.0, 10.5. HRMS (ESI): *m/z* calcd for C<sub>38</sub>H<sub>30</sub>ON [M+H]<sup>+</sup>: 516.2322, found: 516.2324.

#### (4*E*,4'*E*)-4,4'-(2-(5-methyloxazol-2-yl)-1,3-phenylene)bis(5-phenylpent-4-en-1-ol) (**4**)

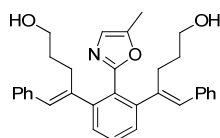

<sup>1</sup>H NMR (400 MHz, CDCl<sub>3</sub>): δ = 7.49 (t, *J* = 7.7 Hz, 1H), 7.38 – 7.28 (m, 6H), 7.25 – 7.19 (m, 2H), 7.16 (d, *J* = 7.5 Hz, 4H), 6.81 (s, 1H), 6.38 (s, 2H), 3.46 (t, *J* = 6.3 Hz, 4H), 2.45 (t, *J* = 7.5 Hz, 4H), 2.31 (s, 3H), 1.67 – 1.54 (m,



4H).  $^{13}\text{C}$  NMR (100 MHz,  $\text{CDCl}_3$ ):  $\delta = 160.1, 148.9, 145.5, 141.8, 137.8, 131.0, 129.9, 128.8, 128.3, 127.7, 126.8, 126.5, 123.0, 62.3, 31.3, 28.1, 11.1$ . HRMS (ESI):  $m/z$  calcd for  $\text{C}_{32}\text{H}_{34}\text{O}_3\text{N}$   $[\text{M}+\text{H}]^+$ : 480.2533, found: 480.2530.

**2-(2,6-bis((E)-4,5-dibromo-4-methyl-1-phenylpenta-1-en-2-yl)phenyl)-5-methyloxazole (5)**

Melting point: 126.1–127.8 °C.  $^1\text{H}$  NMR (400 MHz,  $\text{CDCl}_3$ ):  $\delta = 7.54$  (s, 3H), 7.35 (t,  $J = 7.5$  Hz, 4H), 7.25 – 7.19 (m, 6H), 6.96 (s, 1H), 6.71 (s, 2H), 3.68 – 3.58 (m, 4H), 3.15 – 2.96 (m, 4H), 2.41 (s, 3H), 1.56 (d,  $J = 2.8$  Hz, 6H).  $^{13}\text{C}$  NMR (100 MHz,  $\text{CDCl}_3$ ):  $\delta = 159.2, 149.0, 149.0, 145.2, 137.5, 137.4, 136.6, 130.0, 130.0, 129.0, 129.0, 128.9, 128.5, 127.1, 125.9, 123.8, 123.8, 66.6, 66.5, 45.1, 42.4, 30.6, 30.6, 11.3$ .

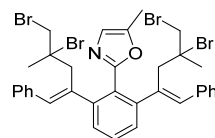

**(E)-5-methyl-2-(2-(4-methyl-1-phenylpenta-1,4-dien-2-yl)-5-(phenylethynyl)phenyl)oxazole (6)**

$^1\text{H}$  NMR (400 MHz,  $\text{CDCl}_3$ ):  $\delta = 7.99$  (s, 1H), 7.51 – 7.38 (m, 3H), 7.32 – 7.21 (m, 8H), 7.20 – 7.13 (m, 1H), 6.76 (s, 1H), 6.53 (s, 1H), 4.56 (d,  $J = 25.5$  Hz, 2H), 3.07 (s, 2H), 2.25 (s, 3H), 1.49 (s, 3H).  $^{13}\text{C}$  NMR (100 MHz,  $\text{CDCl}_3$ ):  $\delta = 160.3, 149.2, 143.2, 142.8, 140.5, 137.8, 132.6, 132.3, 131.8, 130.9, 128.8, 128.5, 128.4, 126.9, 126.5, 124.4, 123.3, 122.4, 112.6, 90.3, 88.7, 40.5, 23.2, 11.2$ .

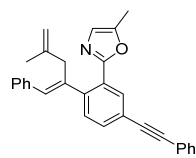

**2-(2,6-bis((E)-4-methyl-1-phenylpenta-1,4-dien-2-yl)phenyl)oxazole-5-carboxylic acid (7)**

Melting point: 124.1–125.8 °C.  $^1\text{H}$  NMR (400 MHz,  $\text{CDCl}_3$ ):  $\delta = 7.88$  (s, 1H), 7.47 – 7.33 (m, 3H), 7.25 – 7.12 (m, 9H), 6.51 (s, 2H), 4.75 (d,  $J = 6.2$  Hz, 4H), 2.99 (s, 4H), 1.62 (s, 6H).  $^{13}\text{C}$  NMR (100 MHz,  $\text{CDCl}_3$ ):  $\delta = 165.3, 161.6, 145.9, 142.6, 141.7, 138.8, 137.3, 136.3, 133.3, 130.2, 128.6, 128.3, 128.2, 127.0, 124.2, 112.9, 40.7, 23.3$ .

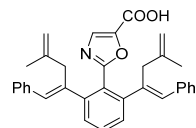

**3,5-bis((E)-4-methyl-1-phenylpenta-1,4-dien-2-yl)-4-(5-methyloxazol-2-yl)-N-(prop-2-yn-1-yl)benzamide (8)**

$^1\text{H}$  NMR (400 MHz,  $\text{CDCl}_3$ ):  $\delta = 7.73$  (s, 2H), 7.36 – 7.29 (m, 4H), 7.28 – 7.21 (m, 6H), 6.84 (s, 1H), 6.60 (s, 2H), 6.30 (s, 1H), 4.74 (d,  $J = 13.1$  Hz, 4H), 4.30 (s, 2H), 2.96 (s, 4H), 2.32 (s, 1H), 2.29 (s, 3H), 1.61 (s, 6H).  $^{13}\text{C}$  NMR (100 MHz,  $\text{CDCl}_3$ ):  $\delta = 166.7, 158.8, 148.9, 146.1, 142.6, 139.0, 137.5, 134.3, 133.3, 128.7, 128.3, 127.0, 126.7, 123.9, 112.9, 79.5, 72.2, 40.2, 30.1, 23.2, 11.1$ .

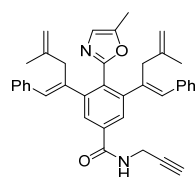

**10.  $^1\text{H}$ ,  $^{13}\text{C}$  and  $^{19}\text{F}$  NMR spectra**

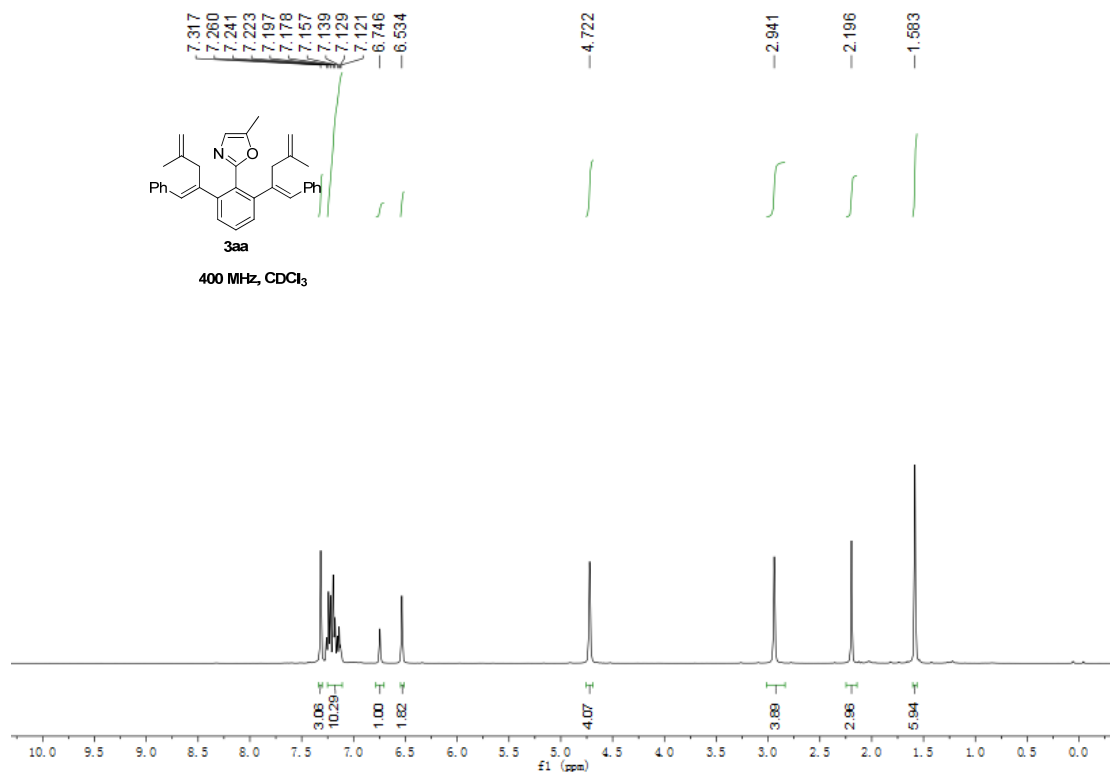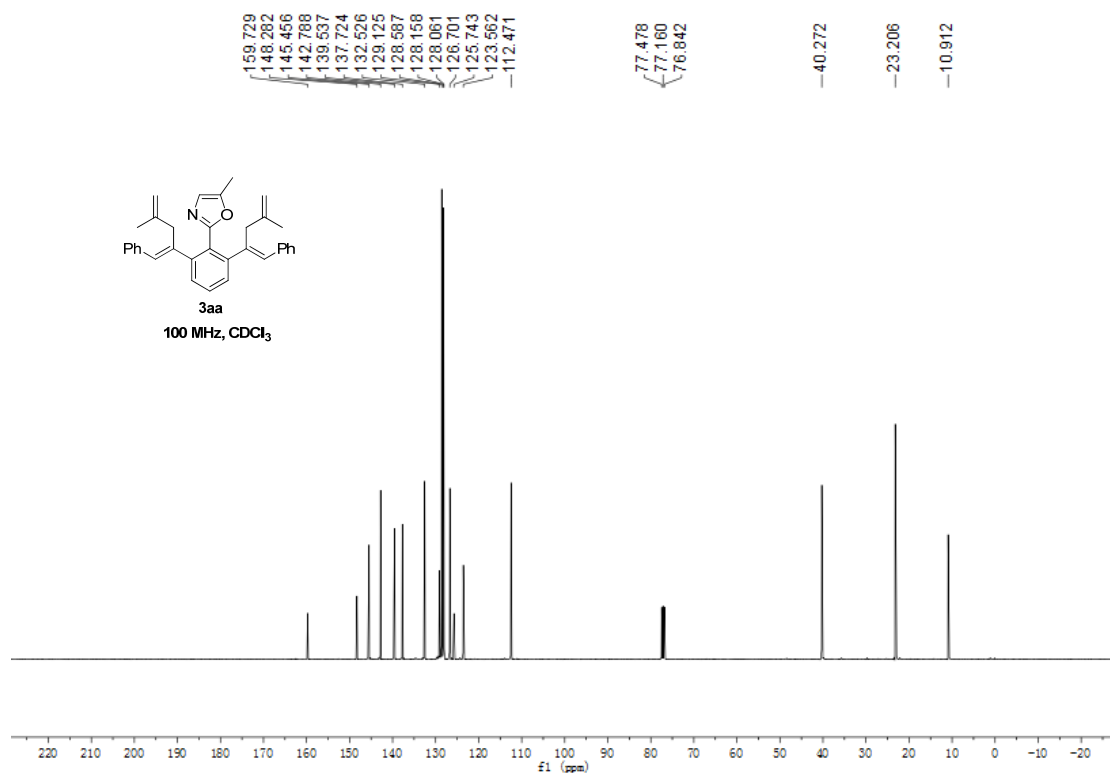

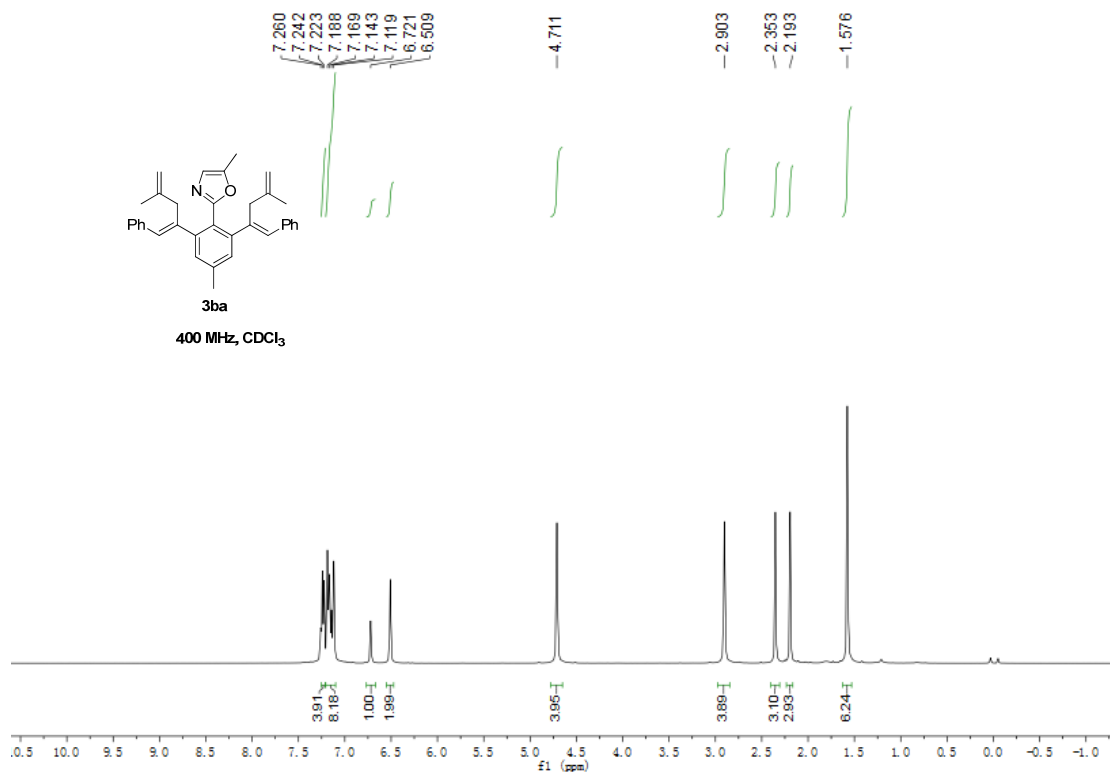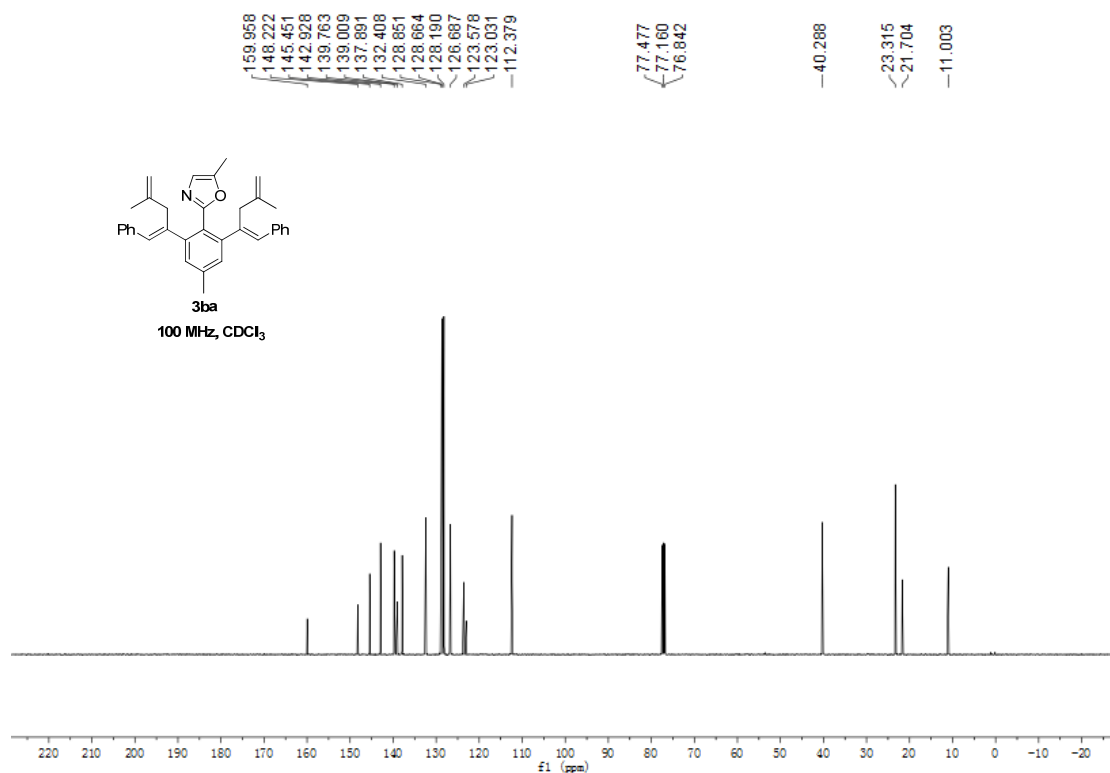

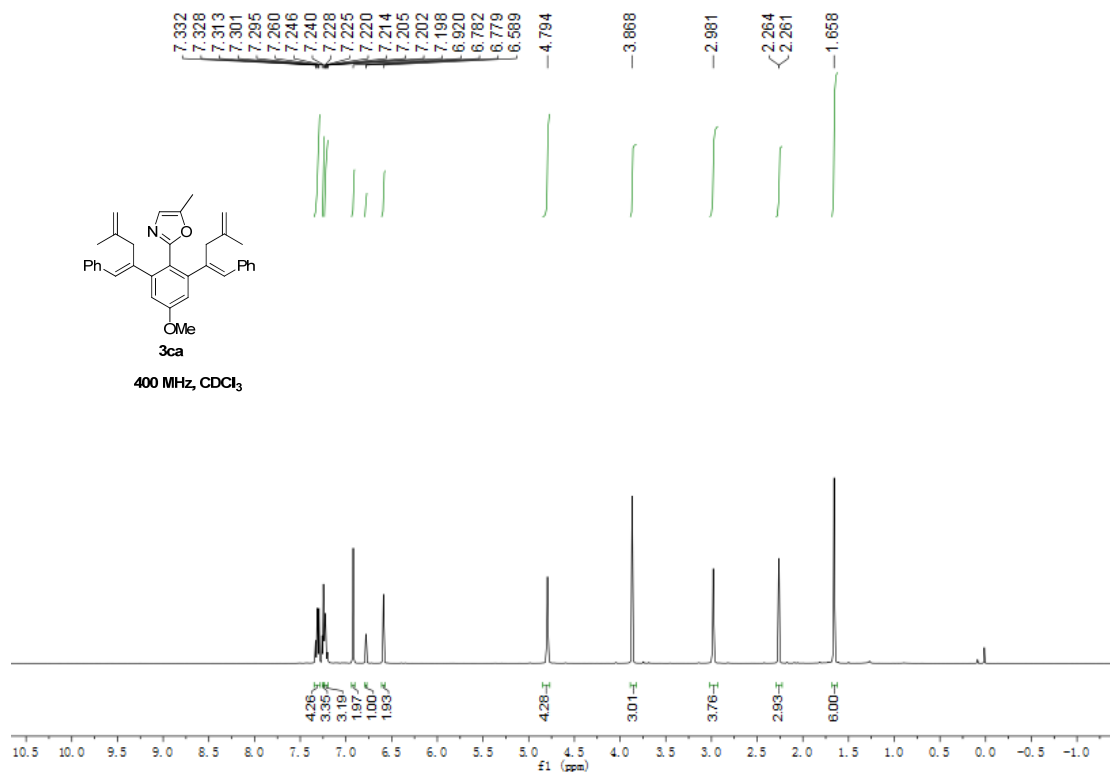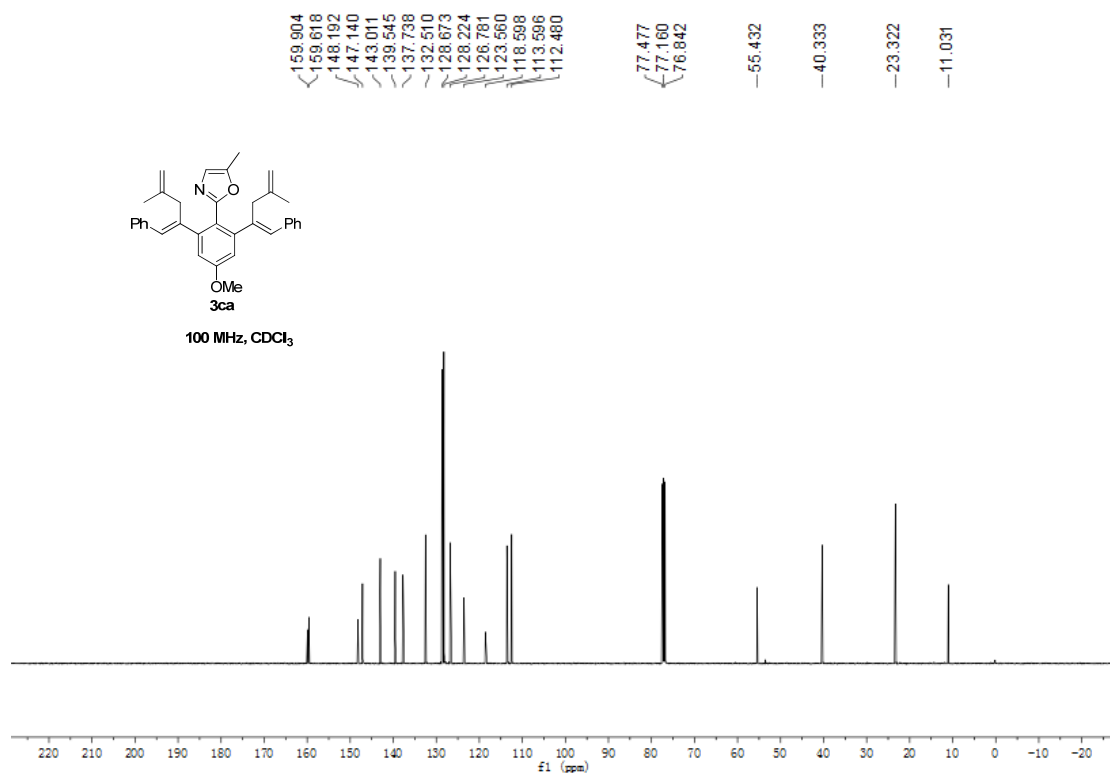

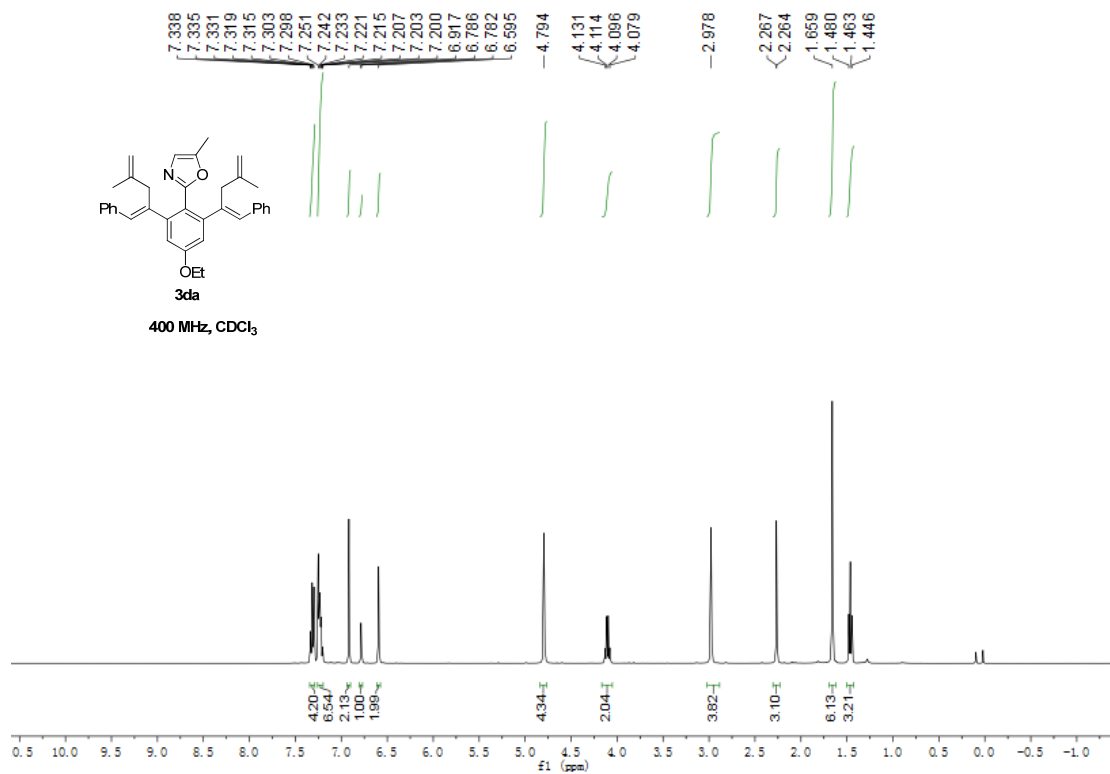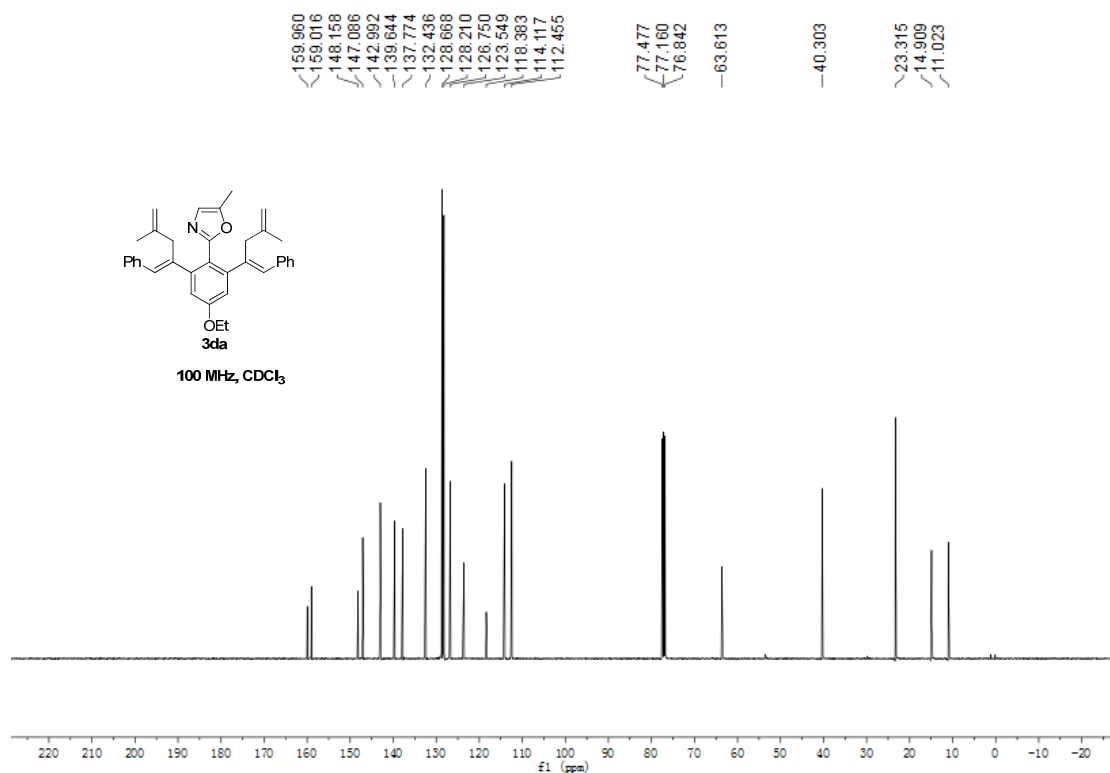

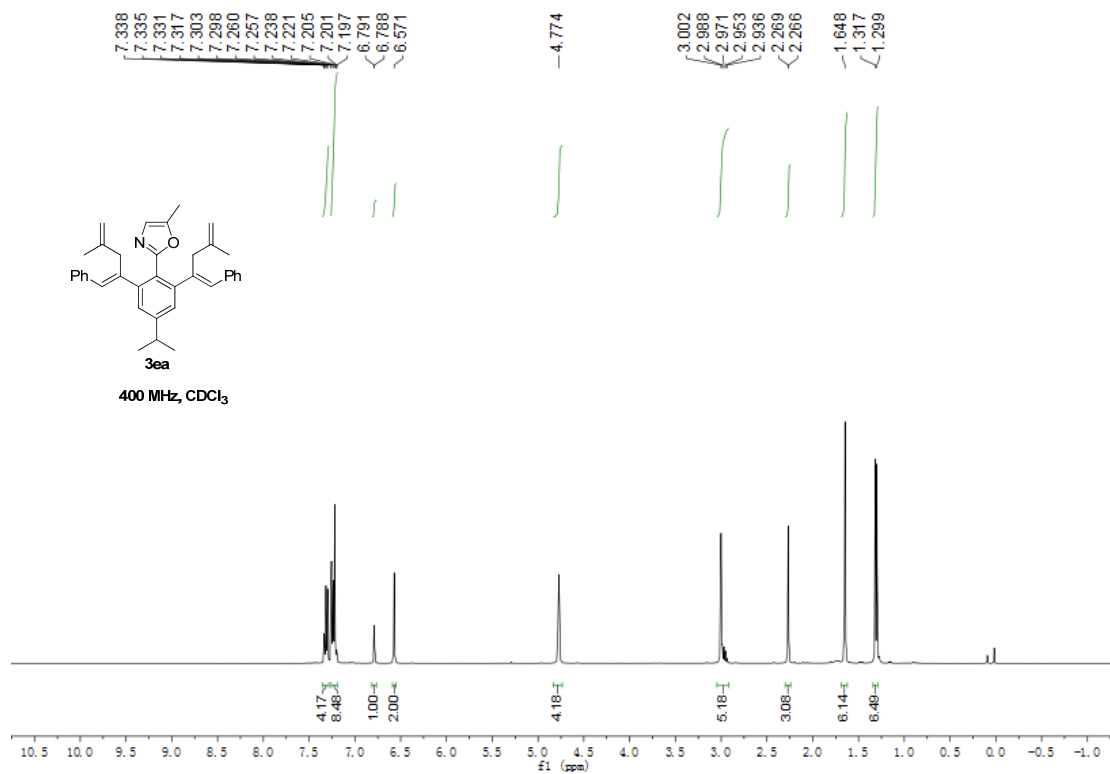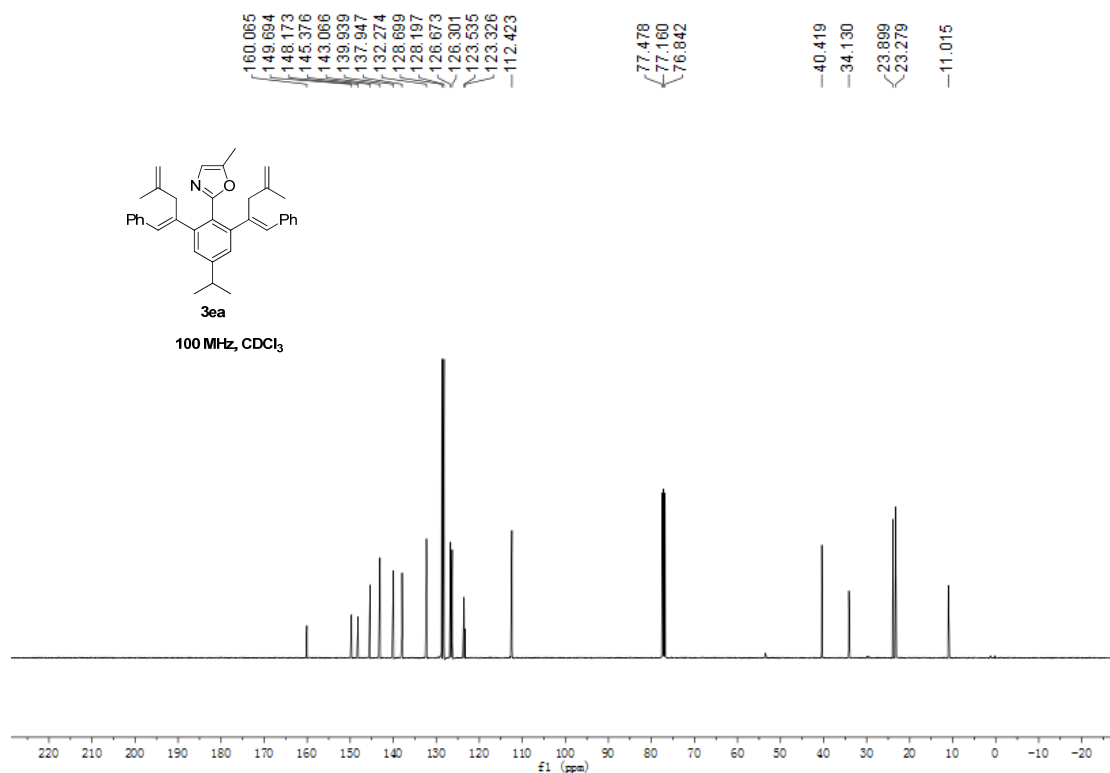

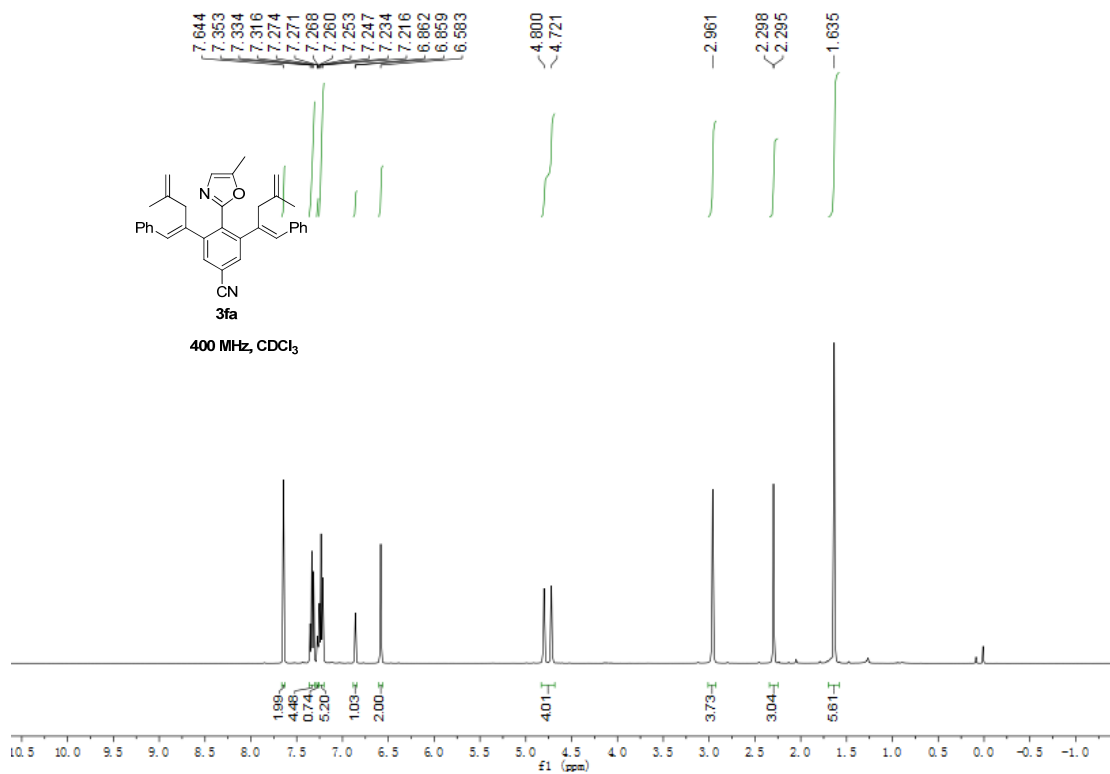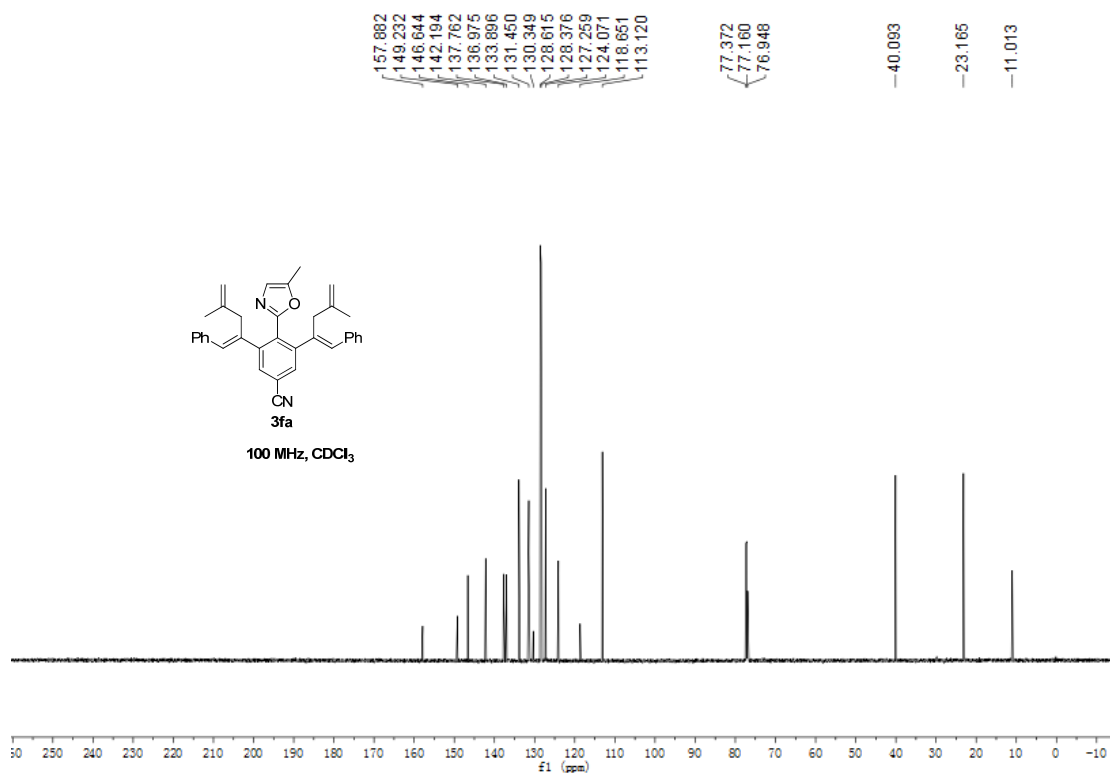

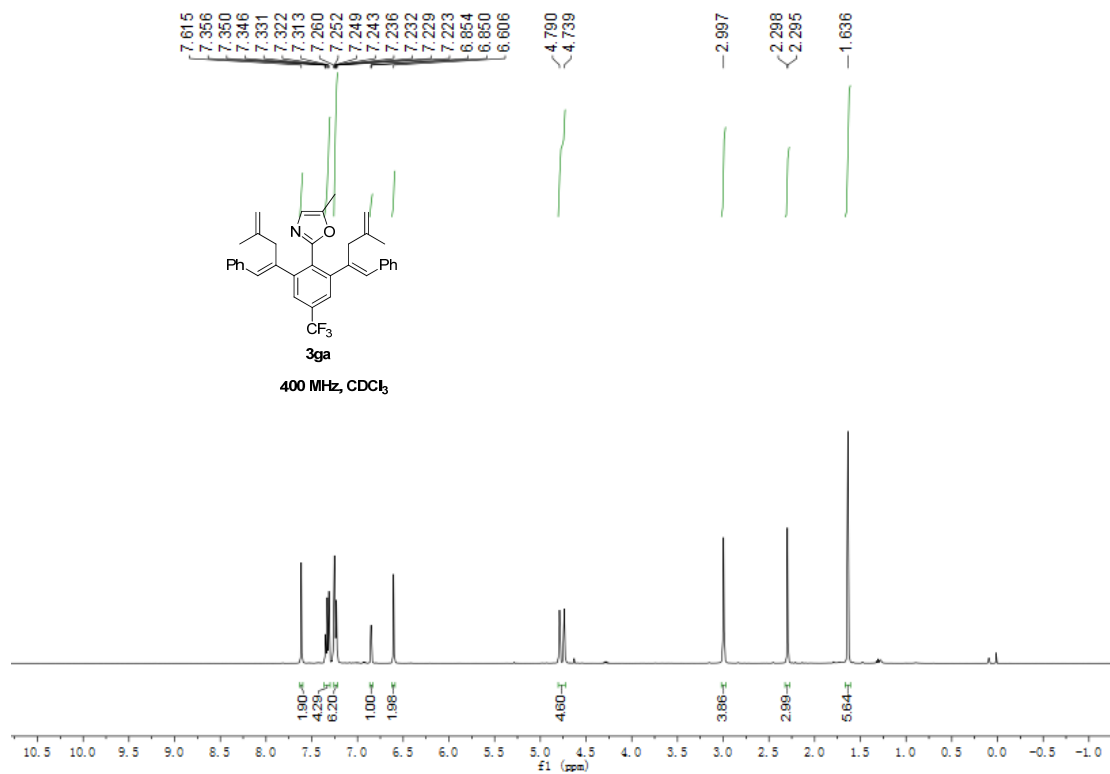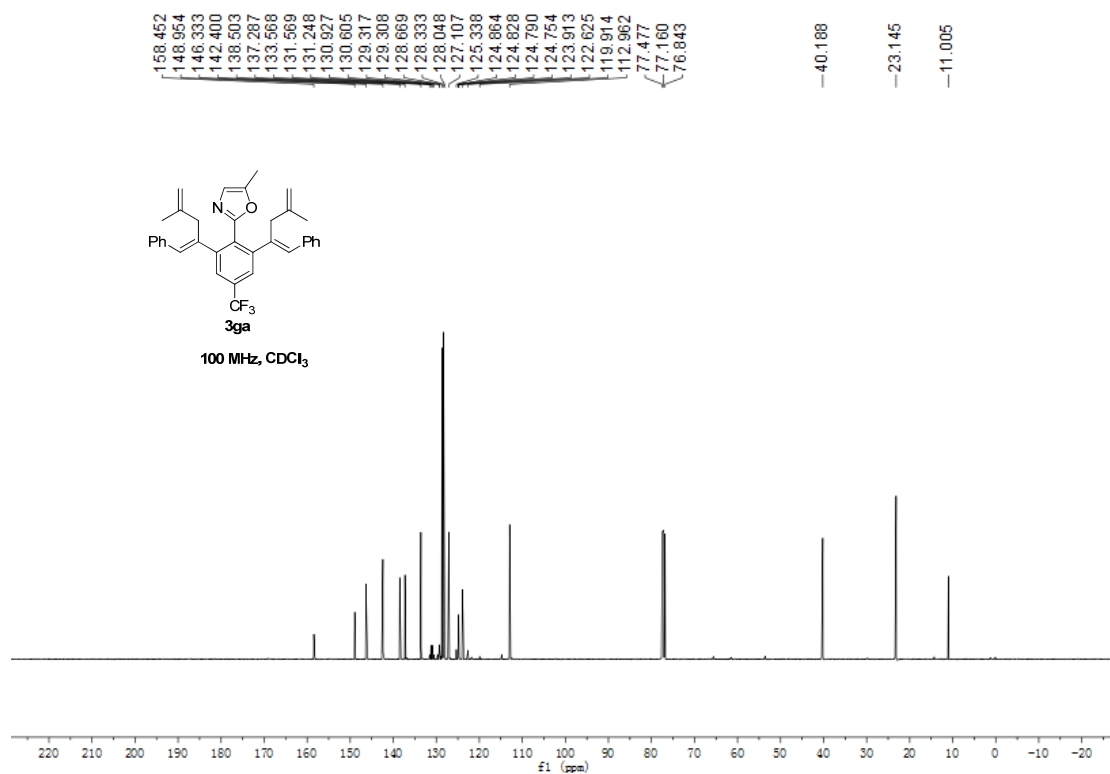



--62.789

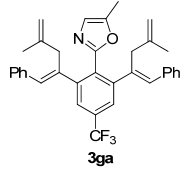

376 MHz, CDCl<sub>3</sub>

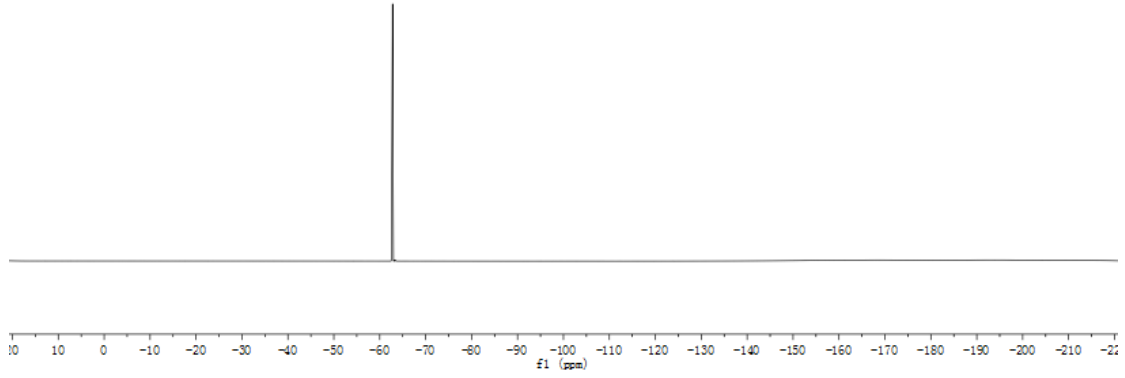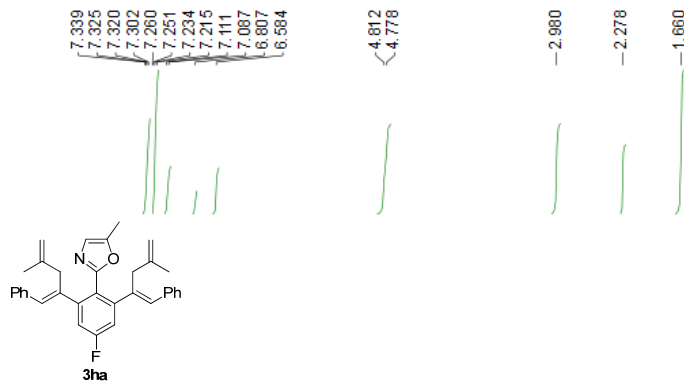

400 MHz, CDCl<sub>3</sub>

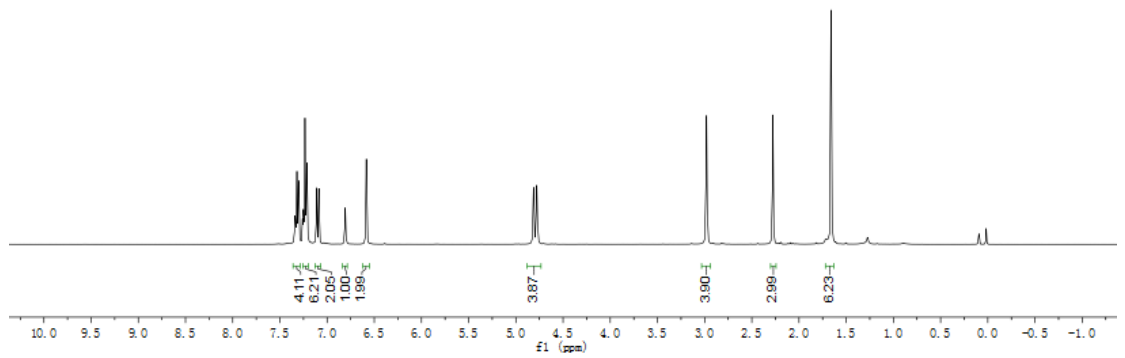

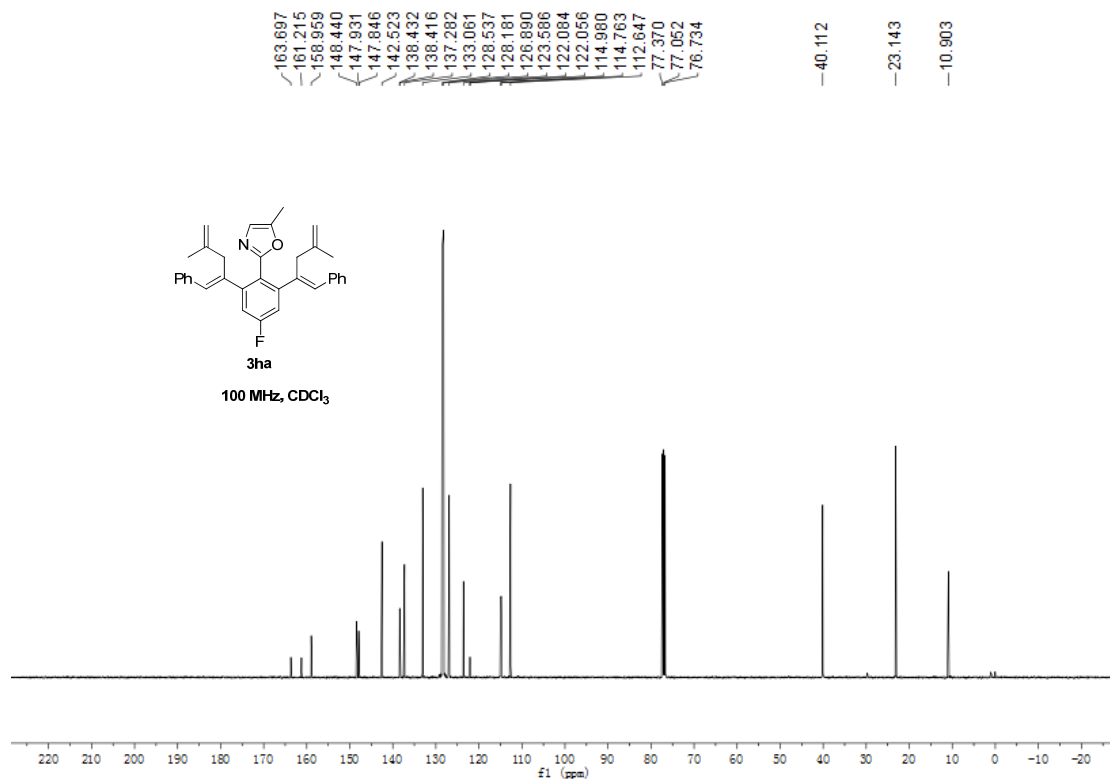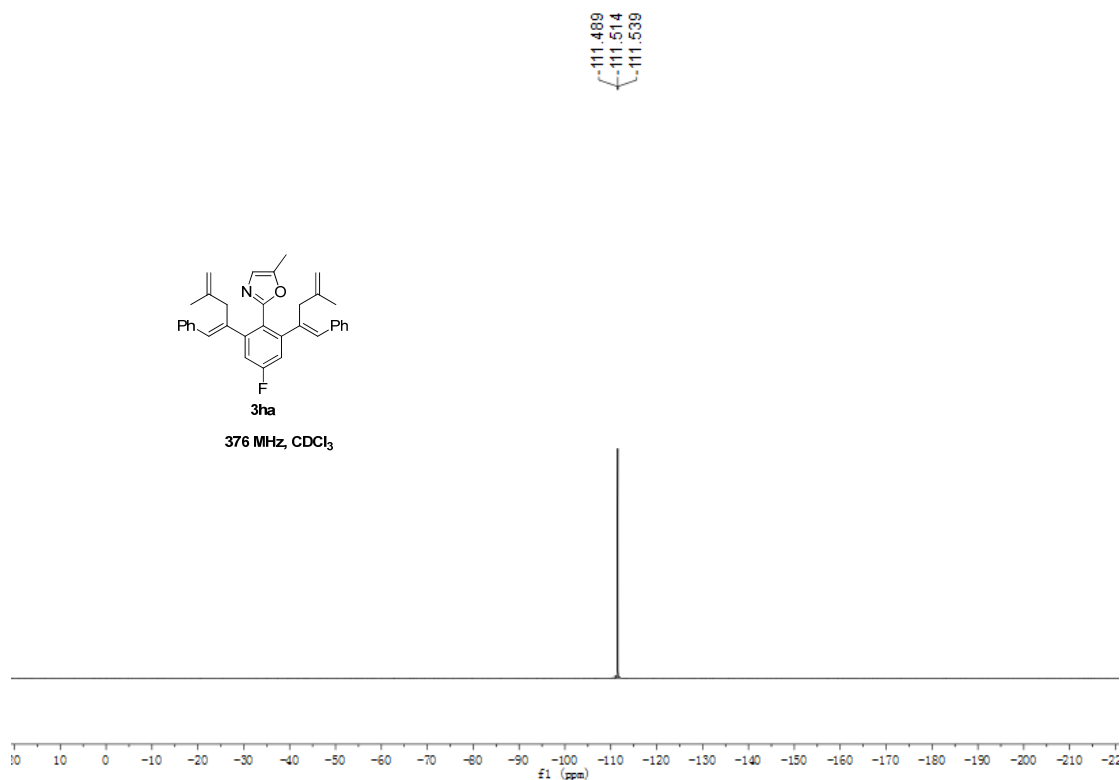

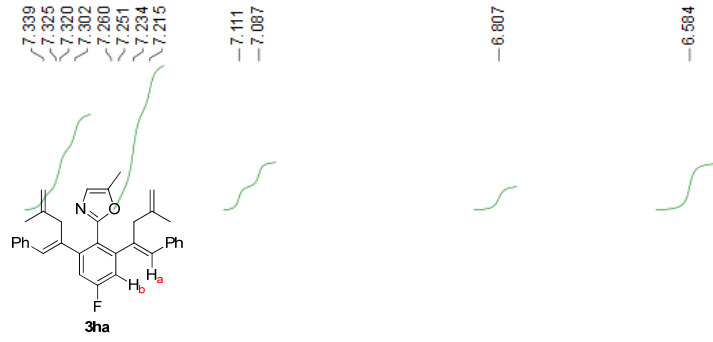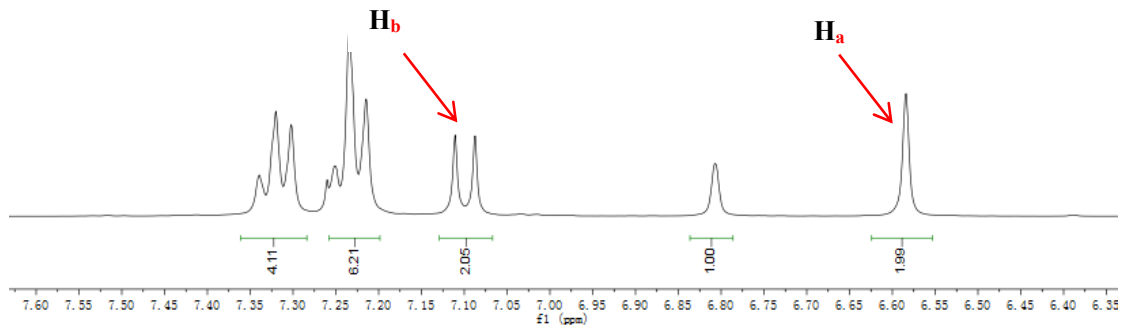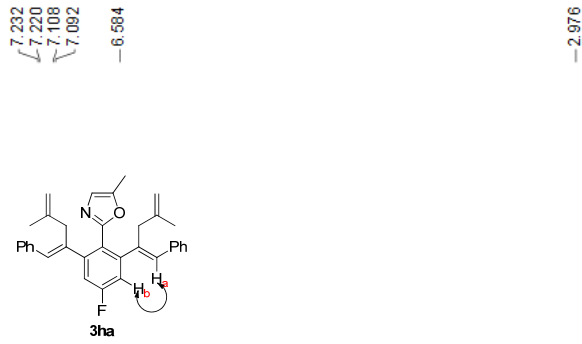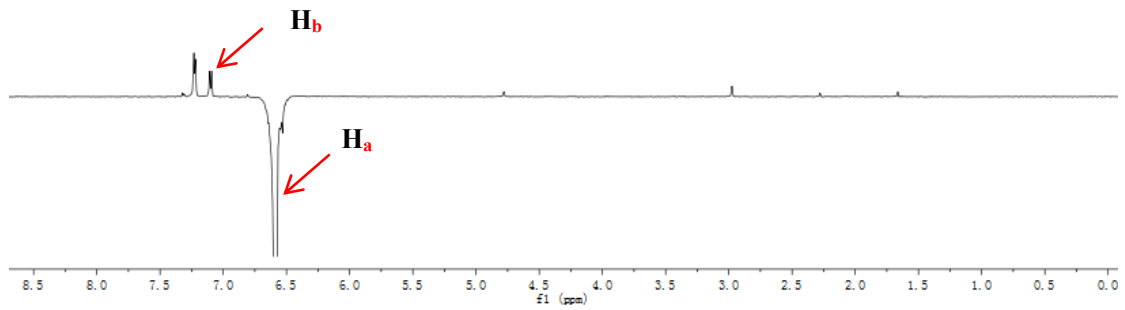

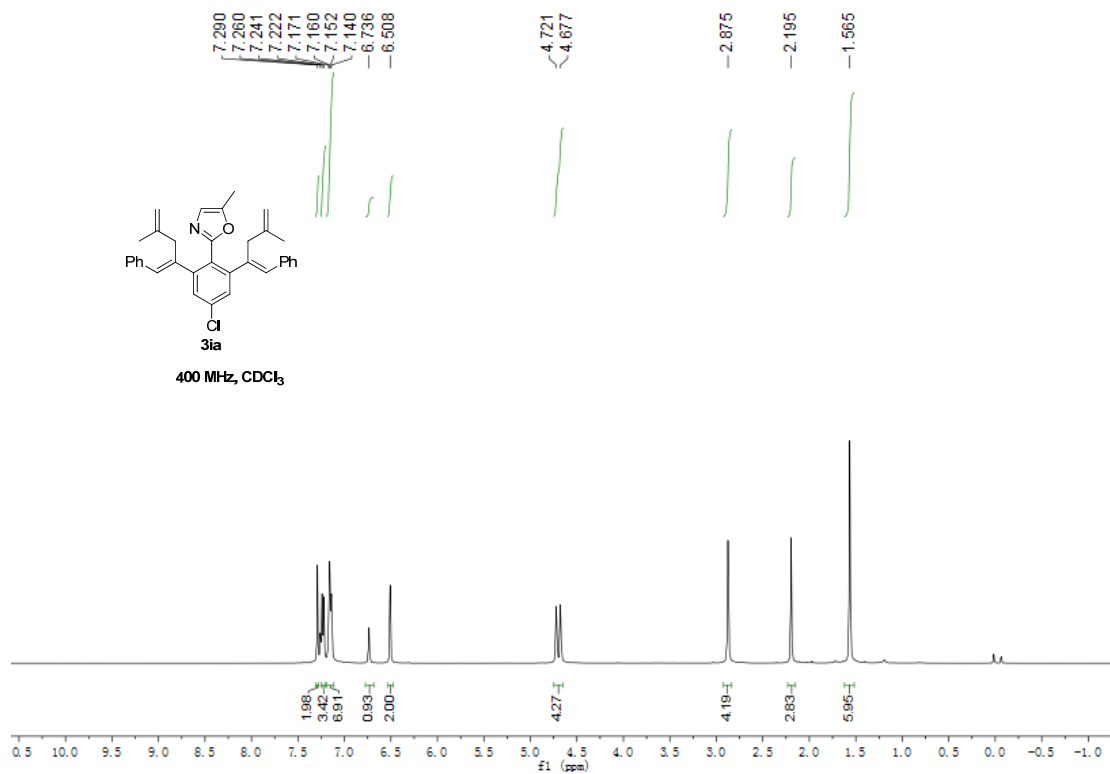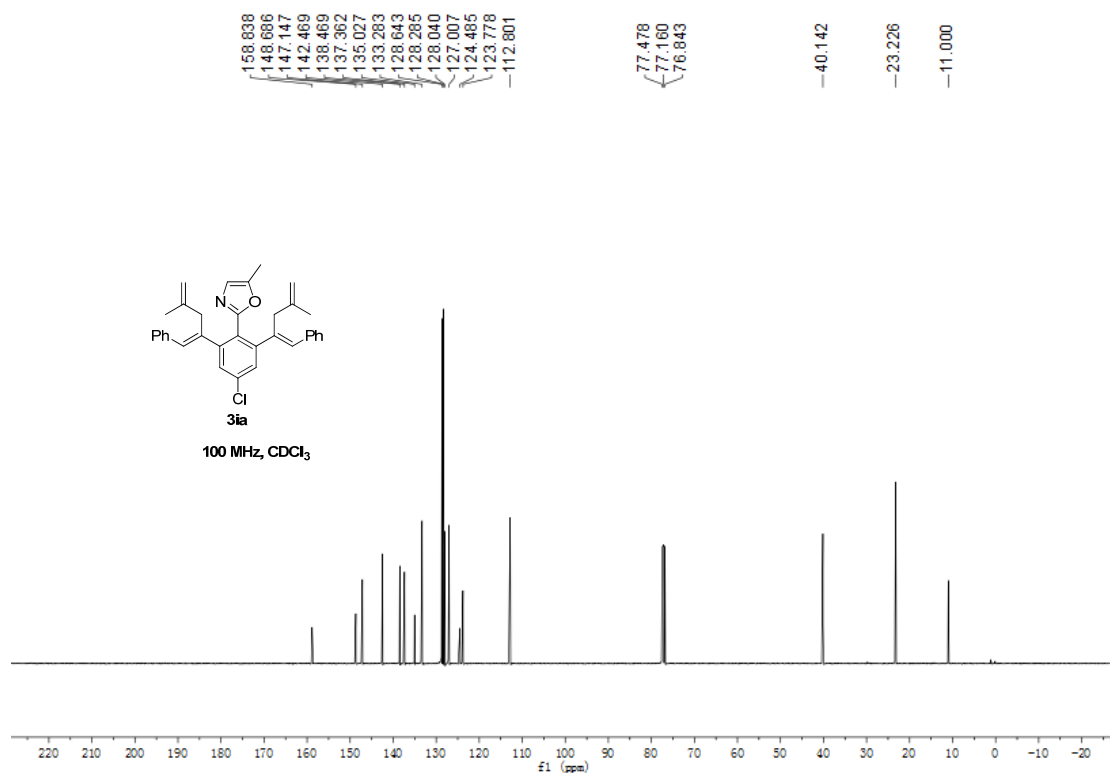

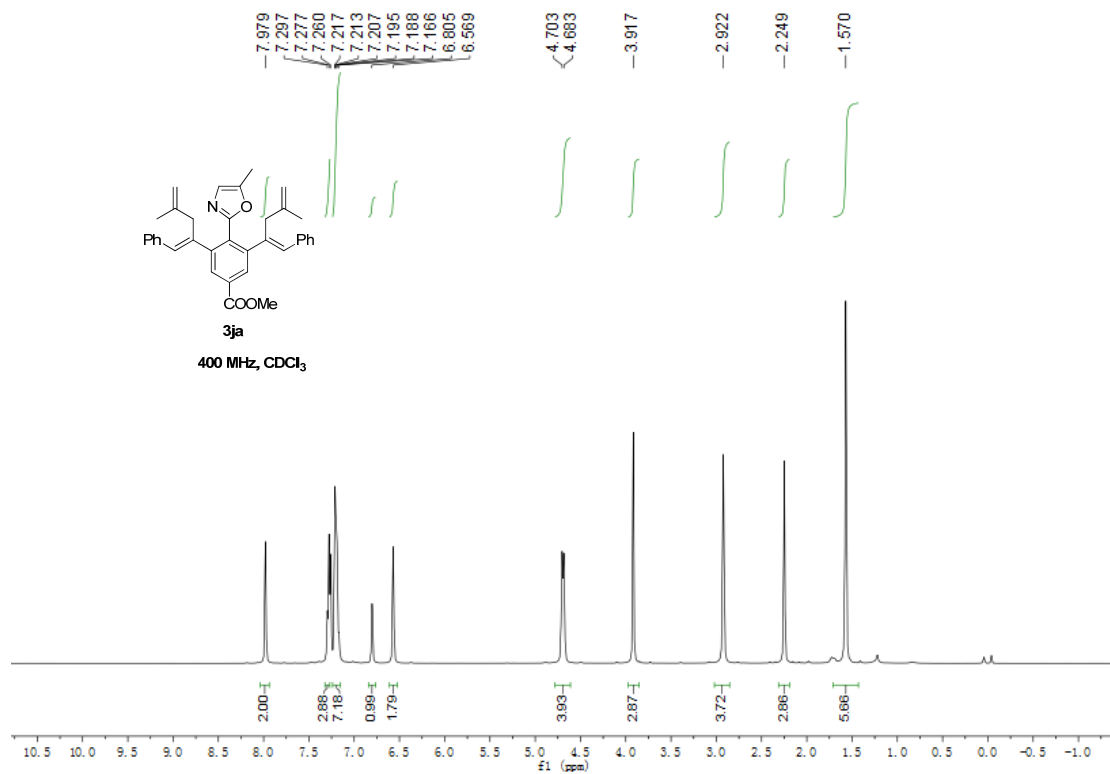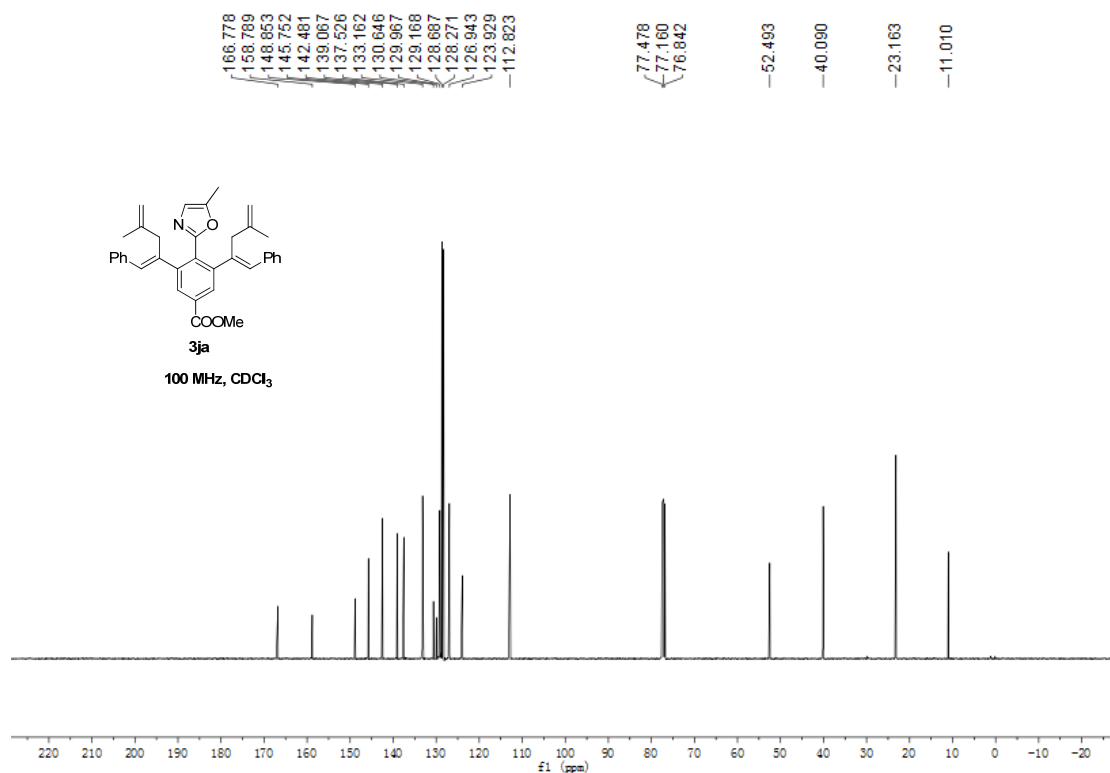

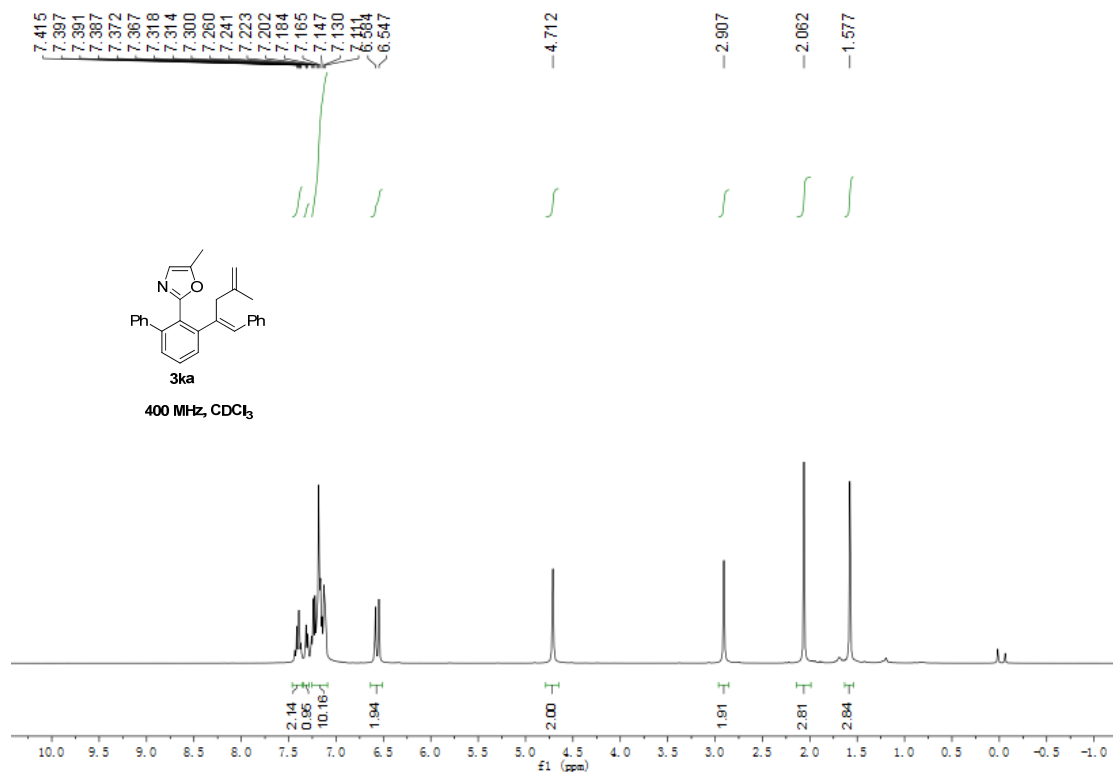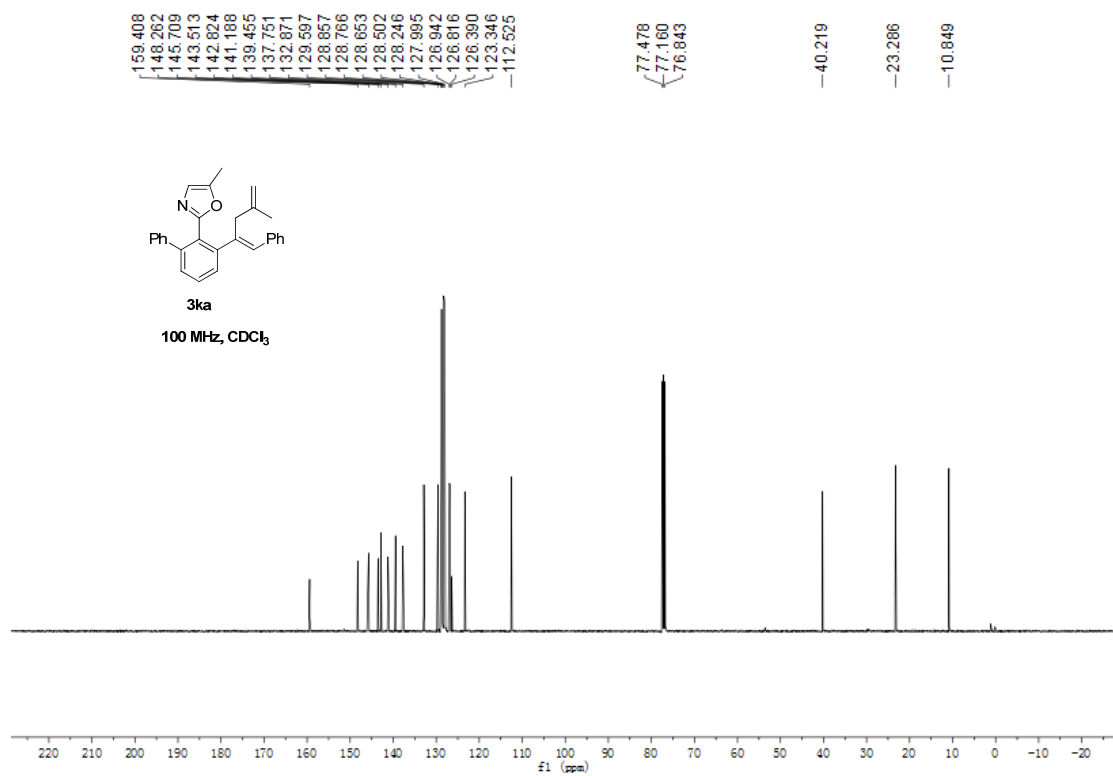

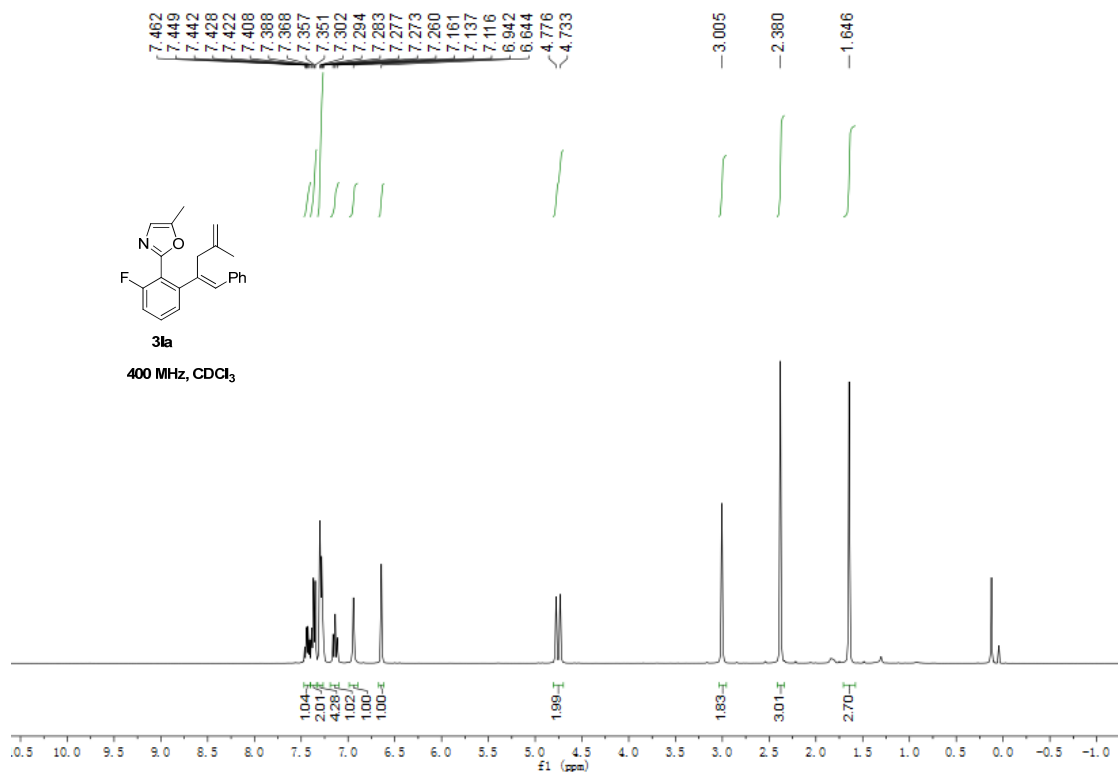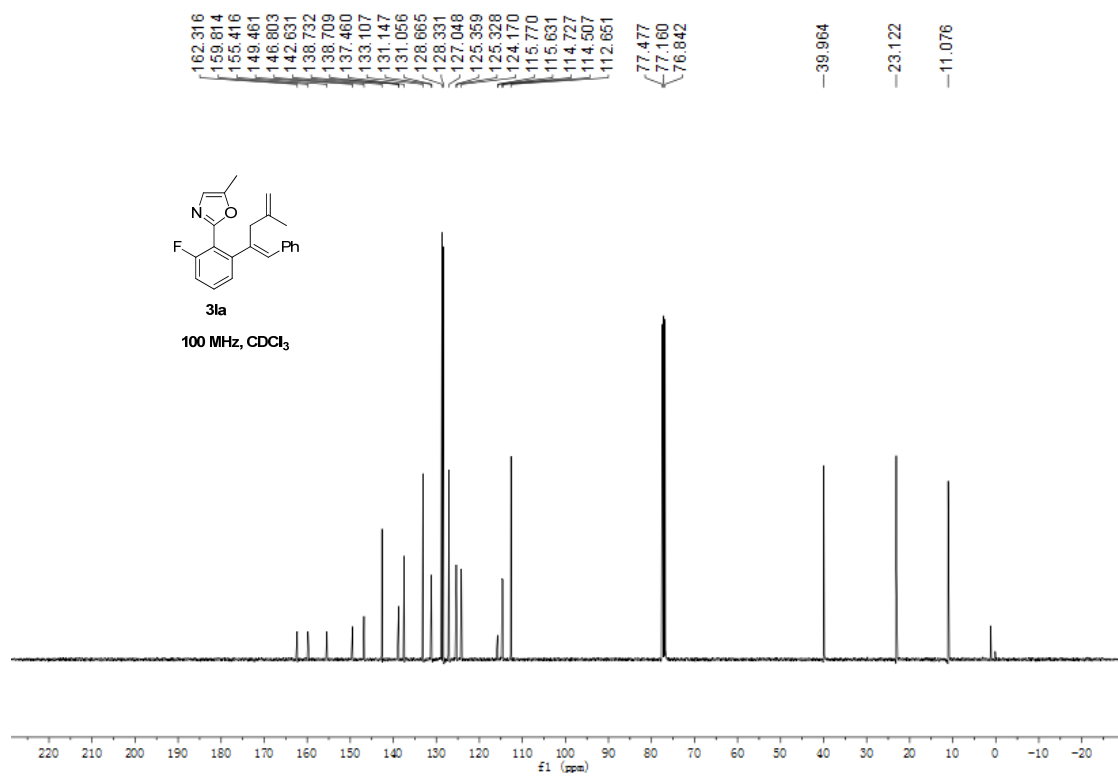

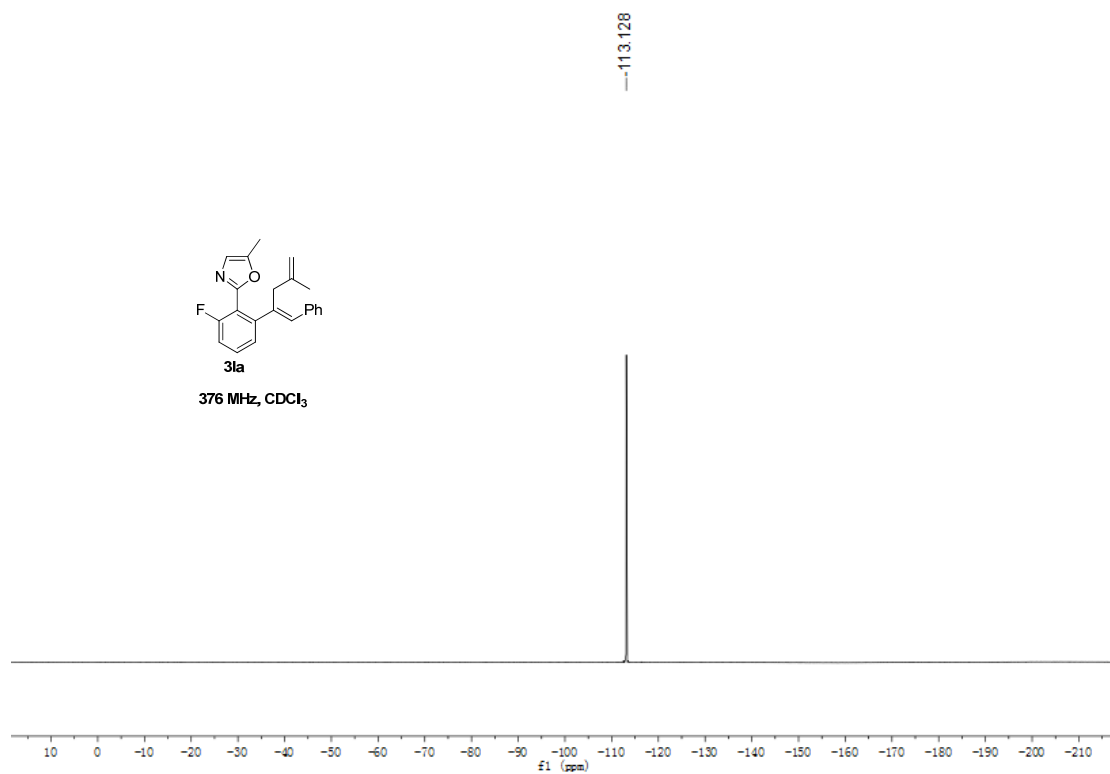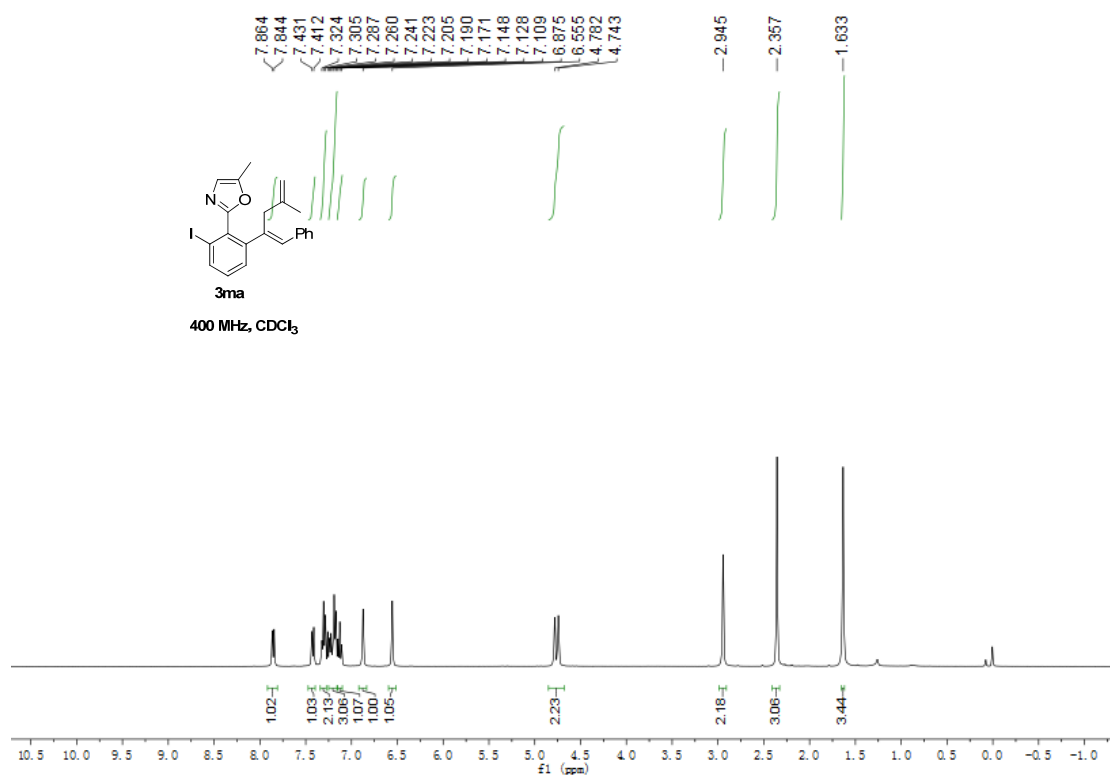



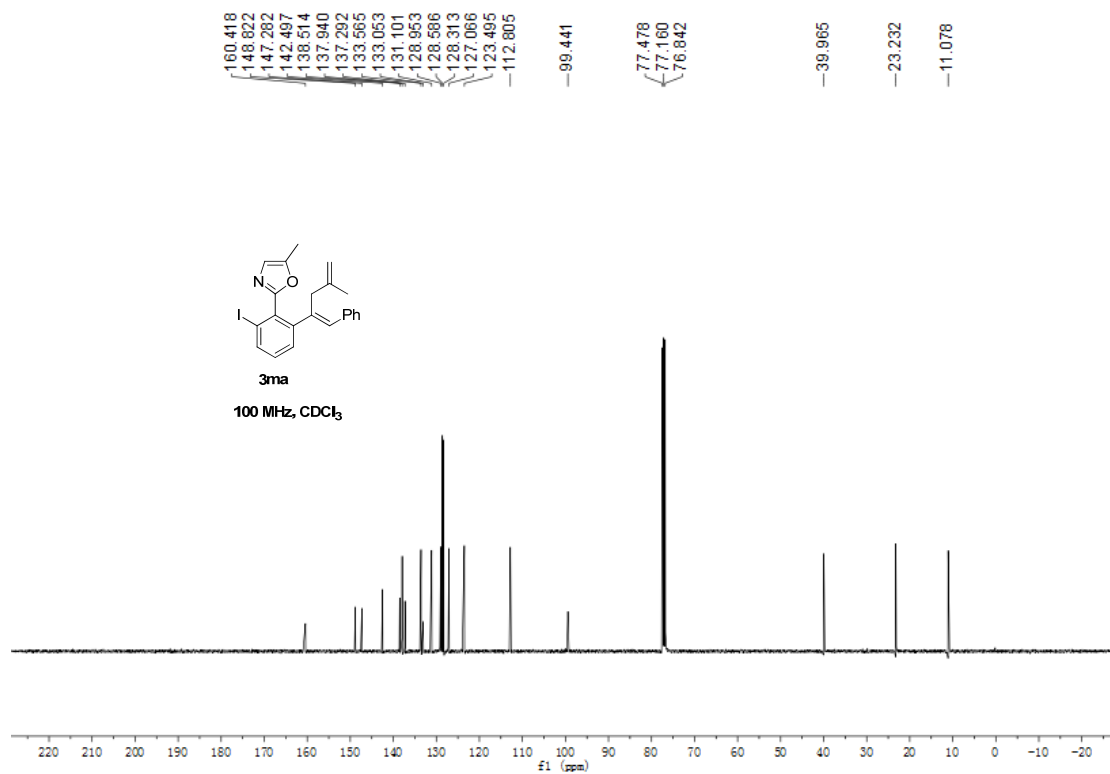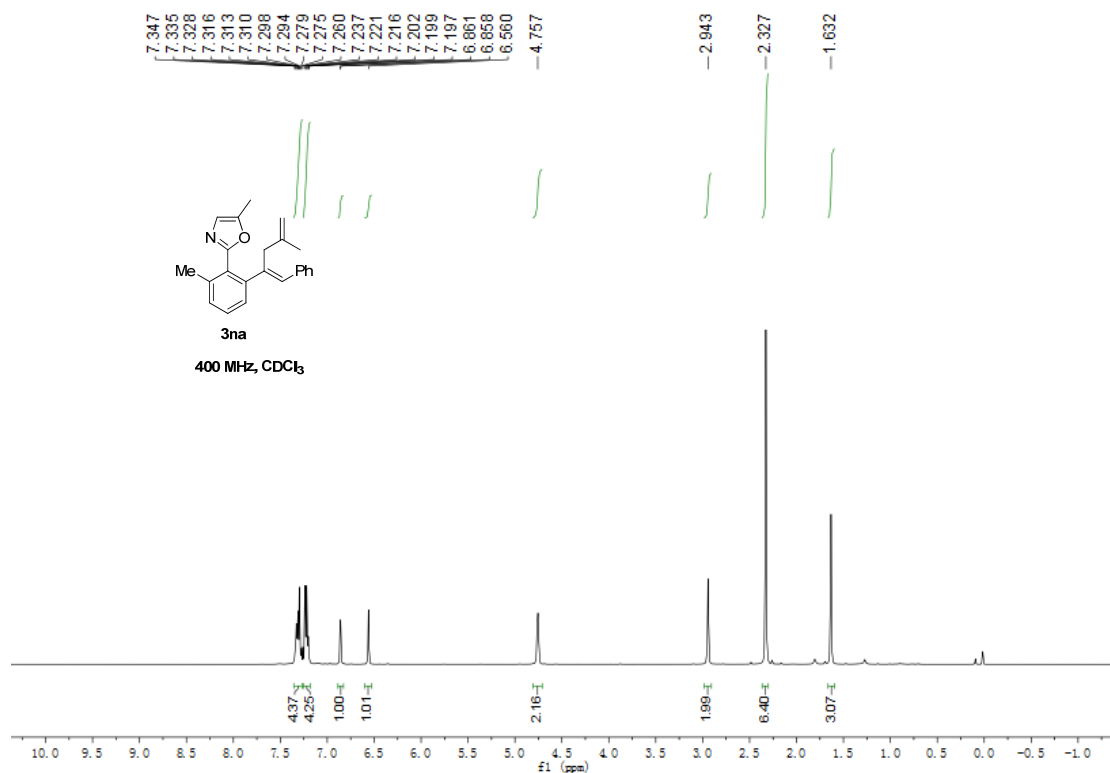

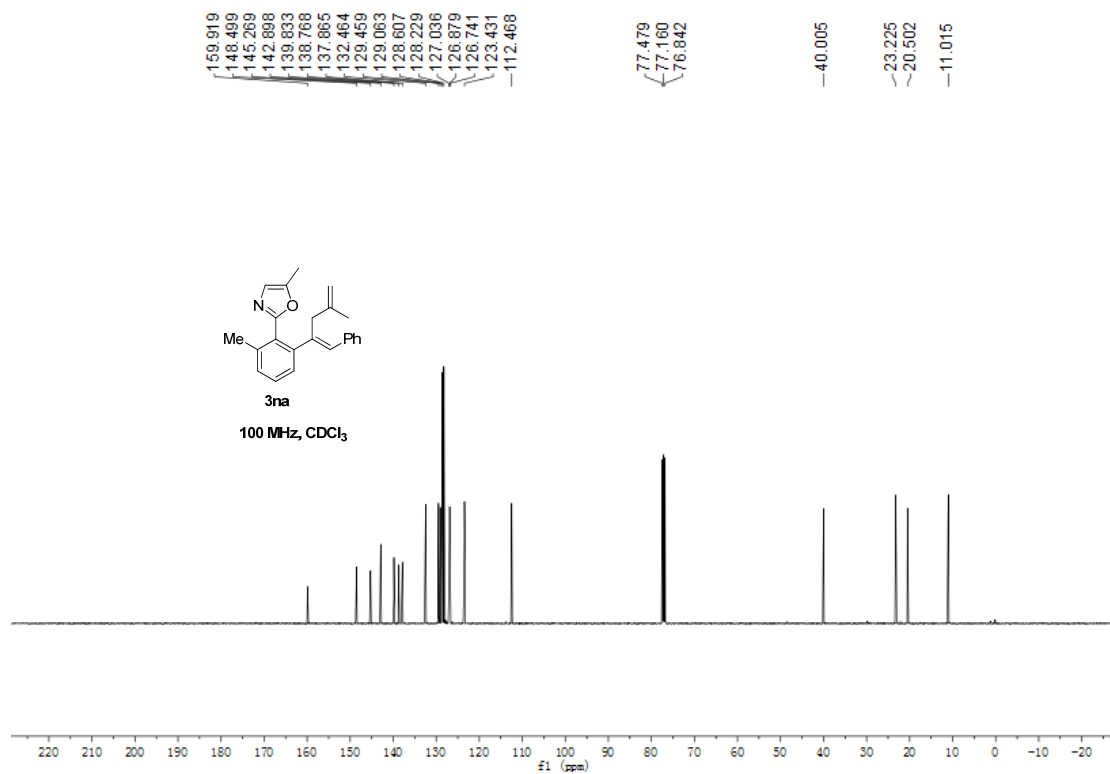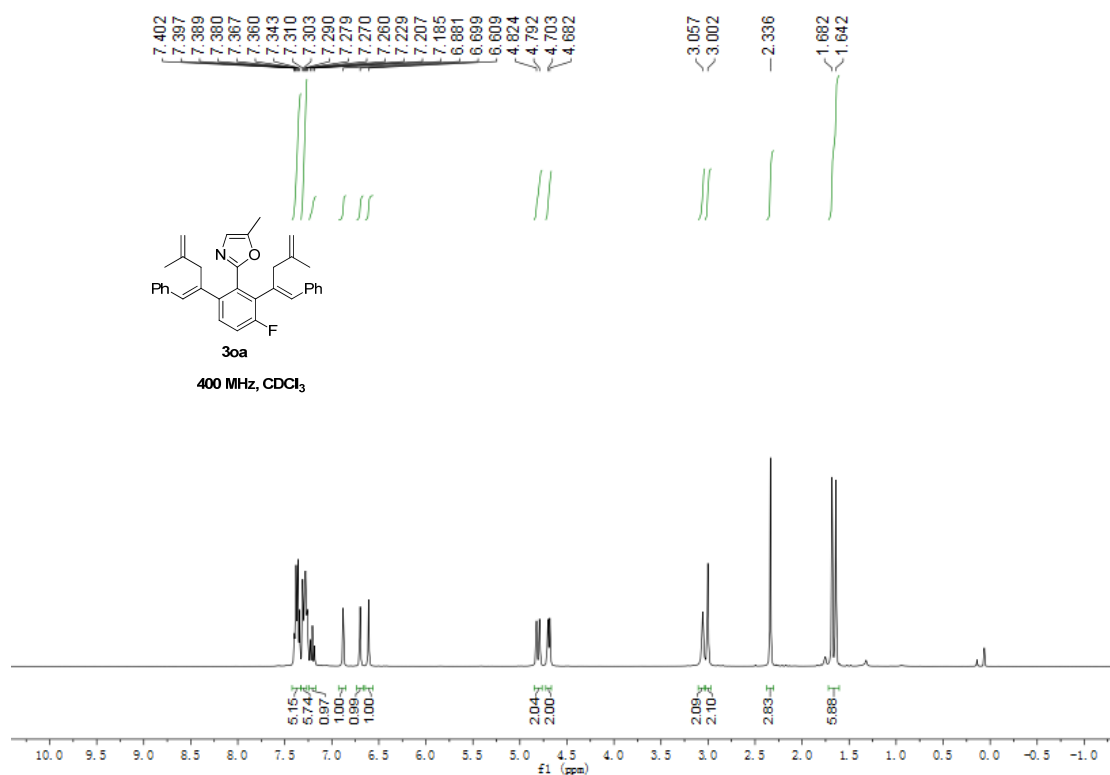

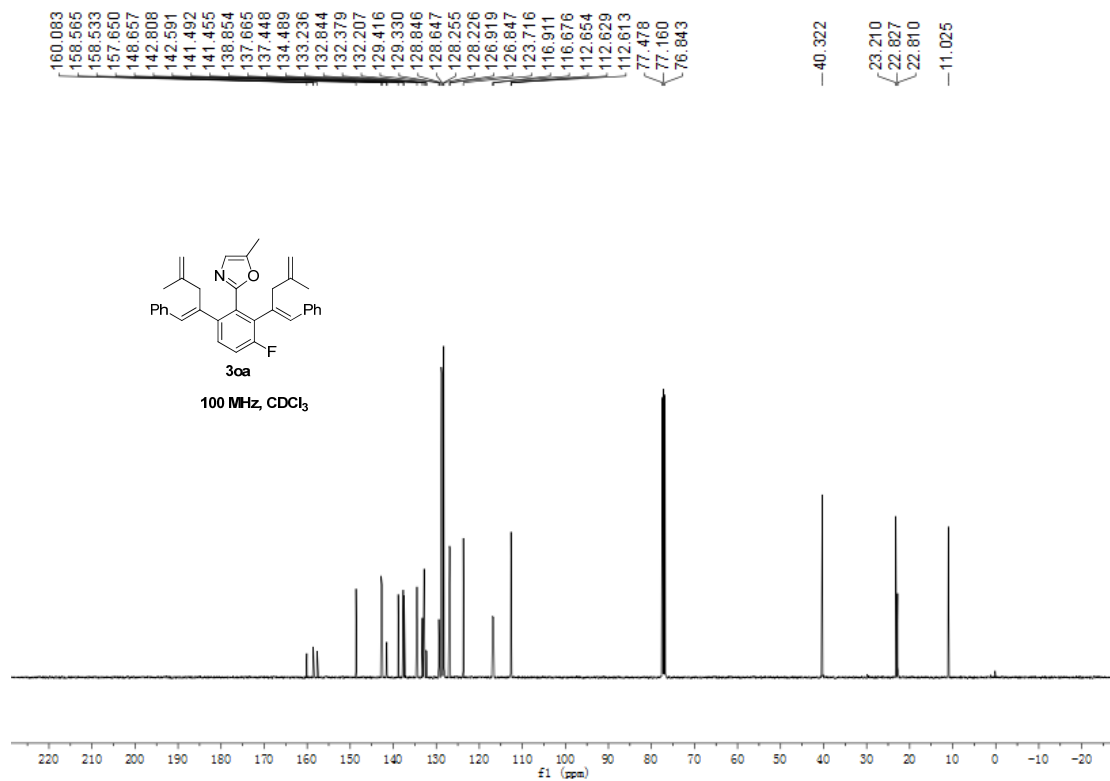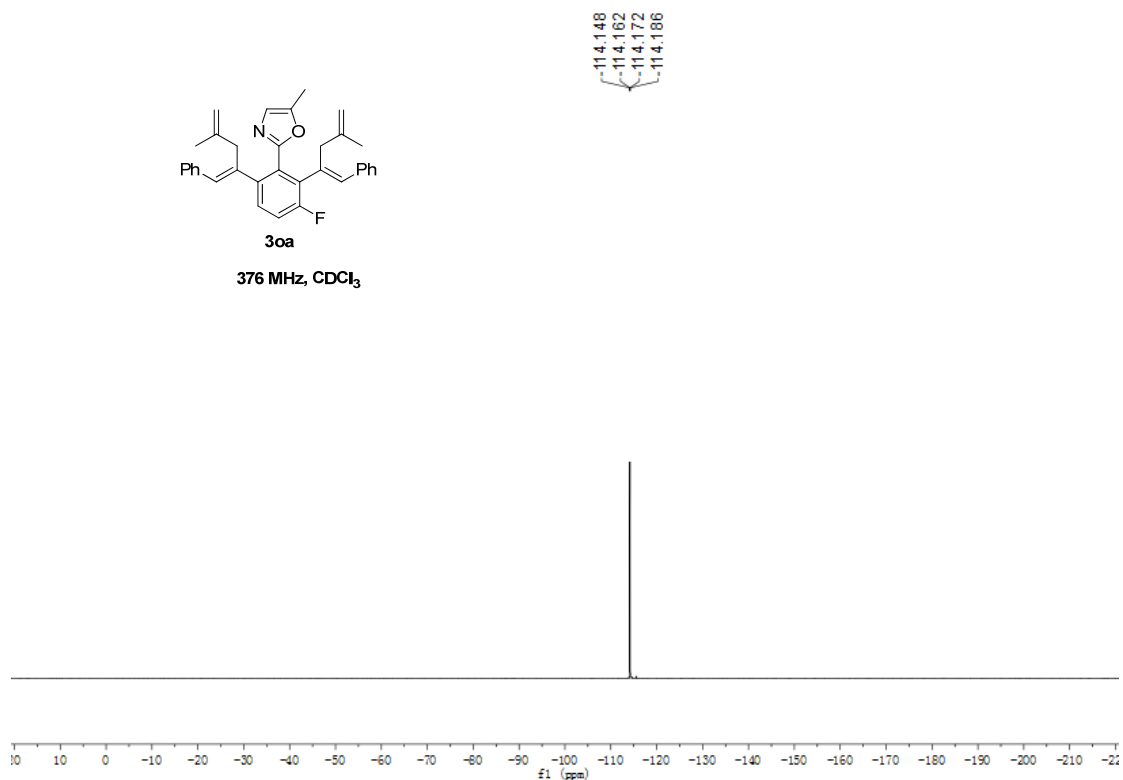

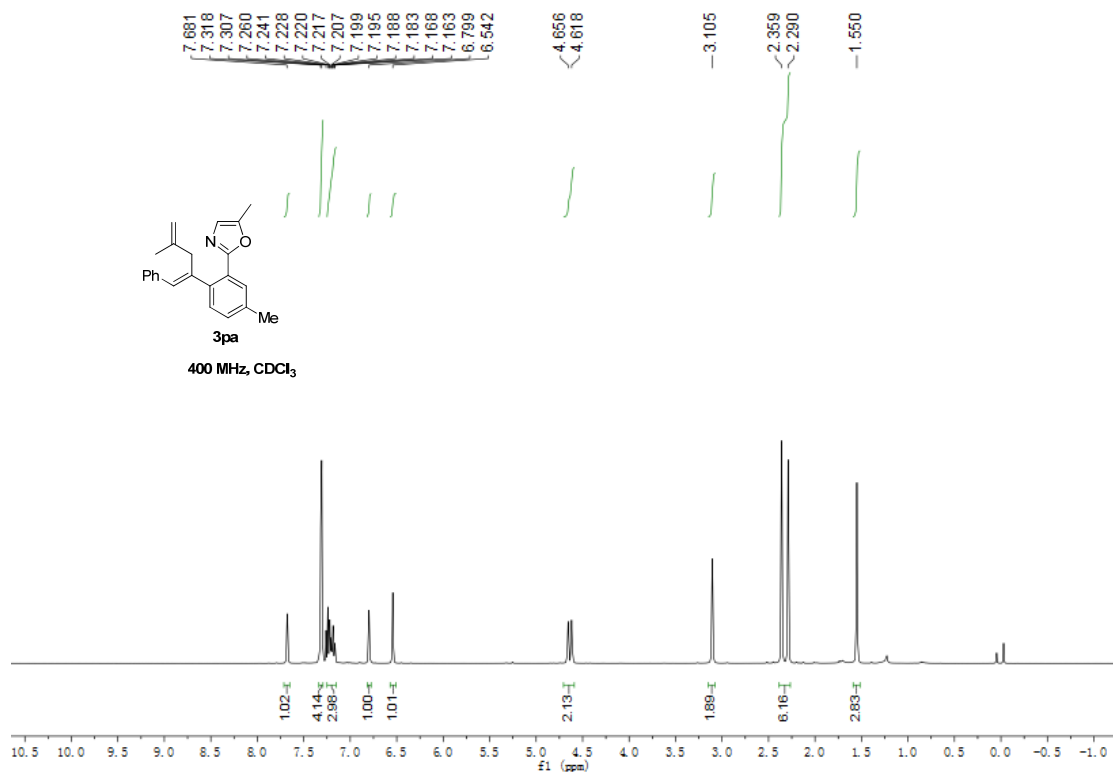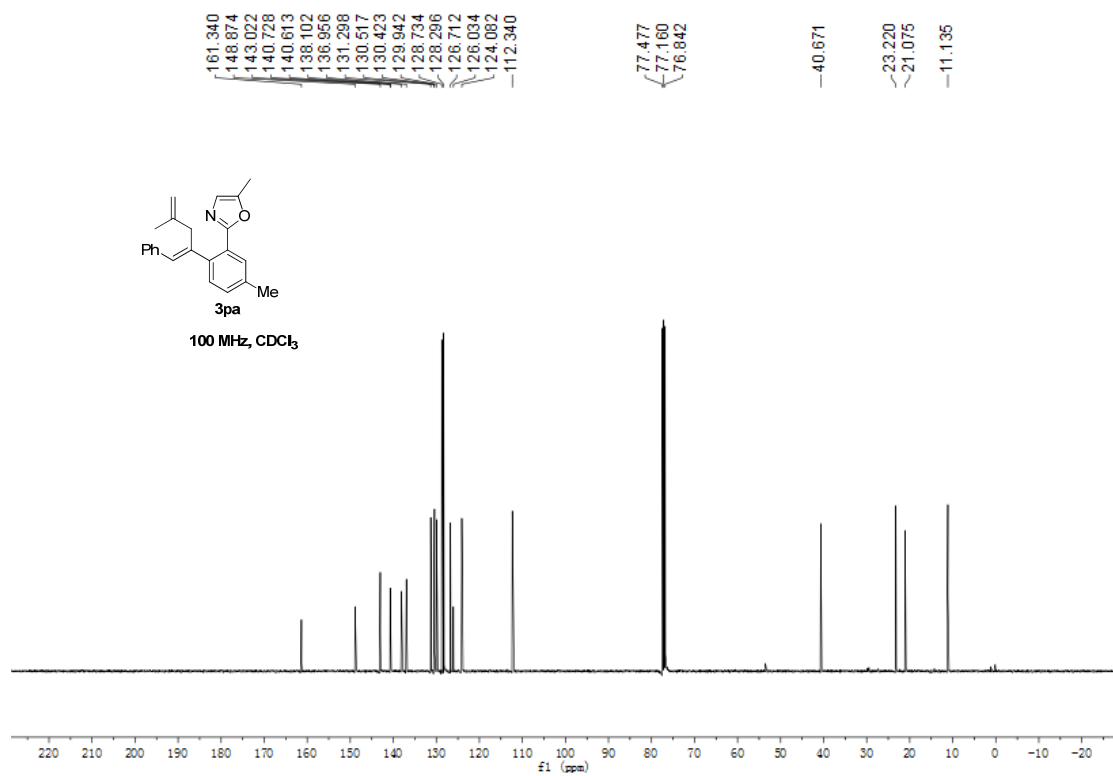

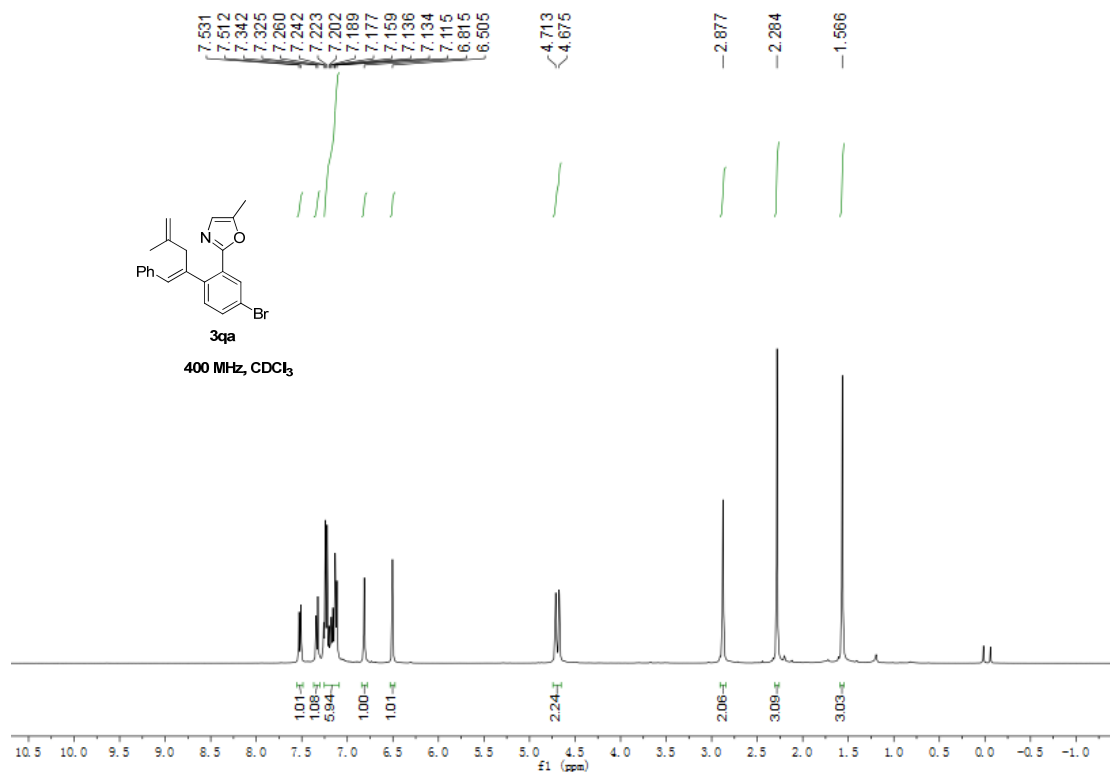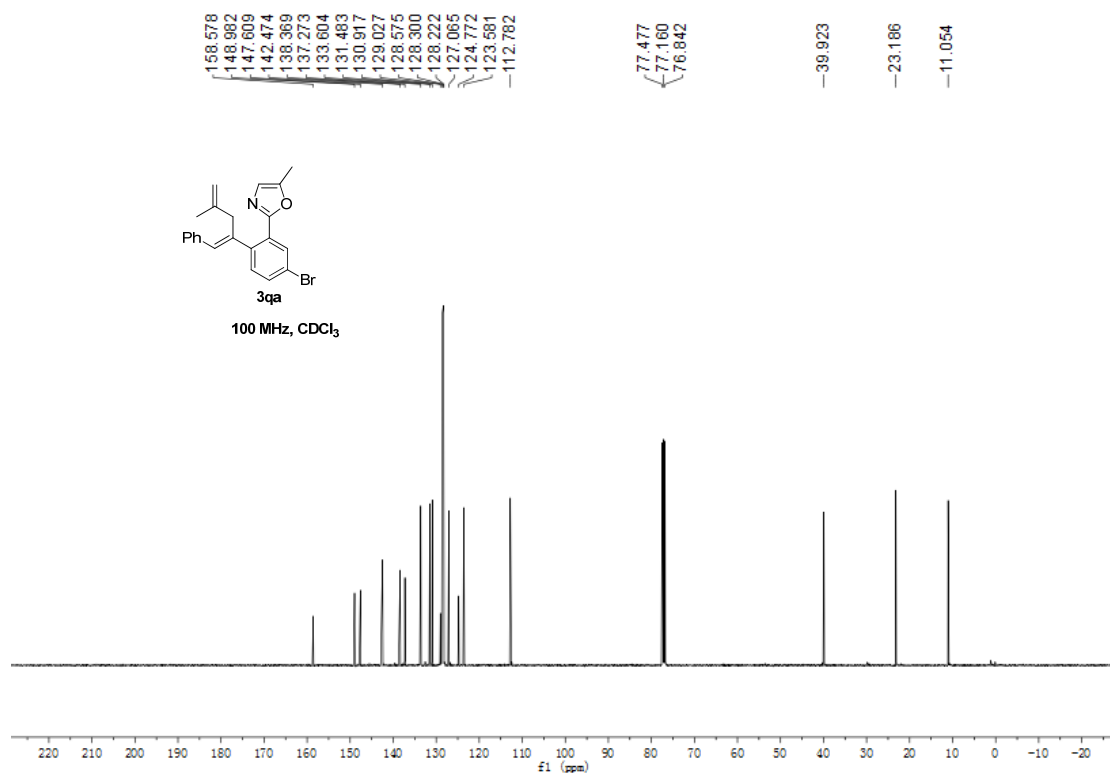

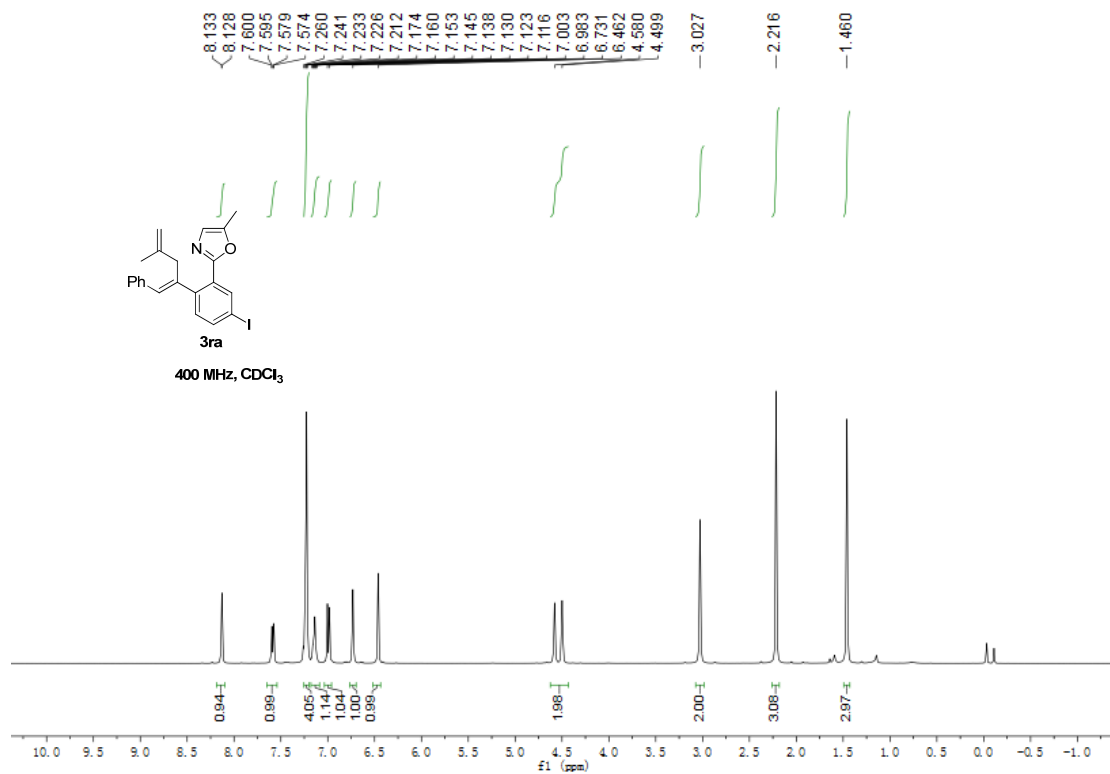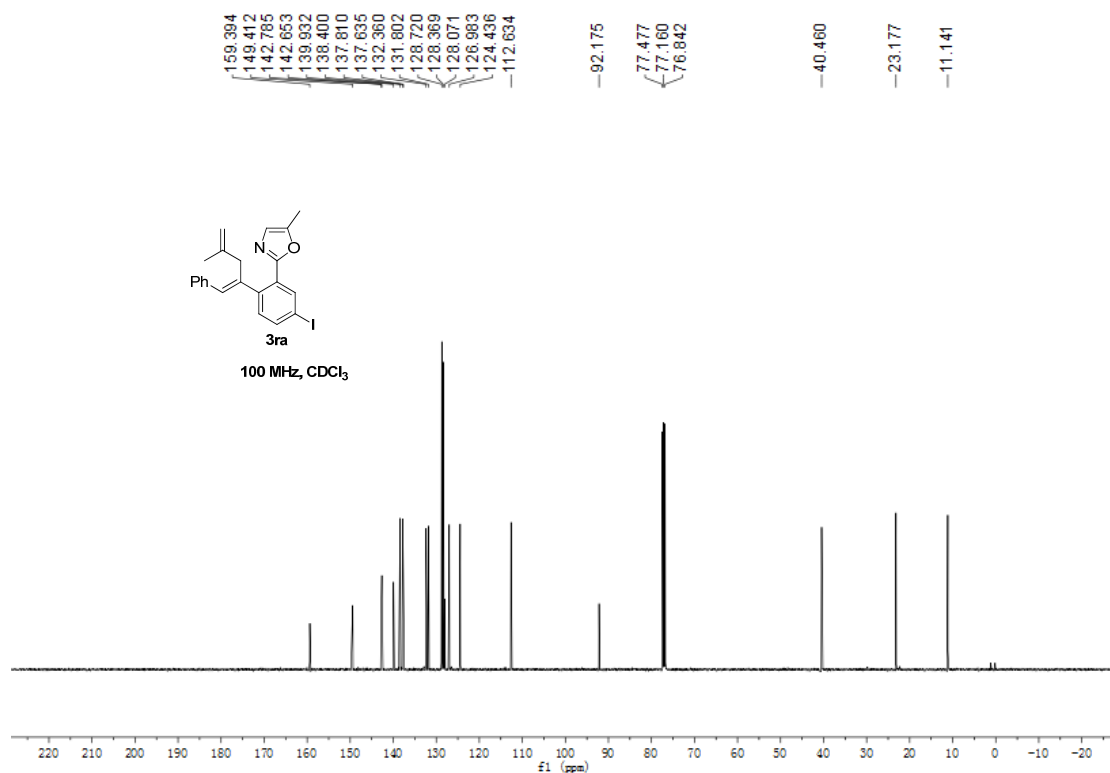

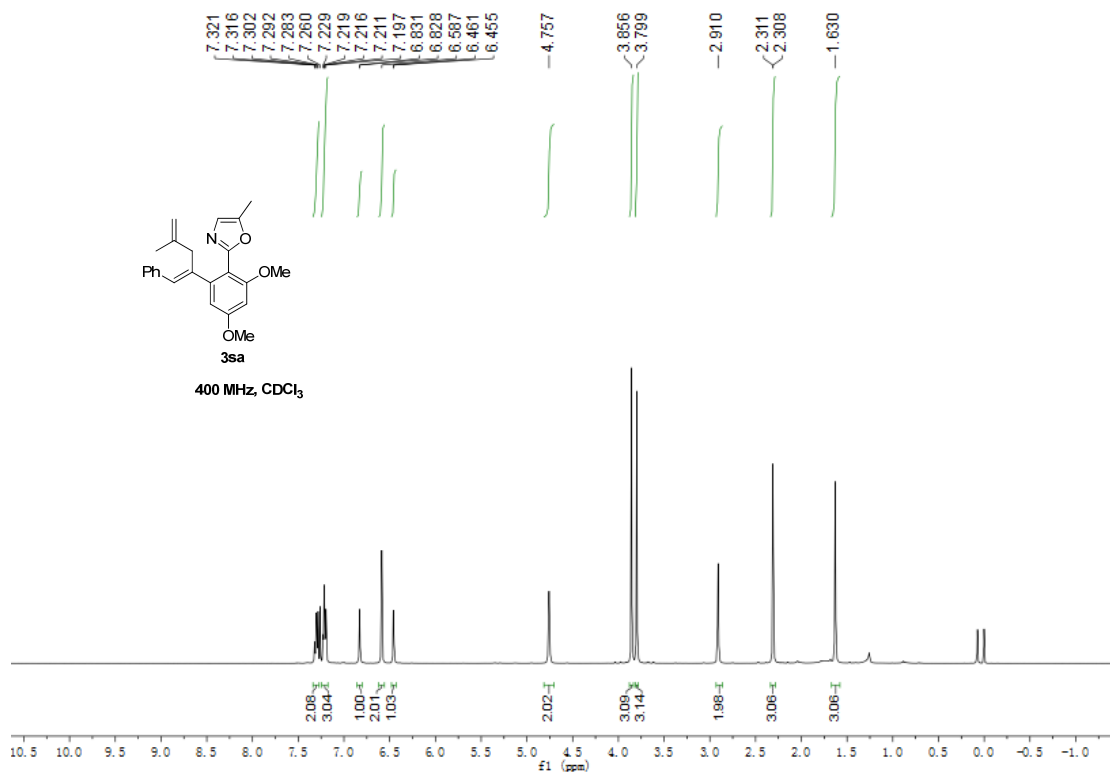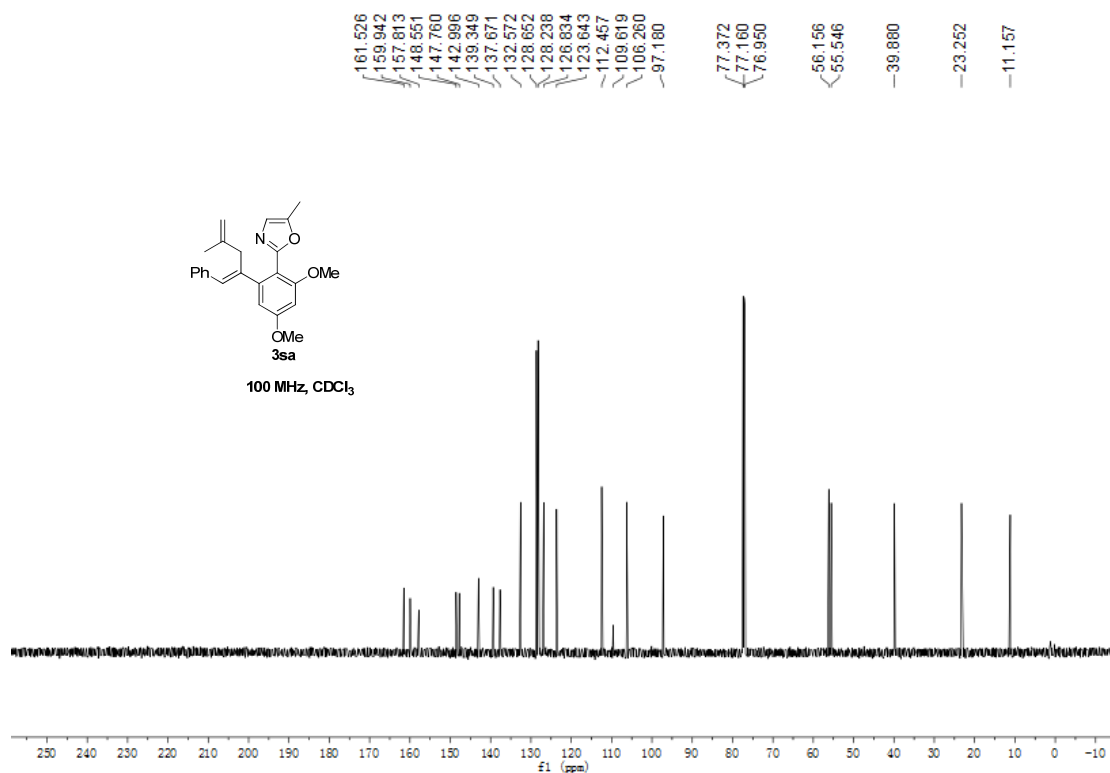

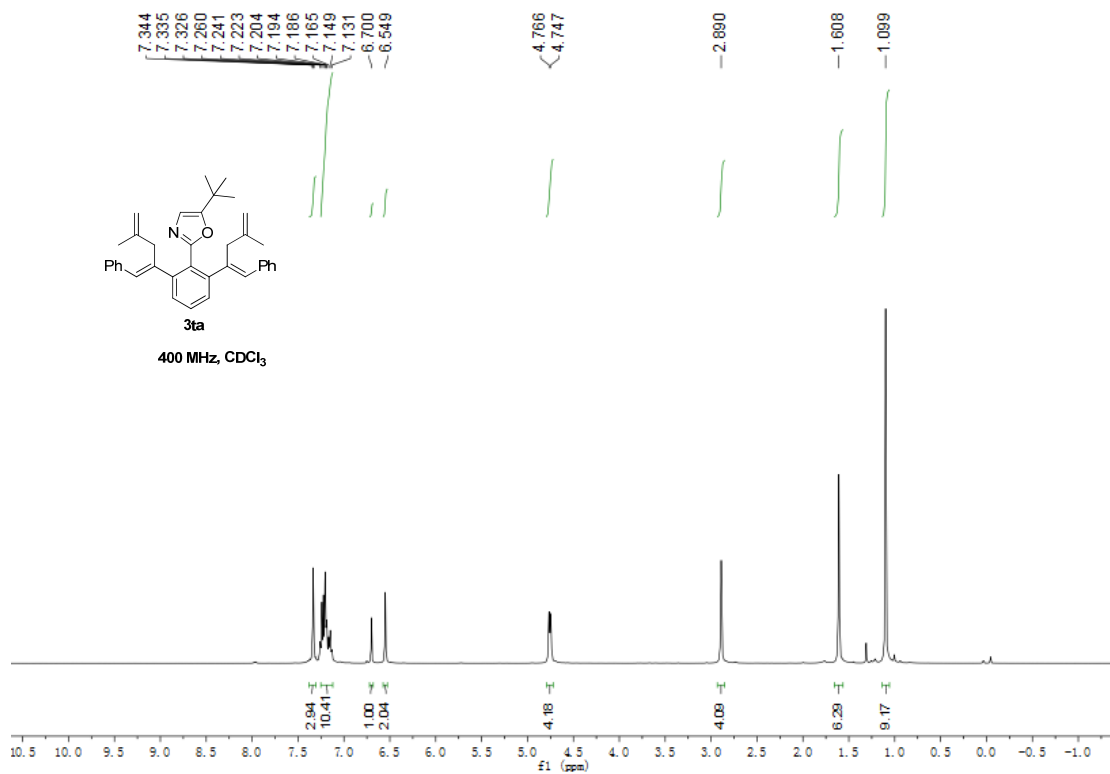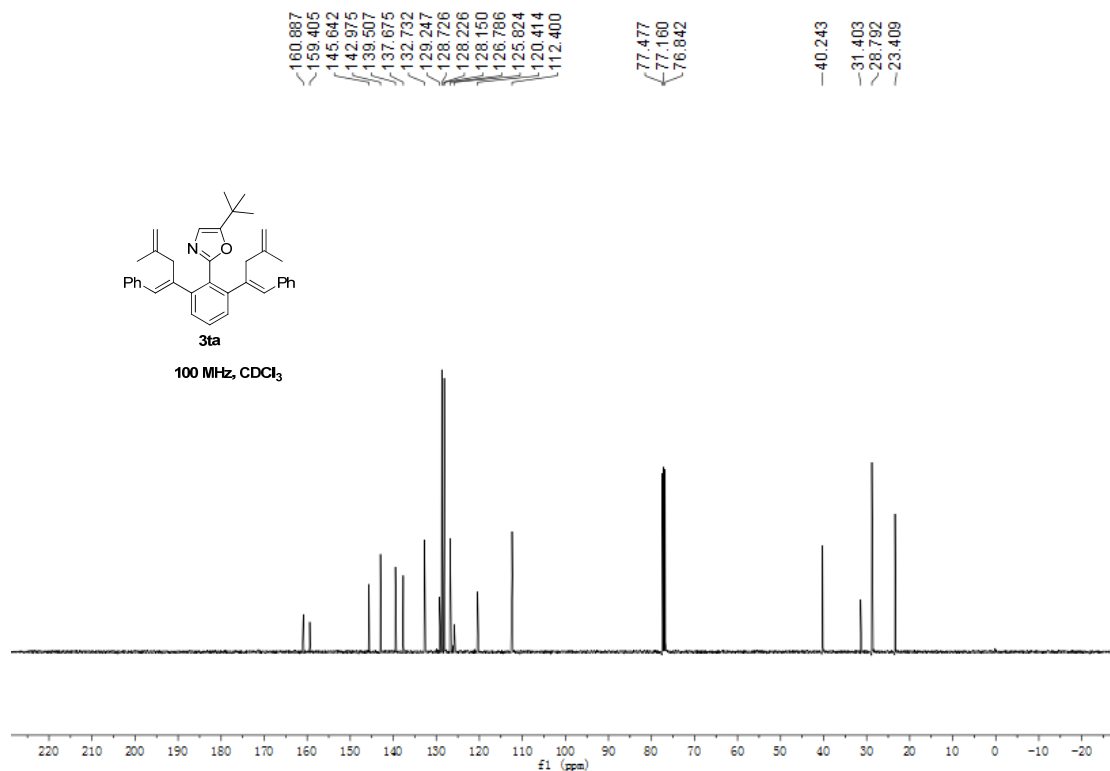



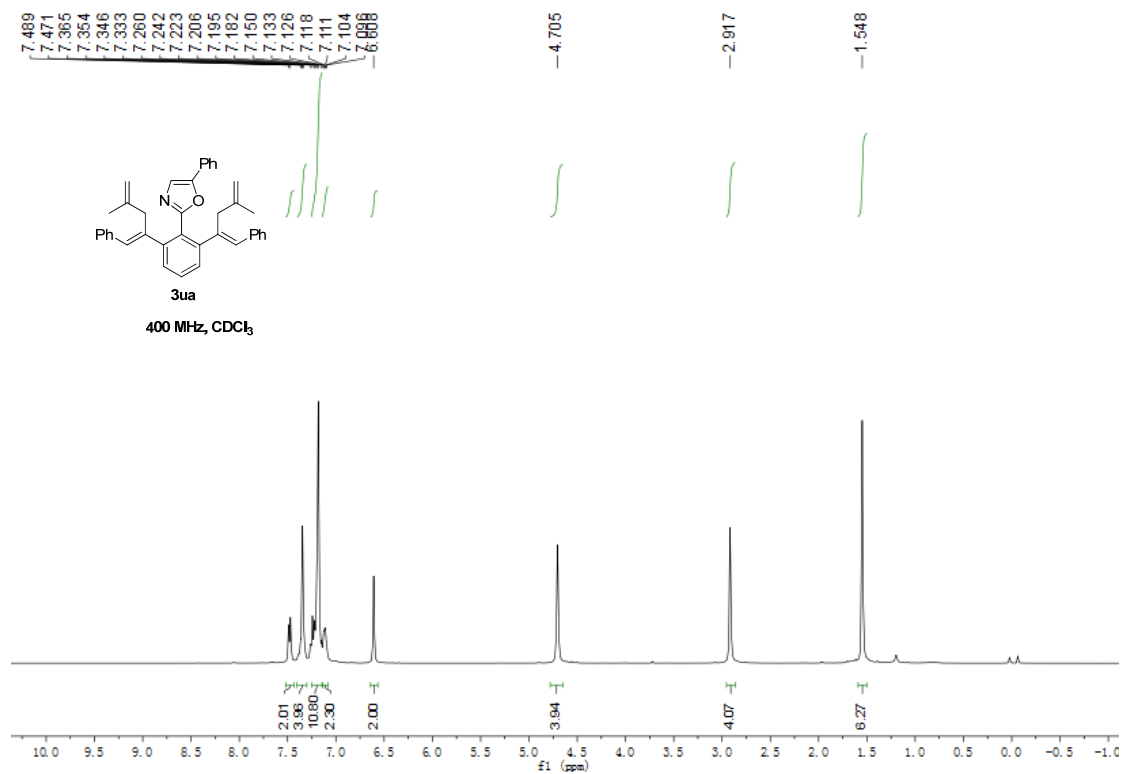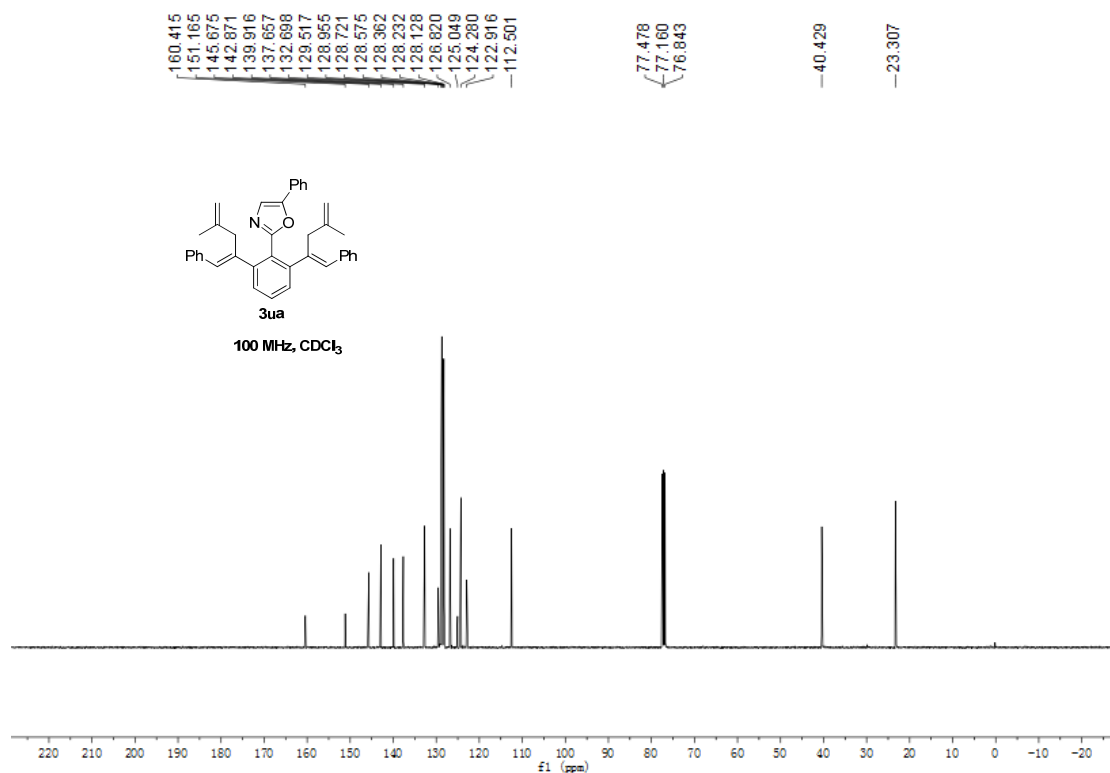

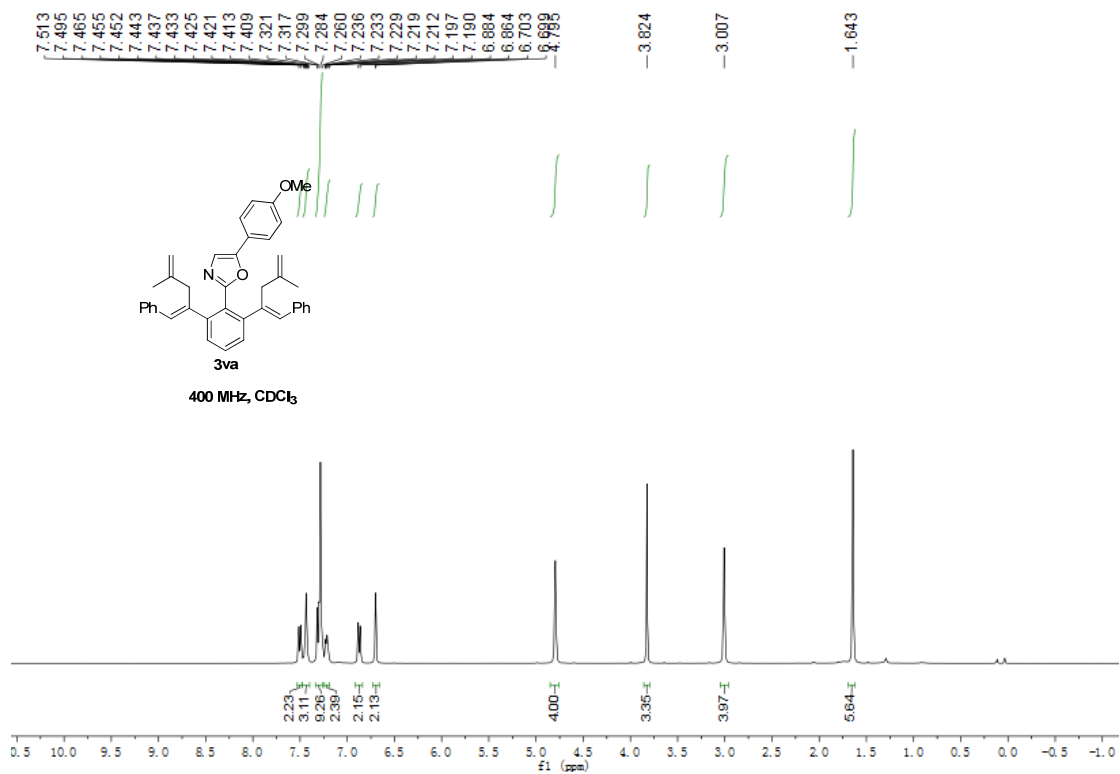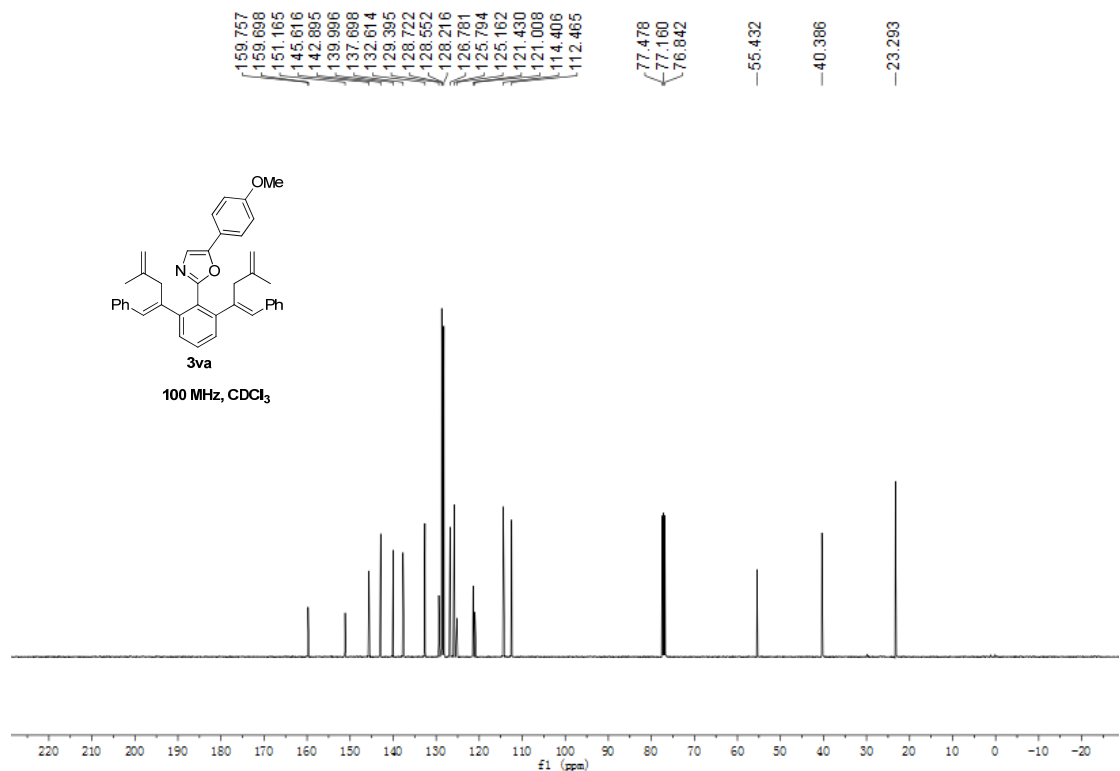

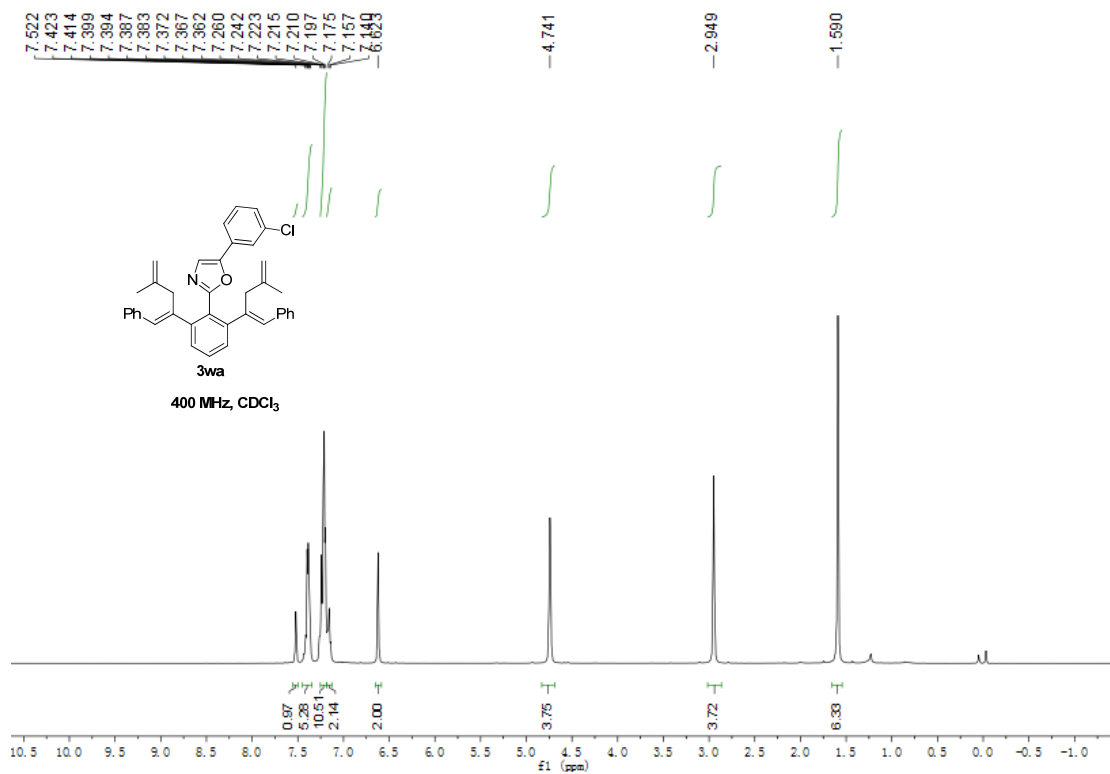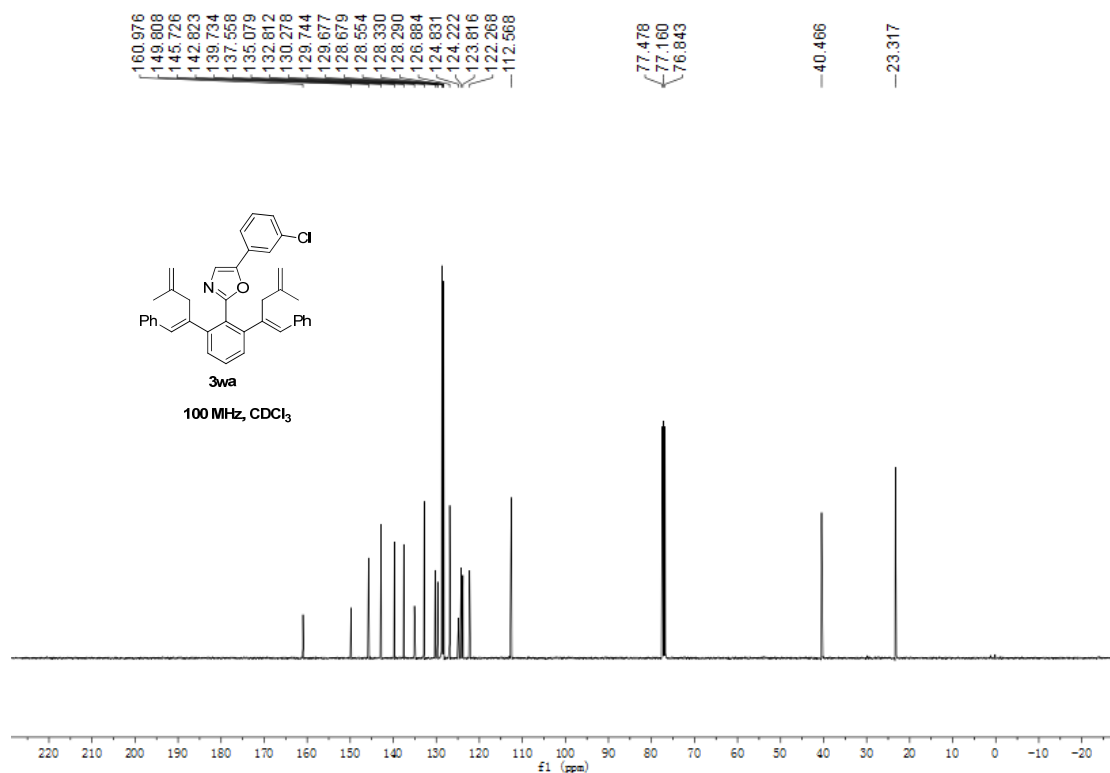

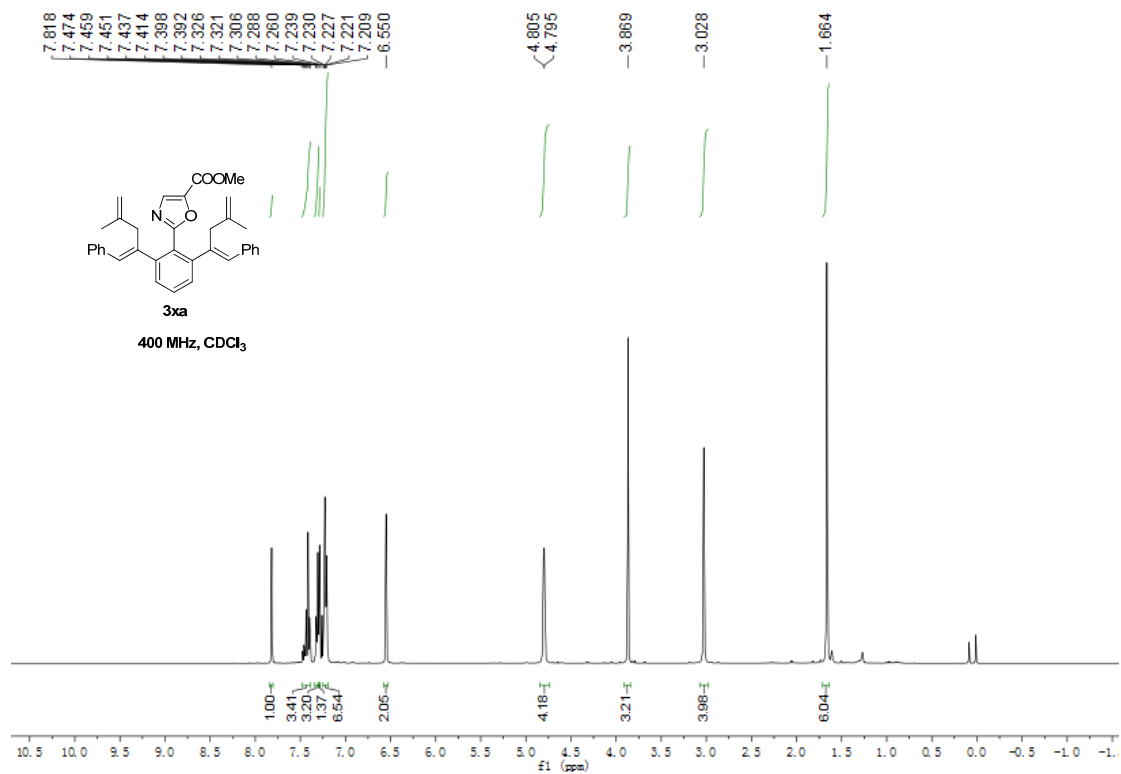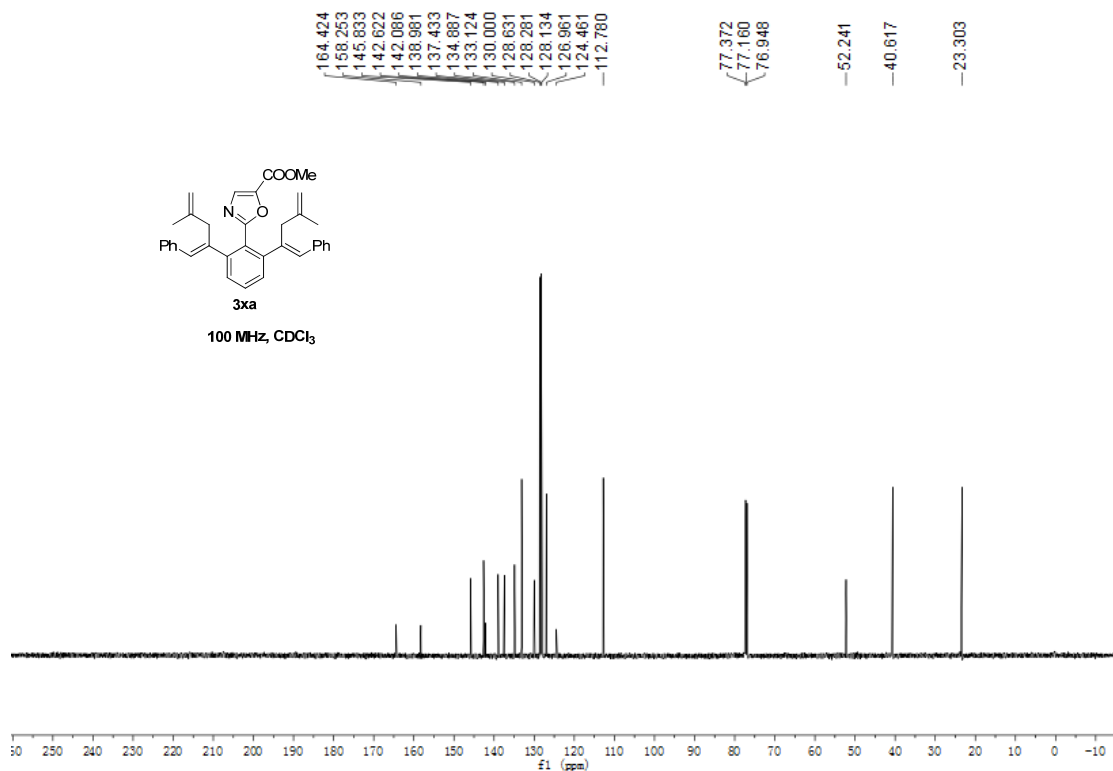

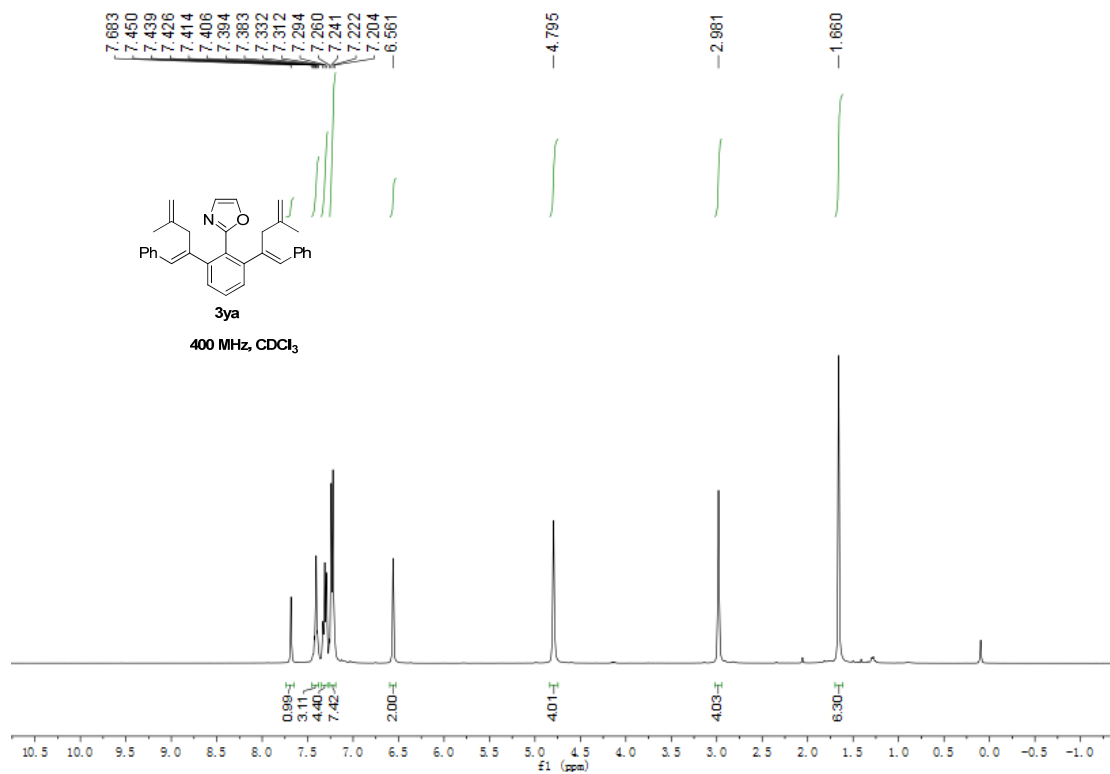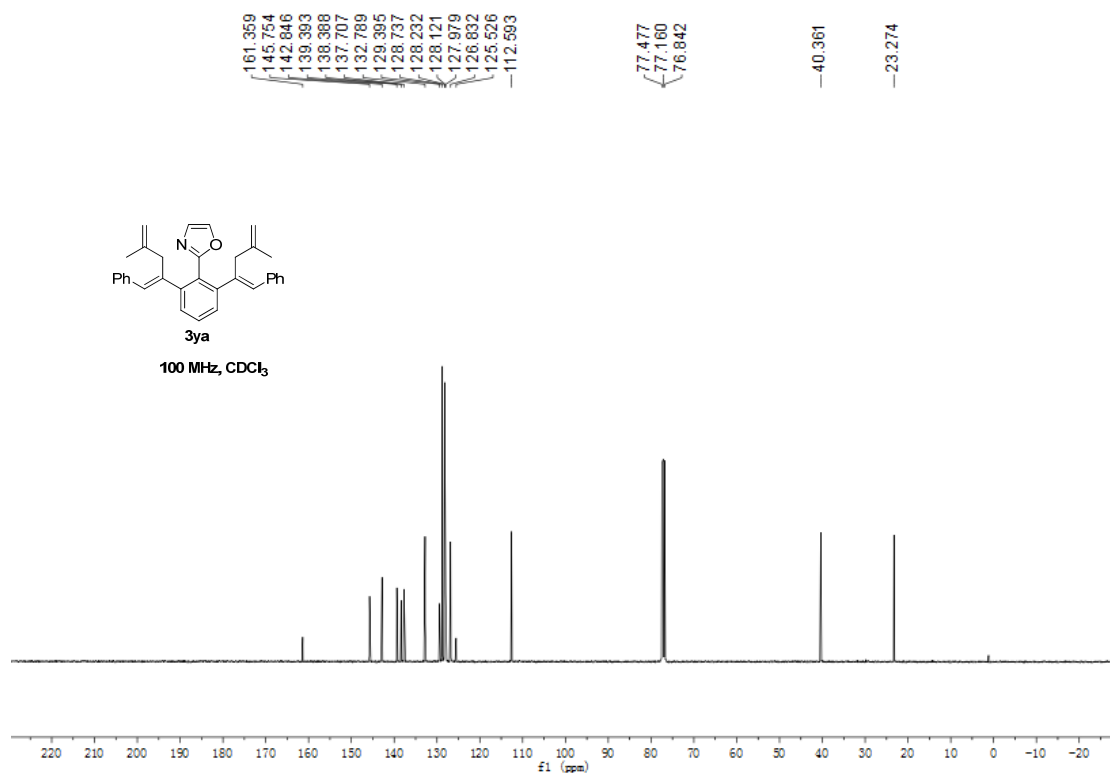

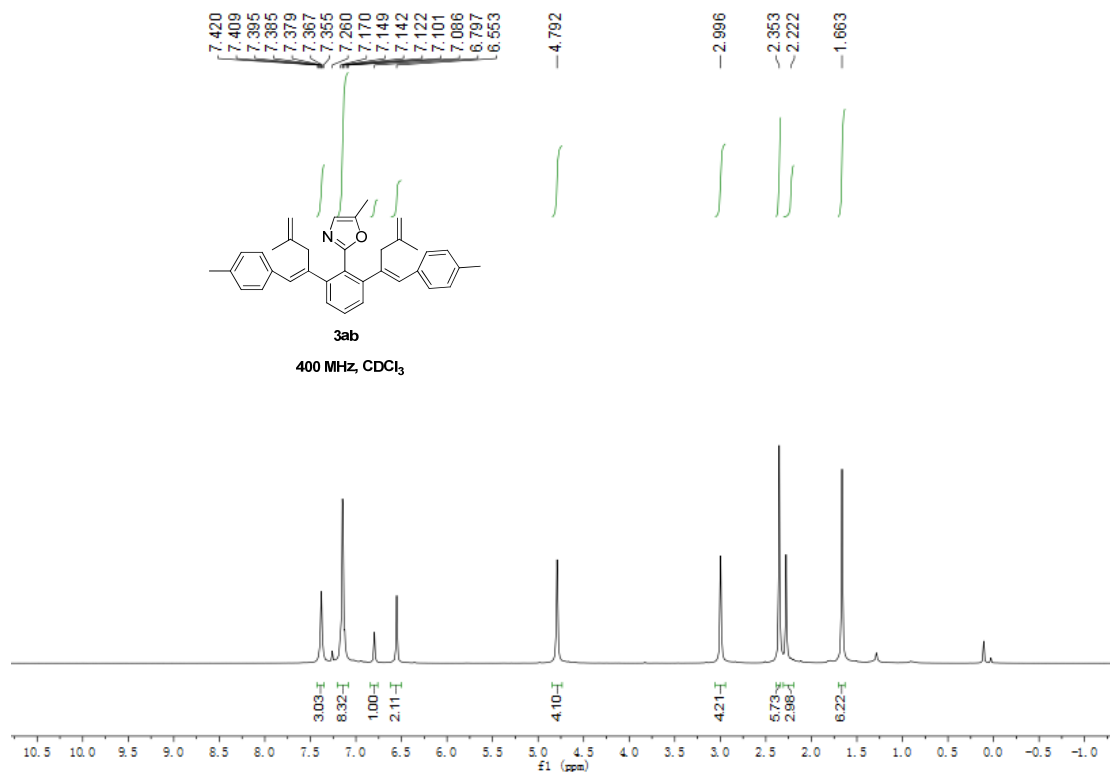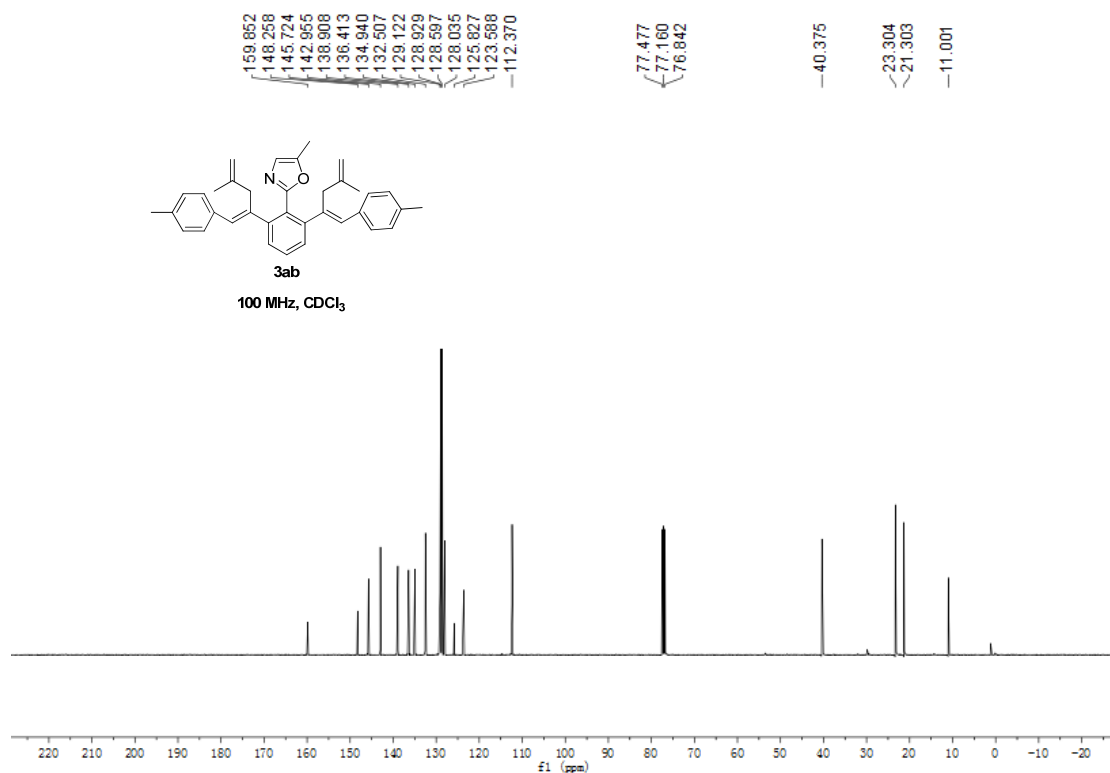

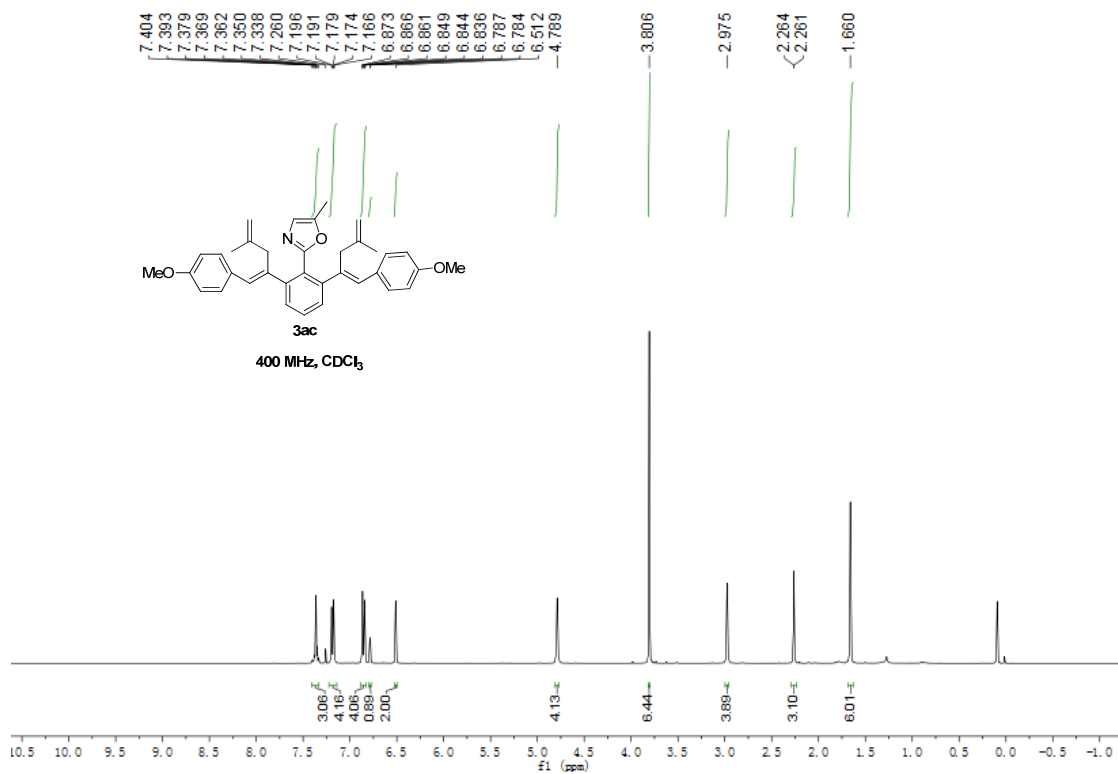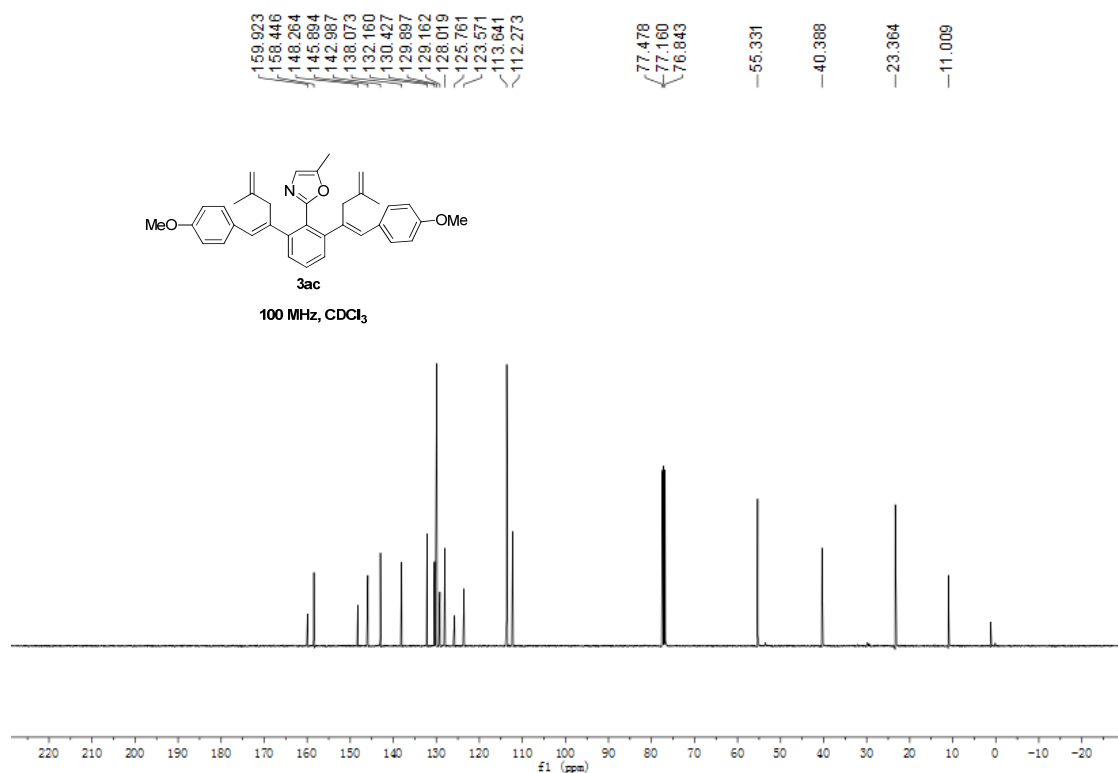





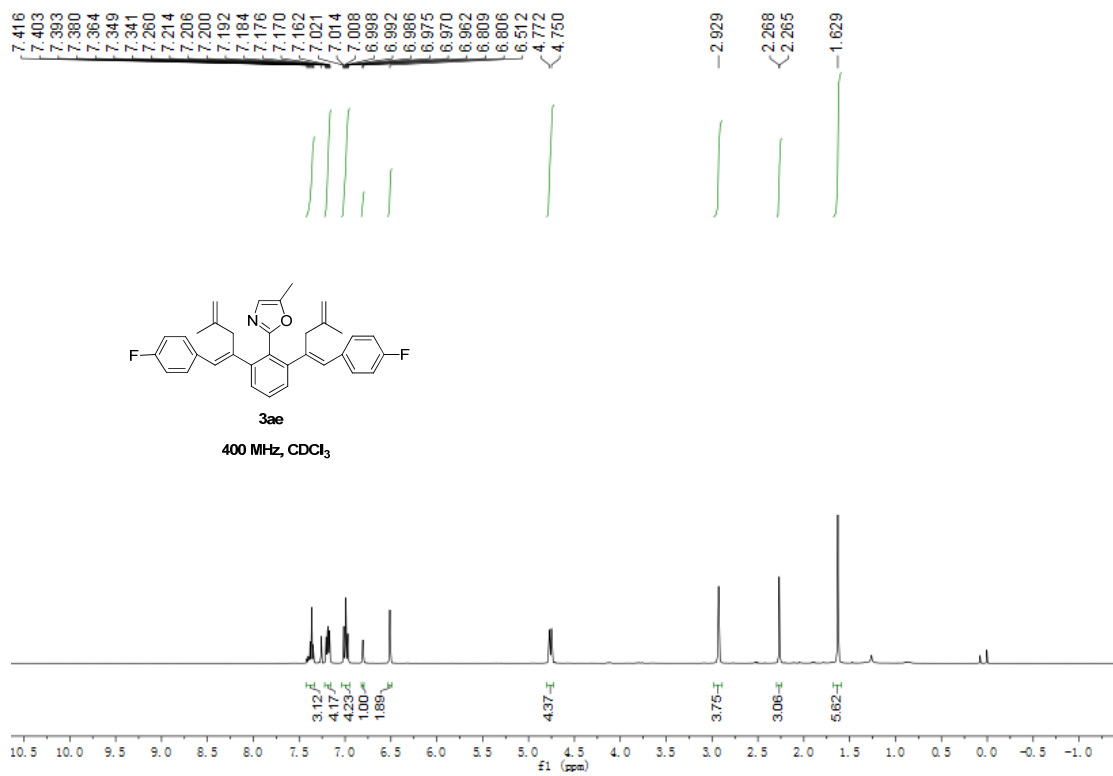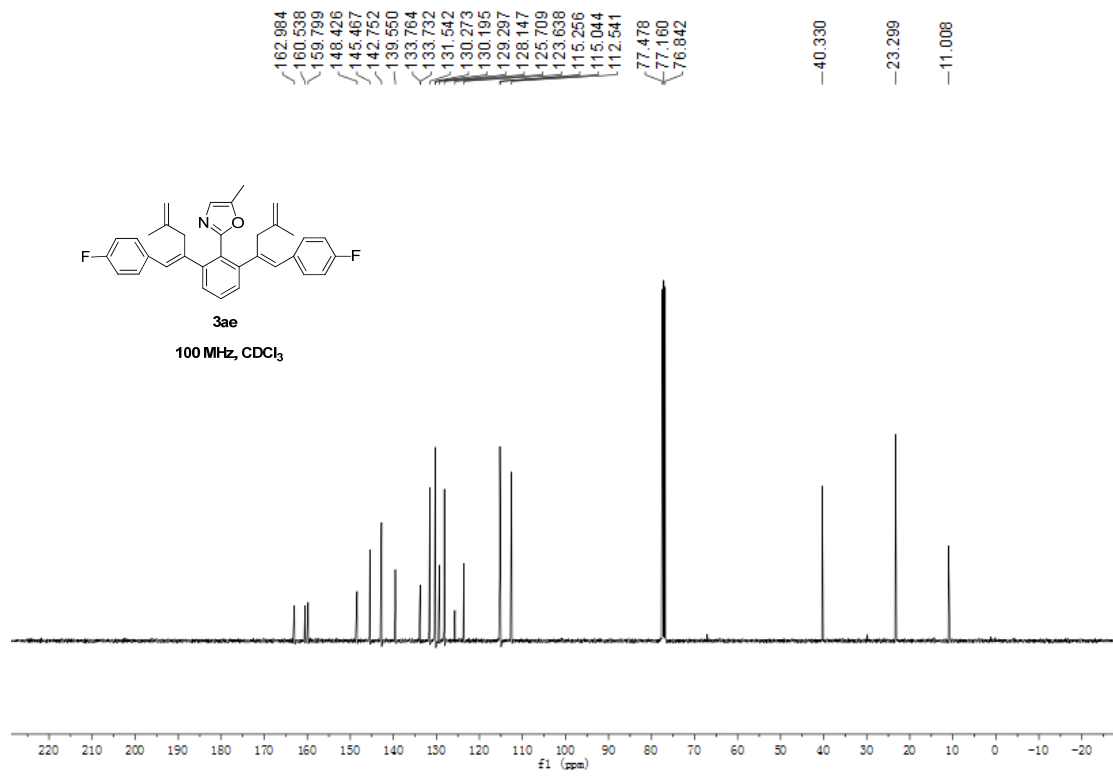

--115.492

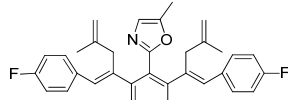

3ae

376 MHz, CDCl<sub>3</sub>

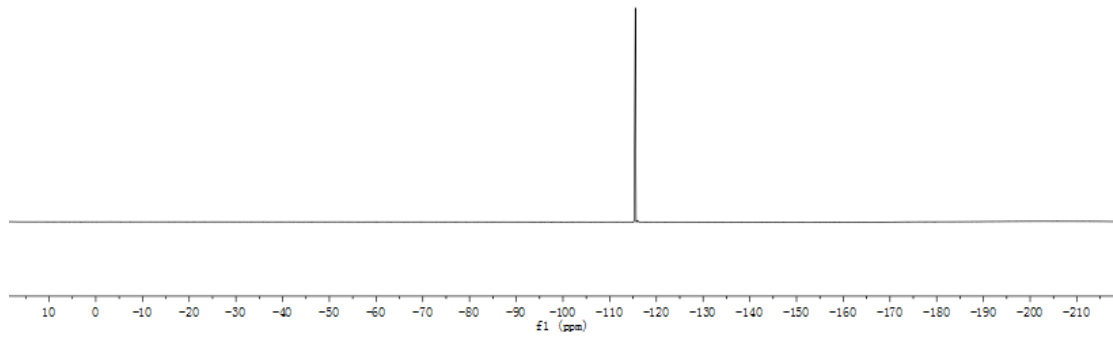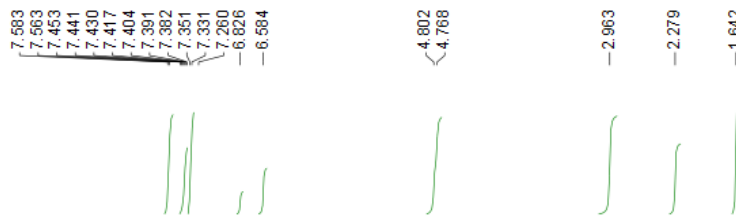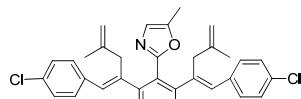

3af

400 MHz, CDCl<sub>3</sub>

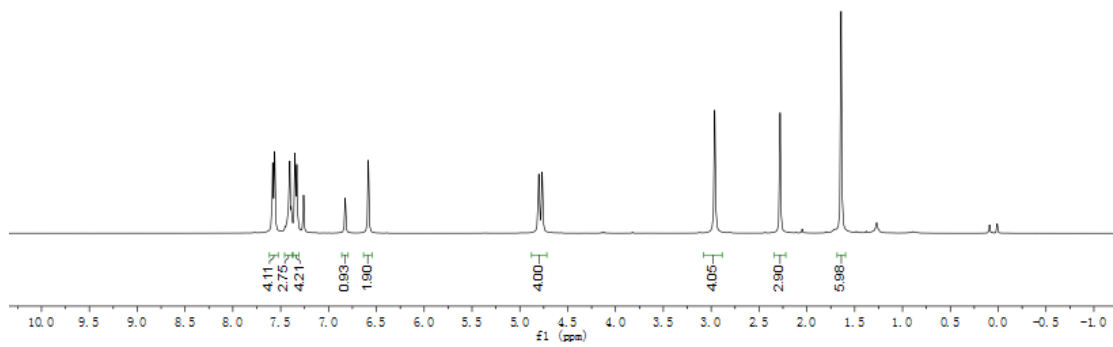

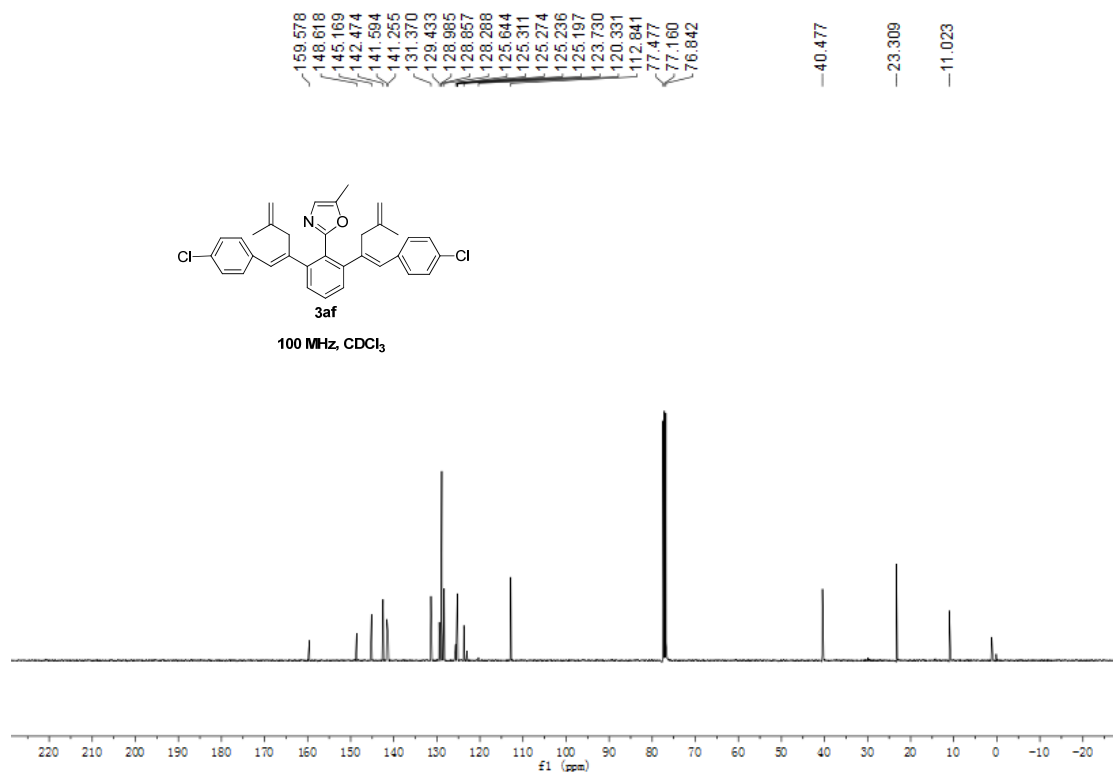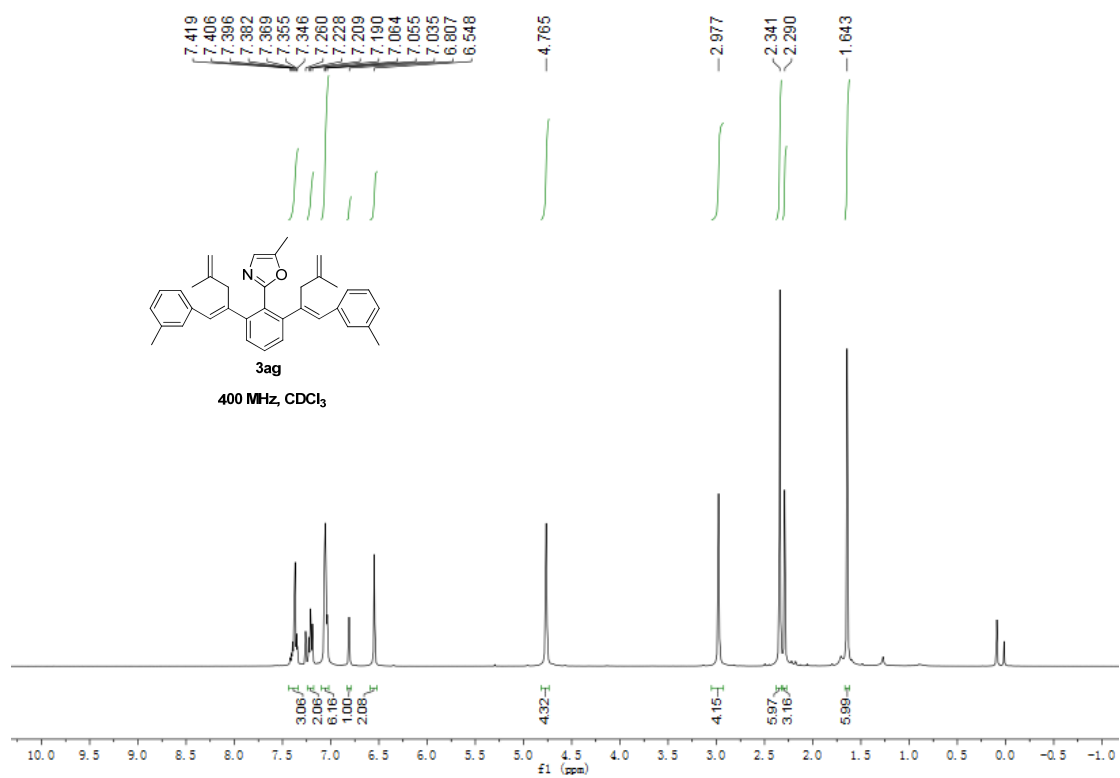

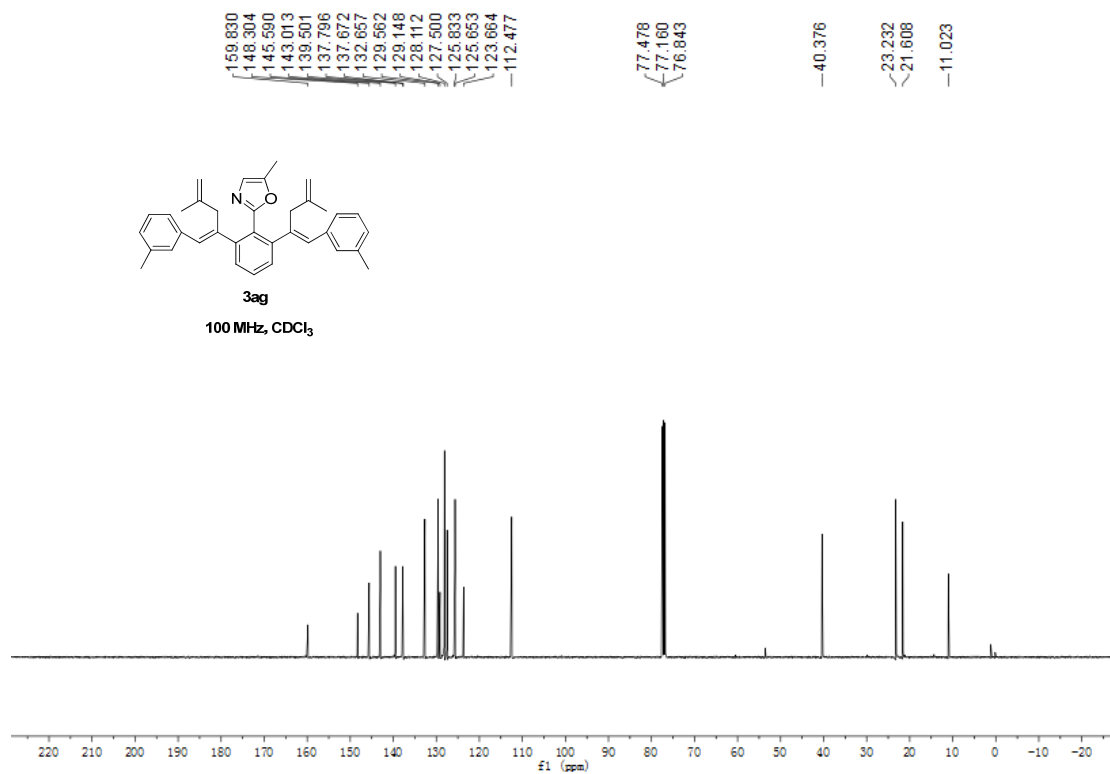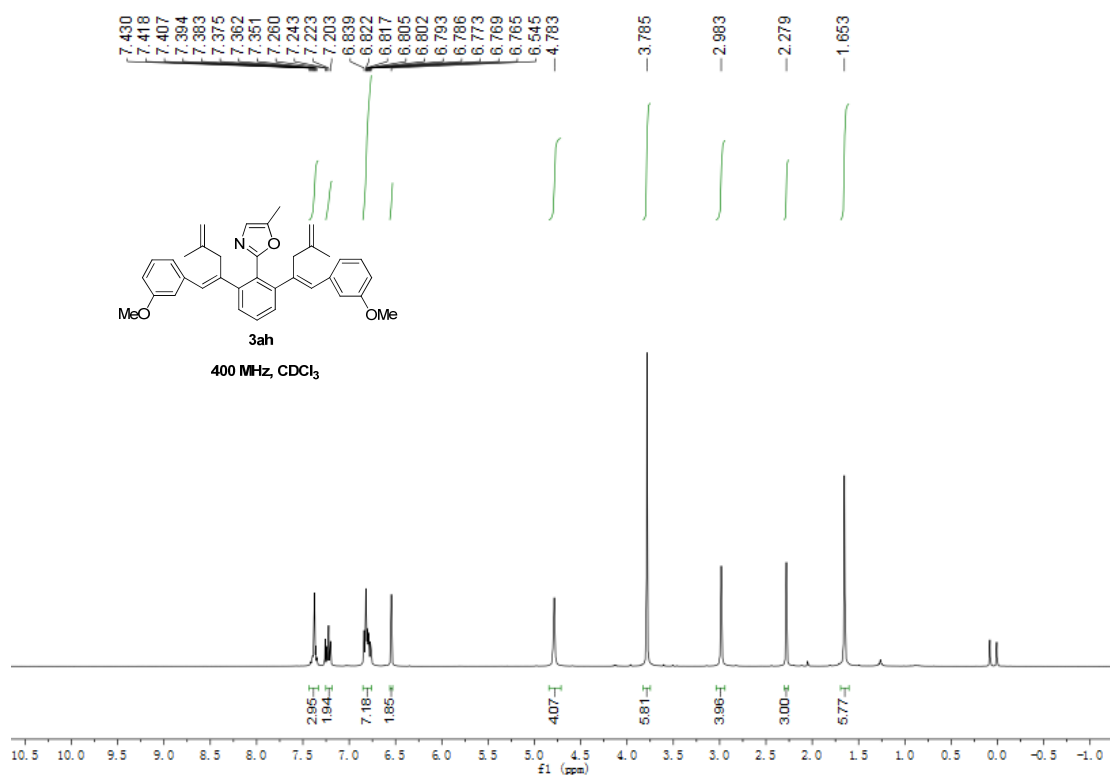

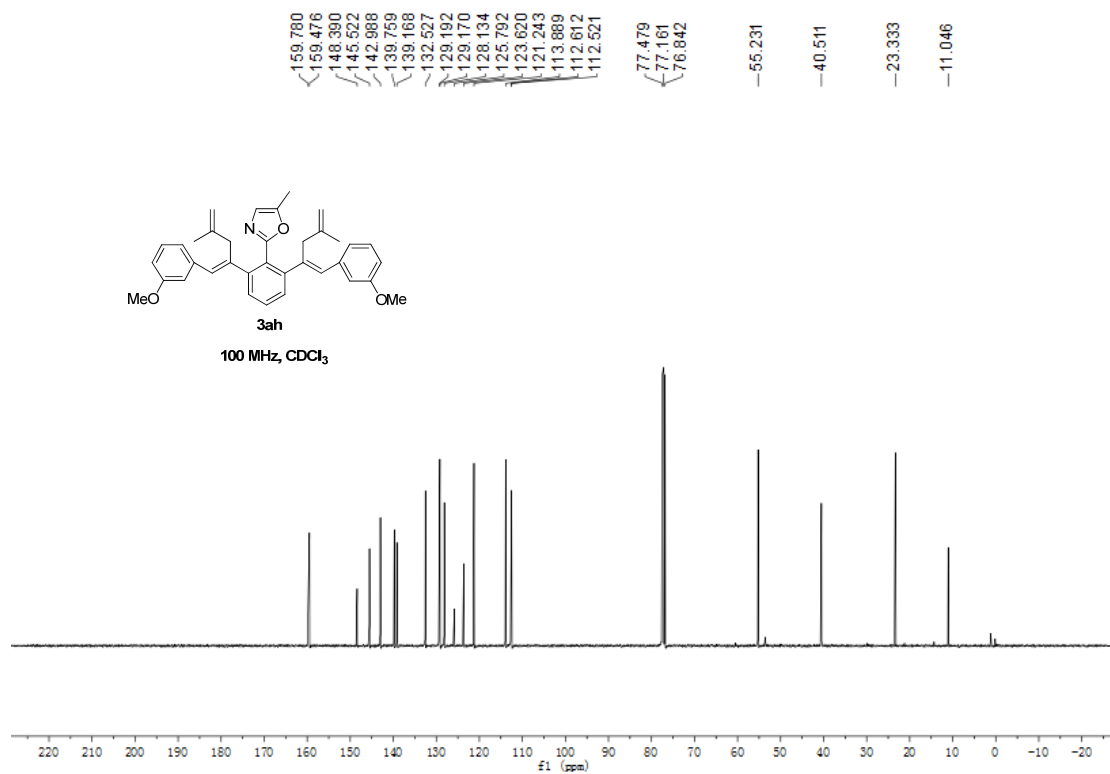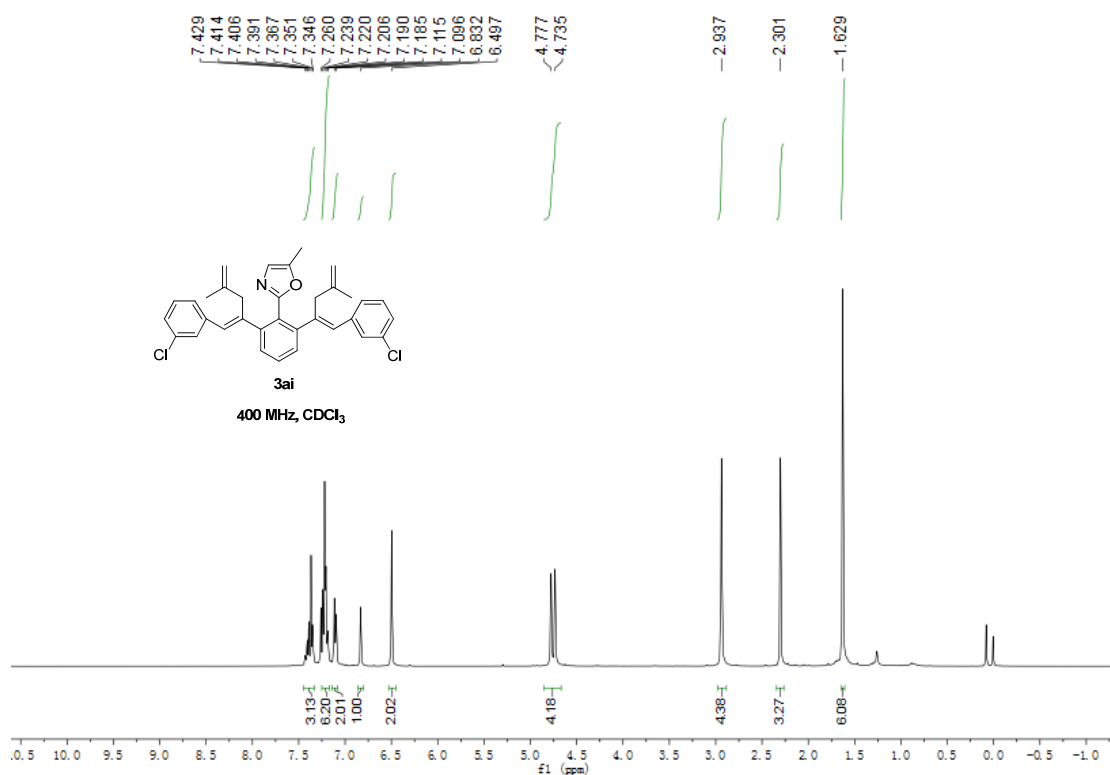

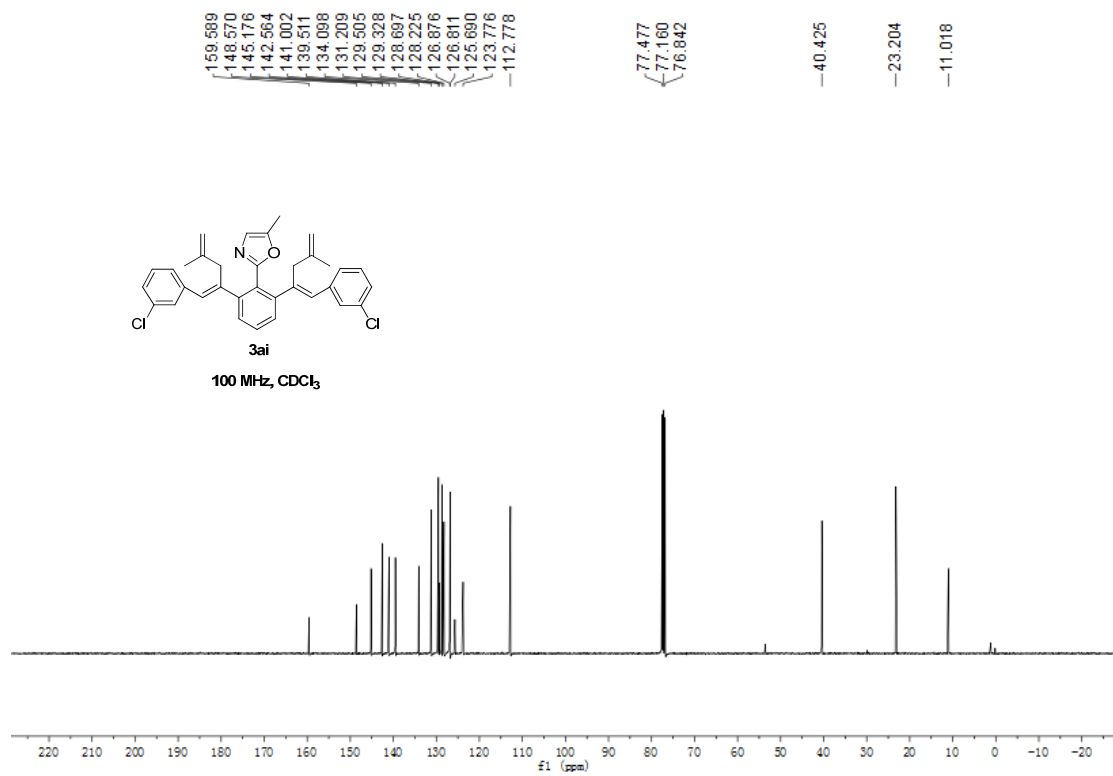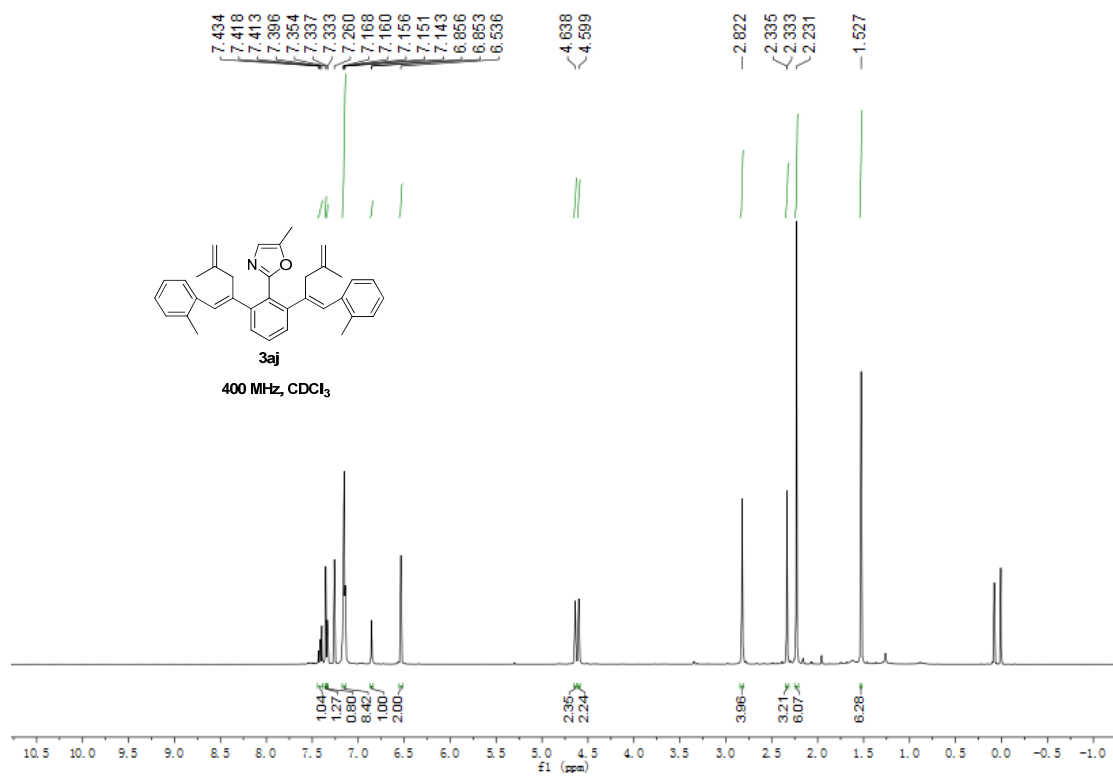

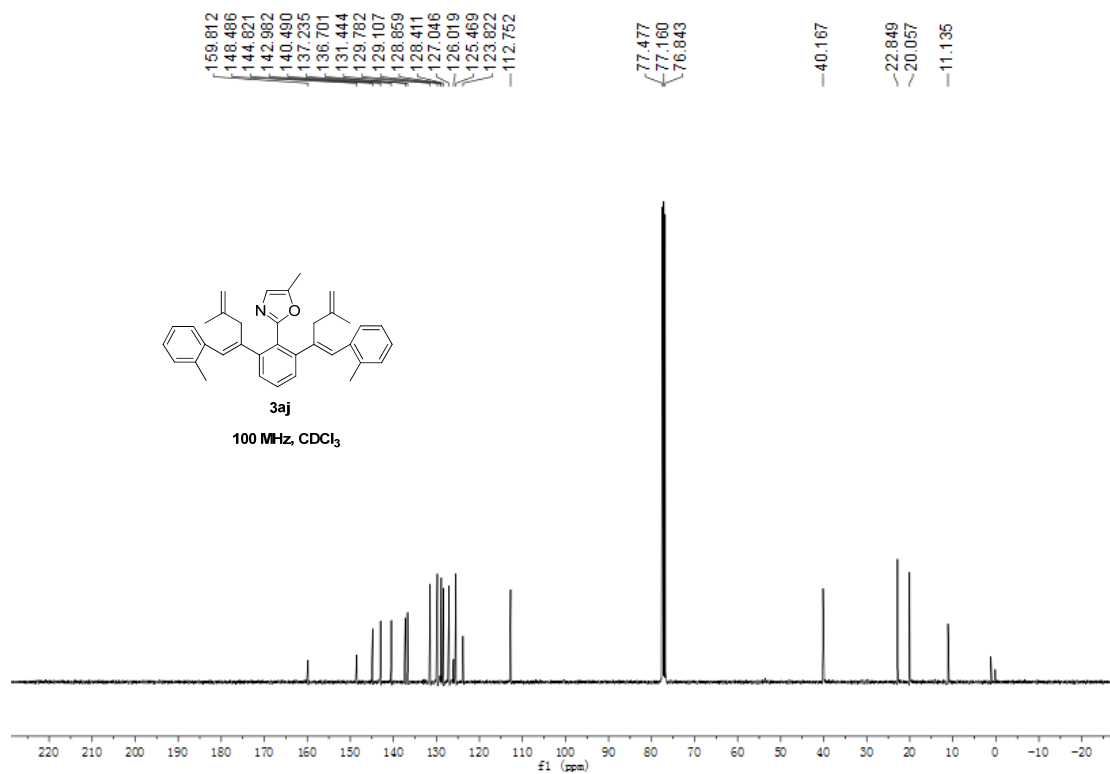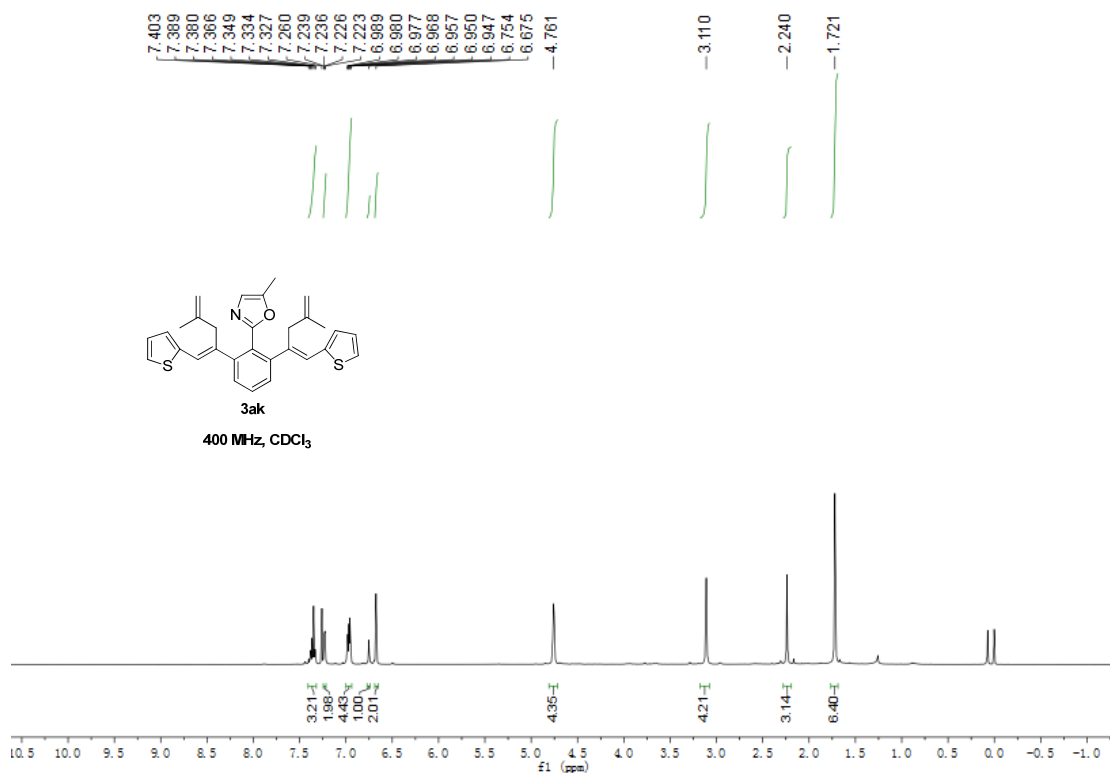

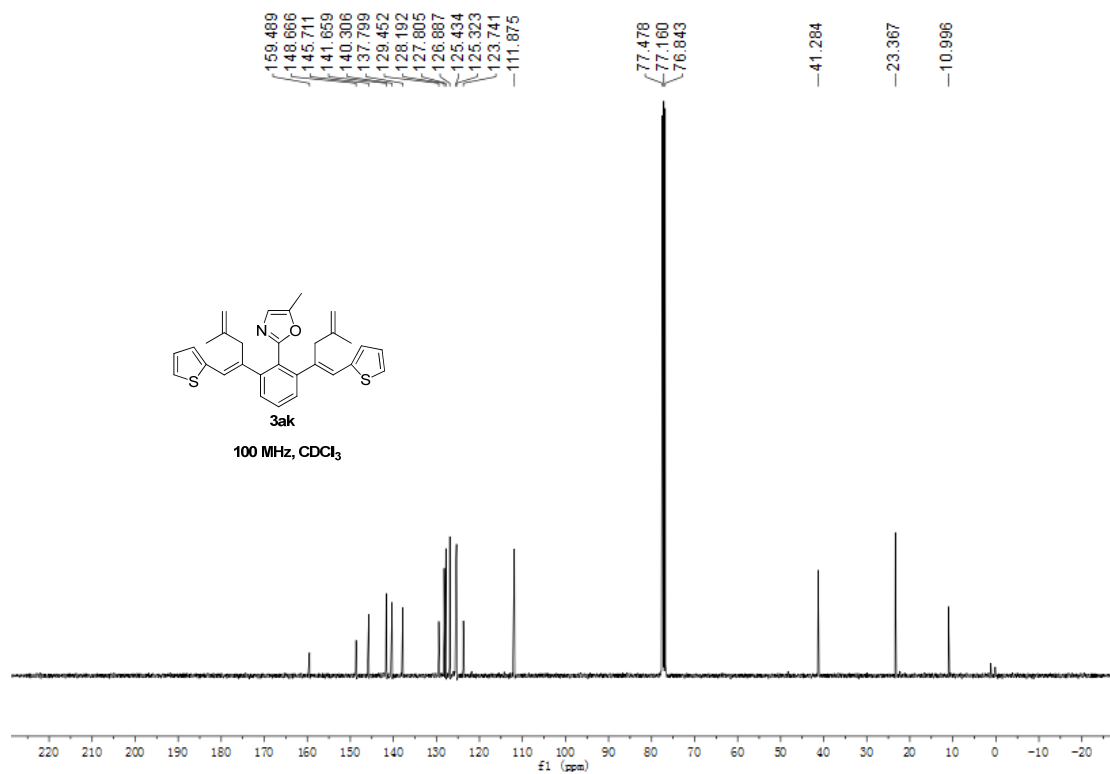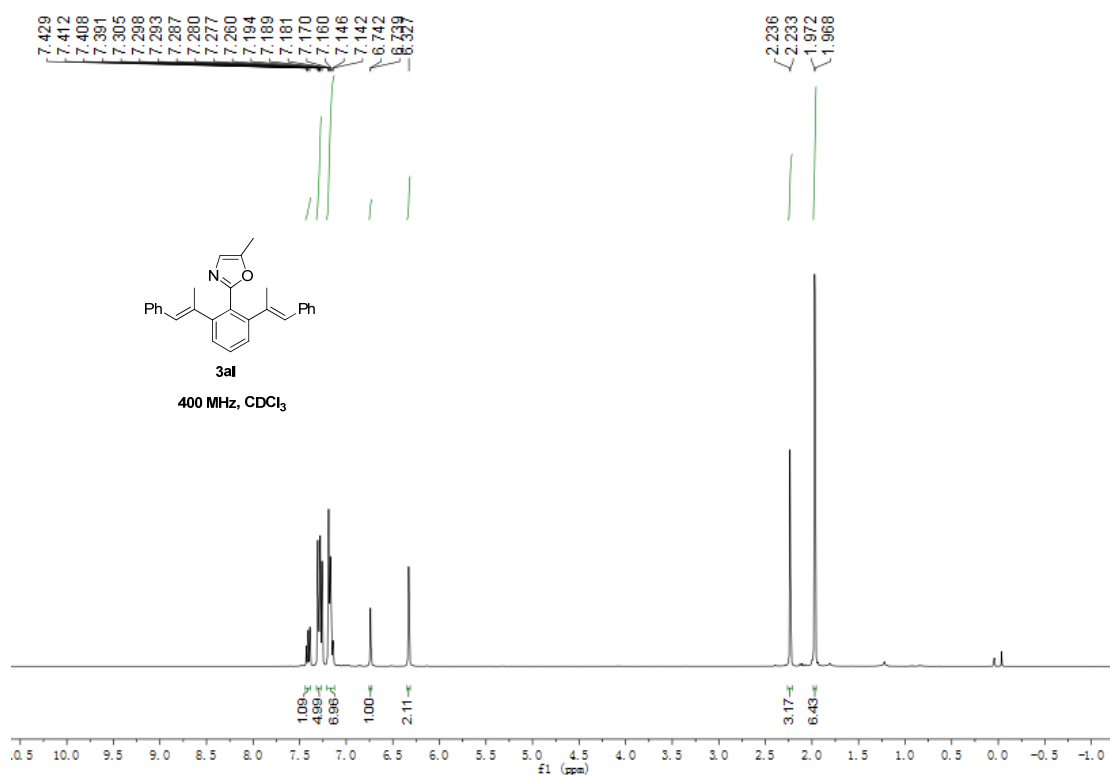



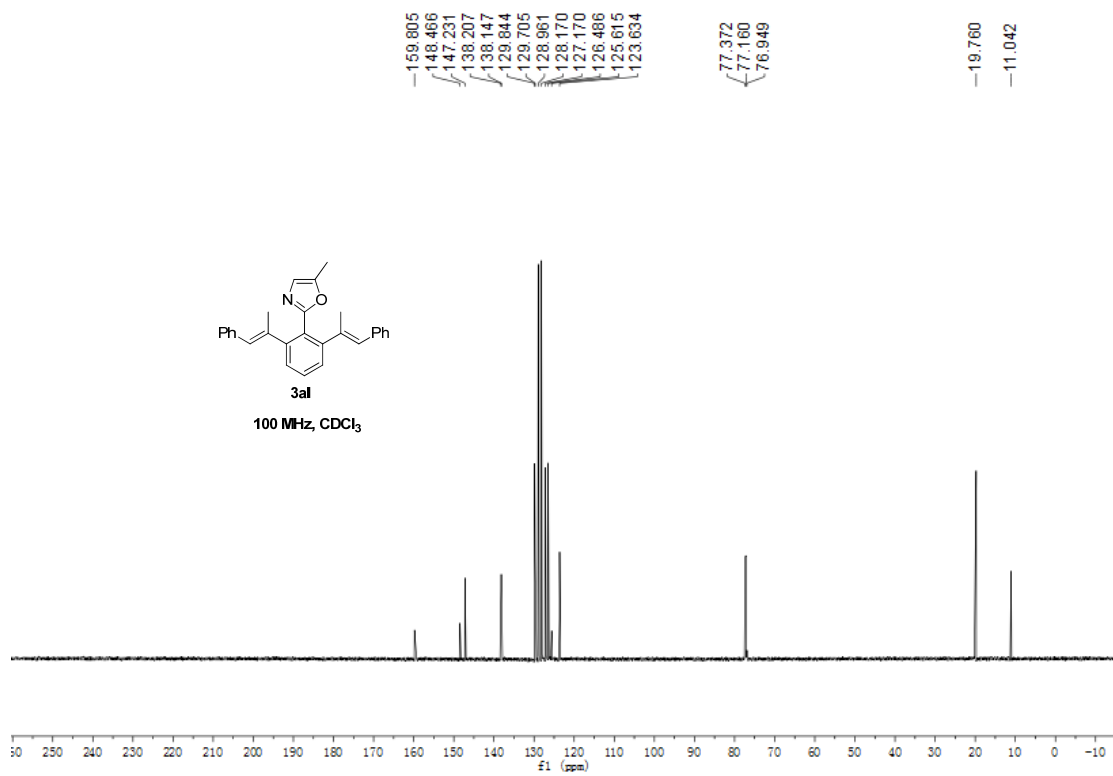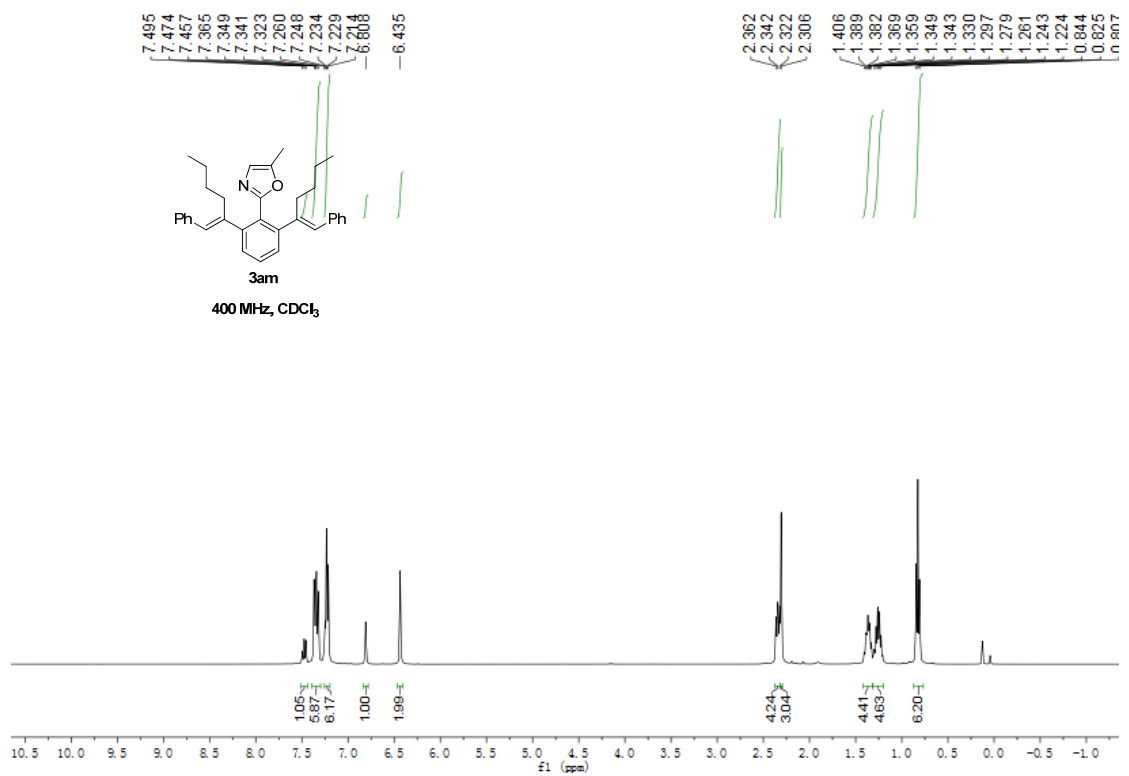

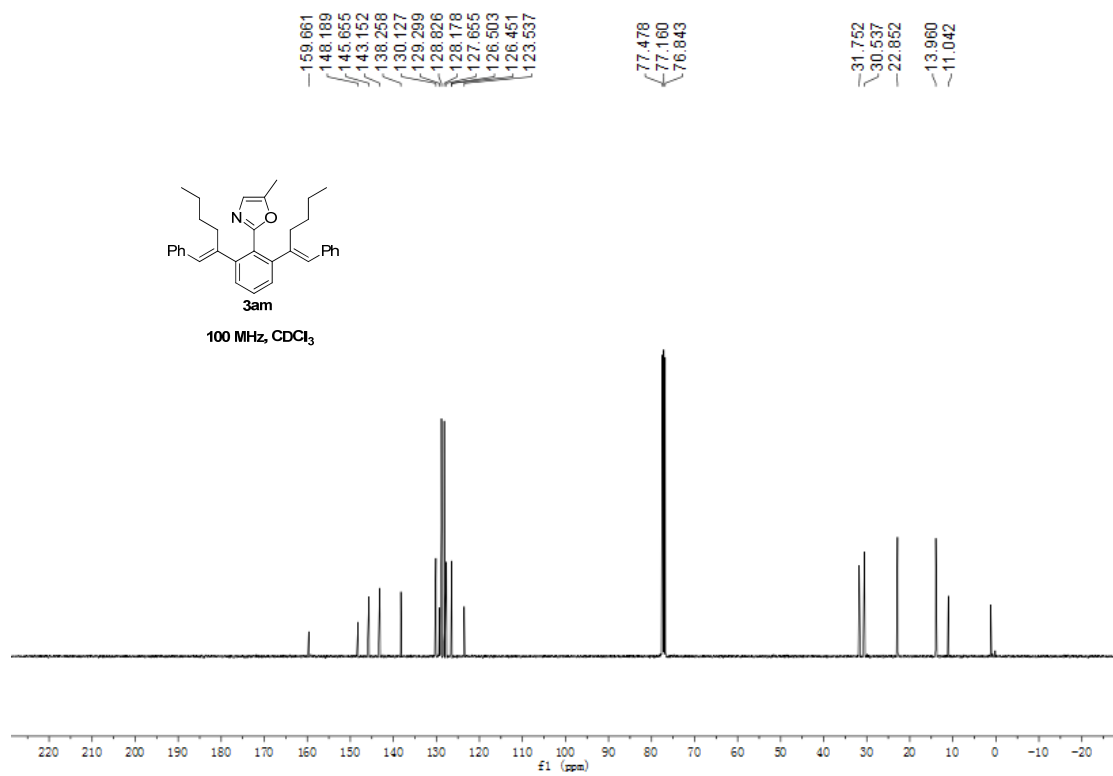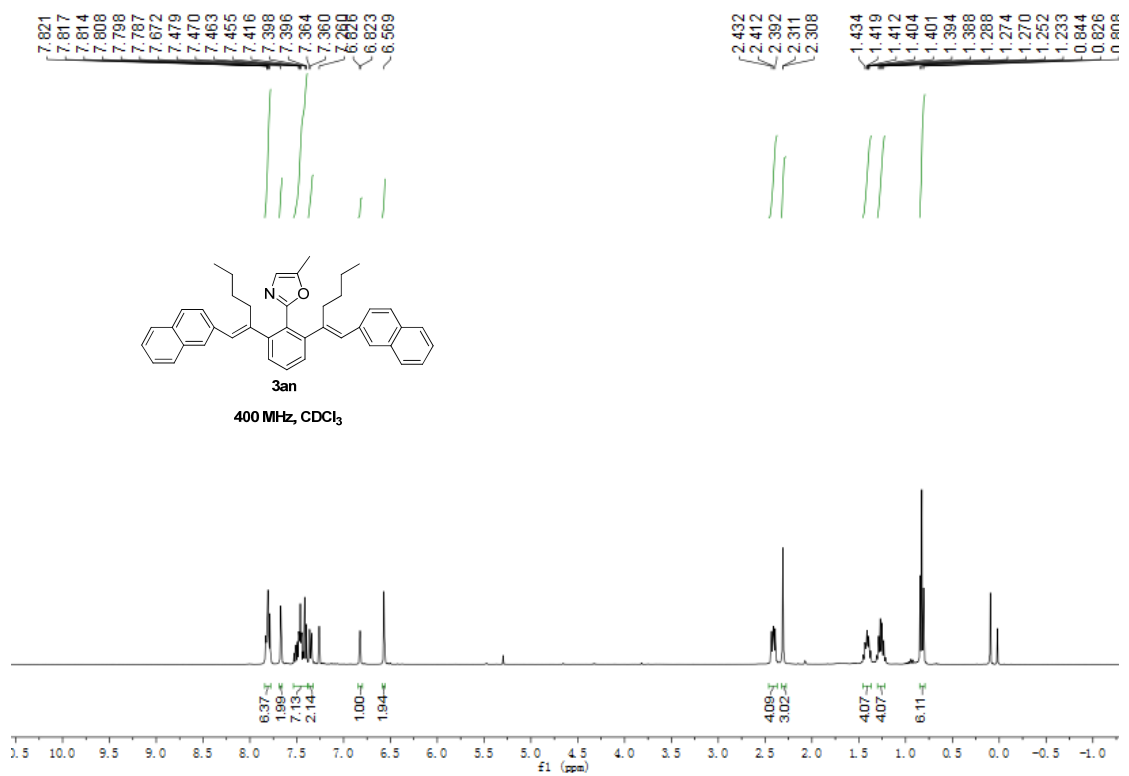

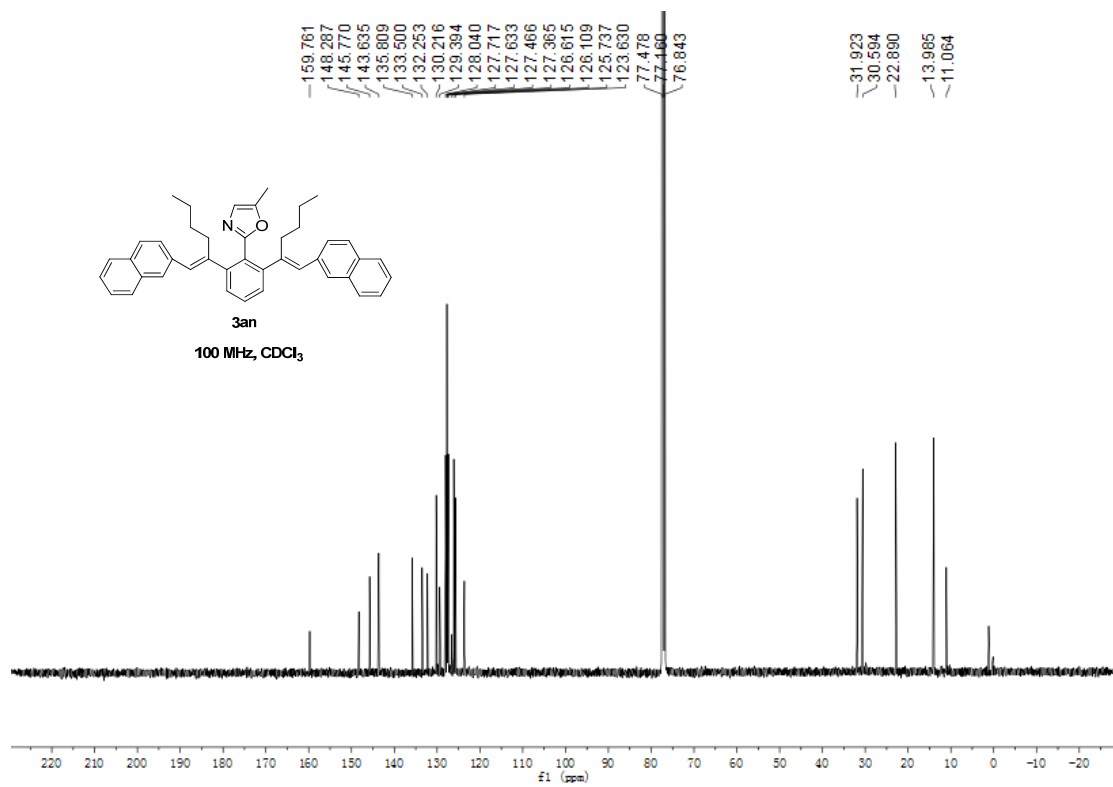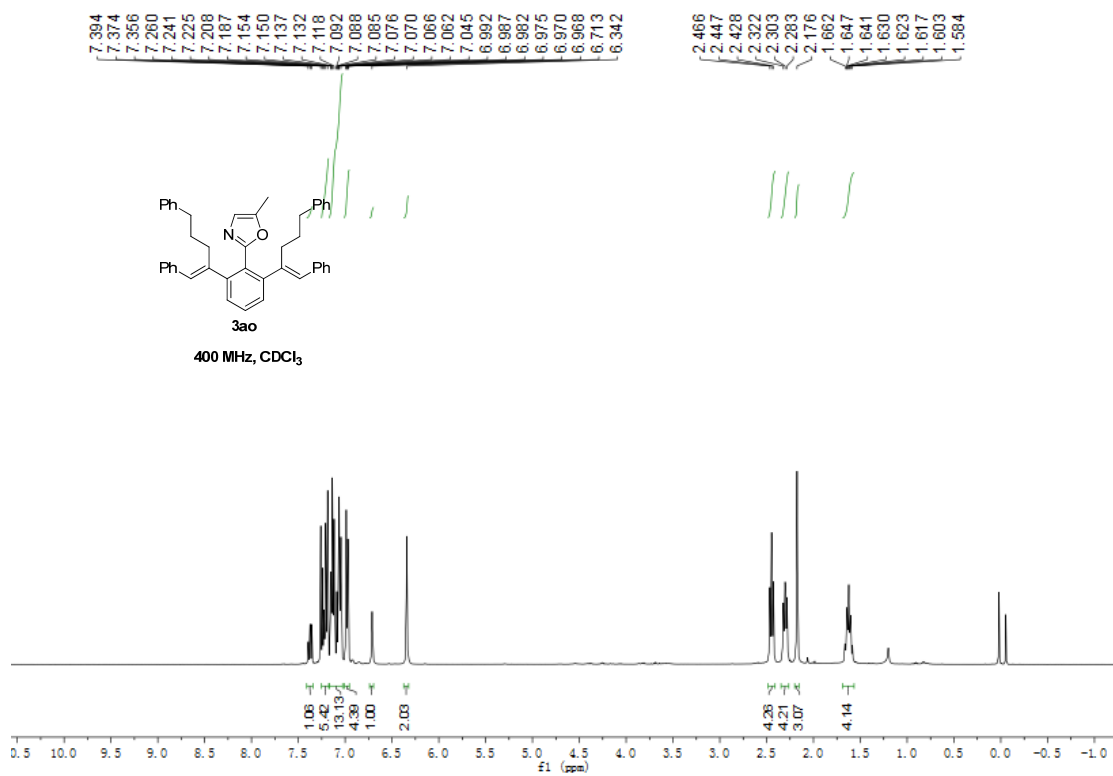

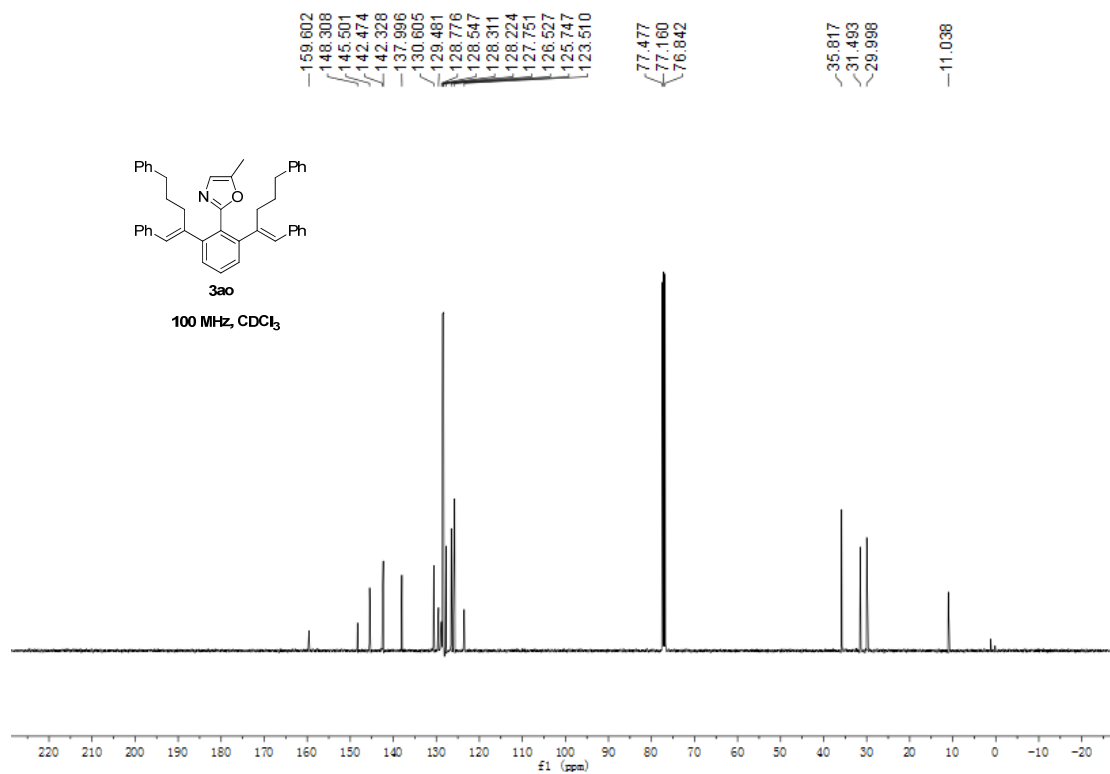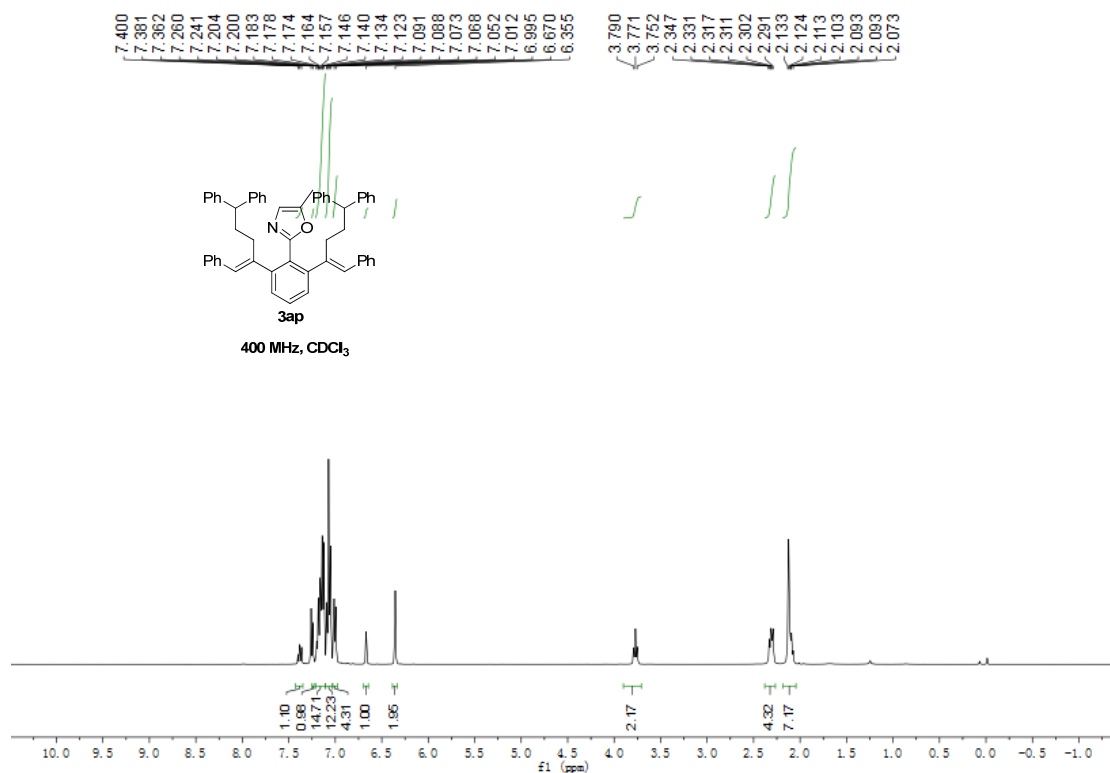

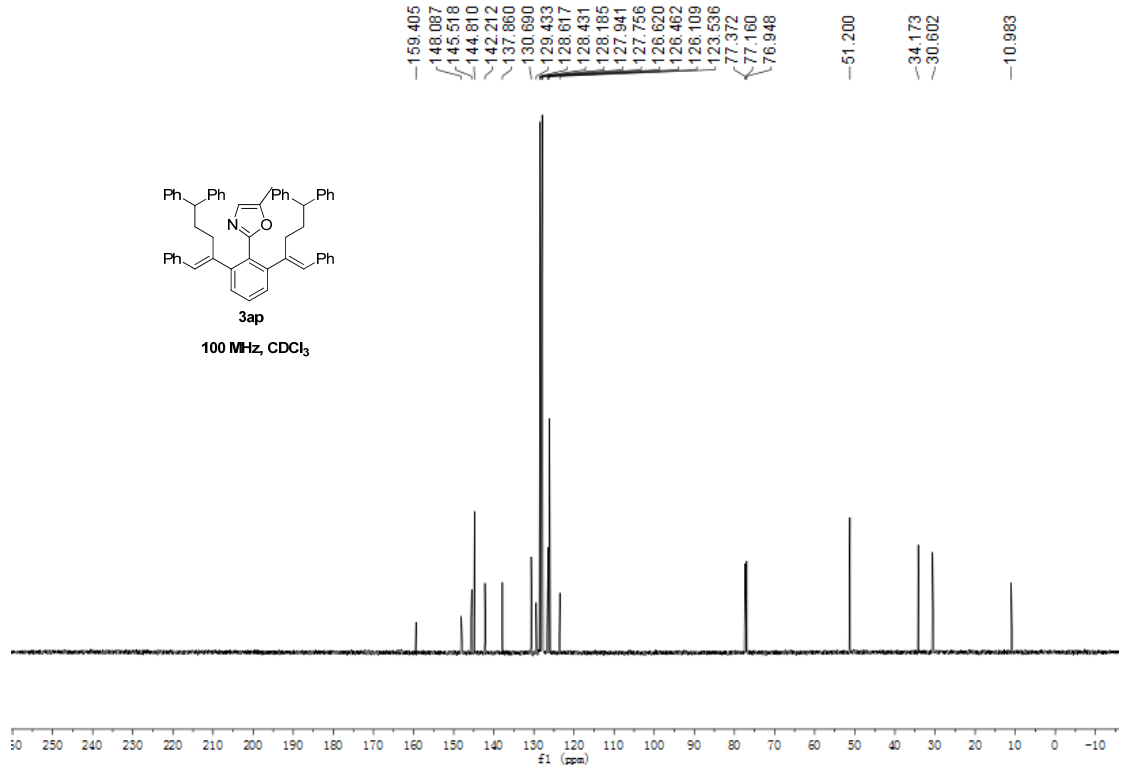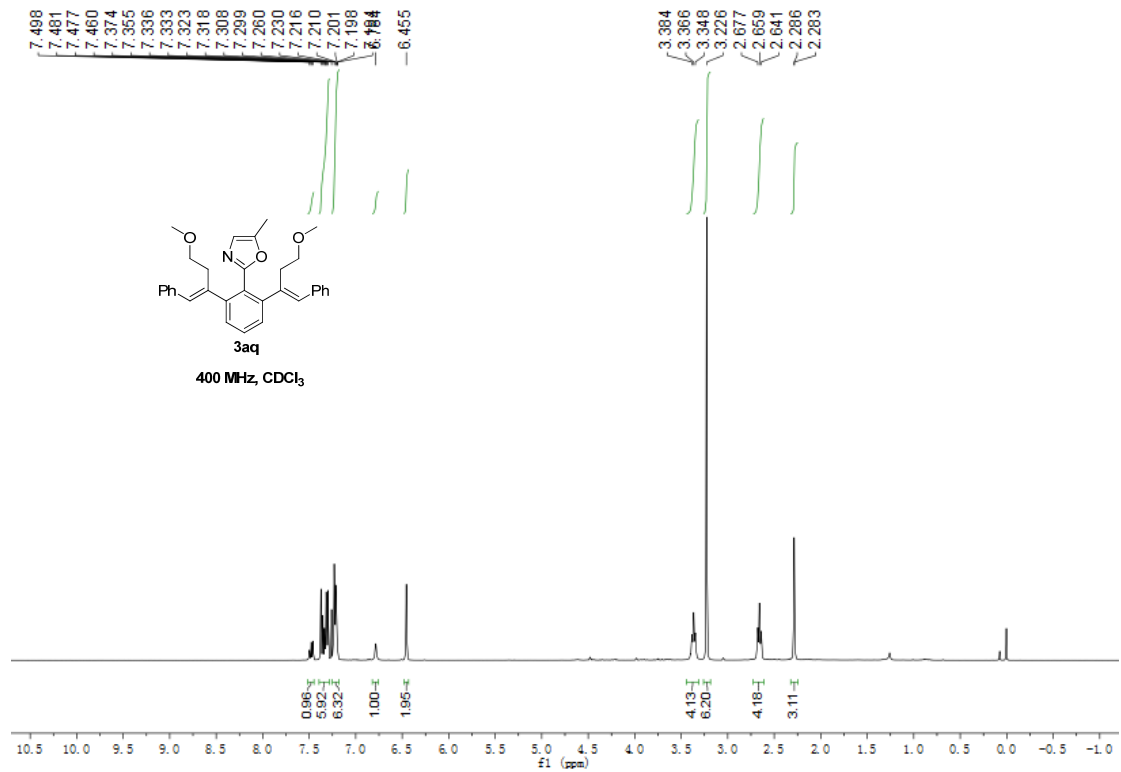

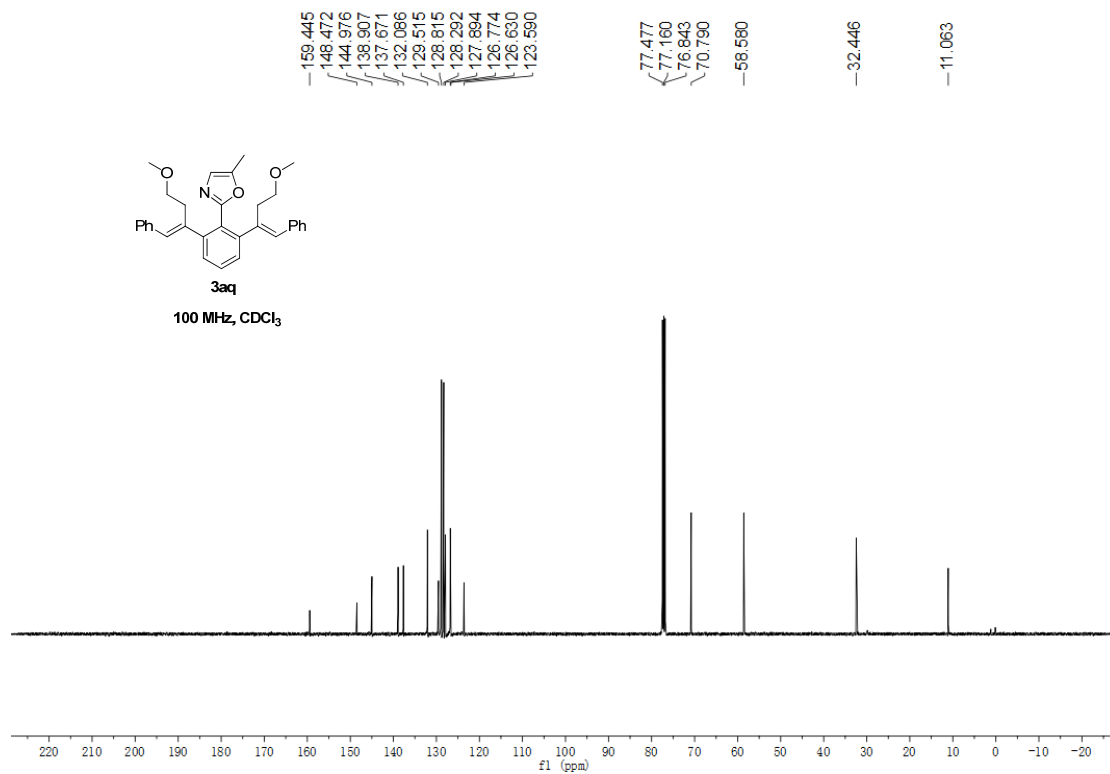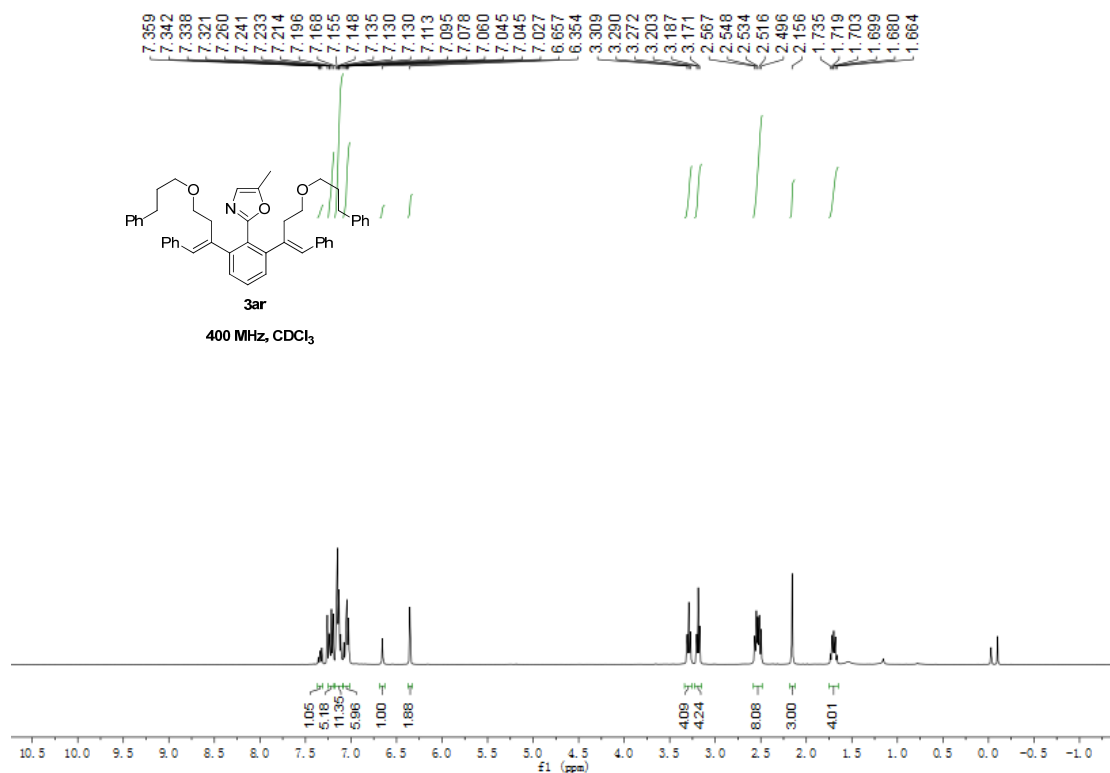

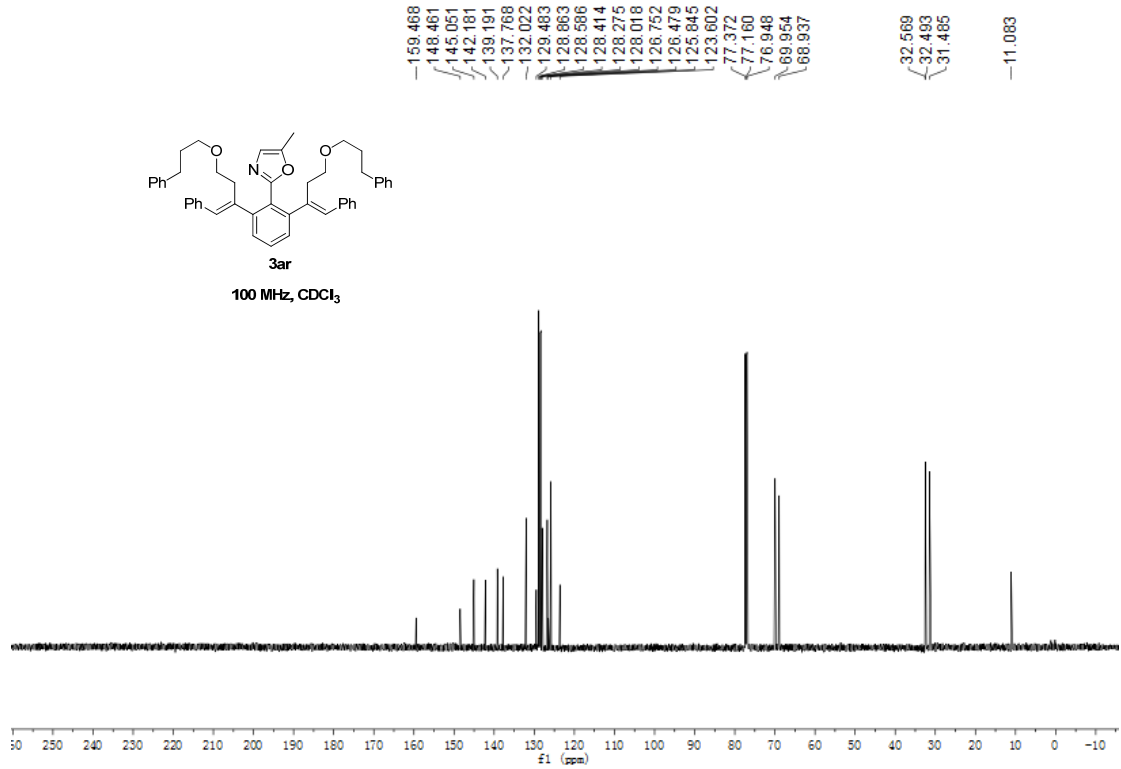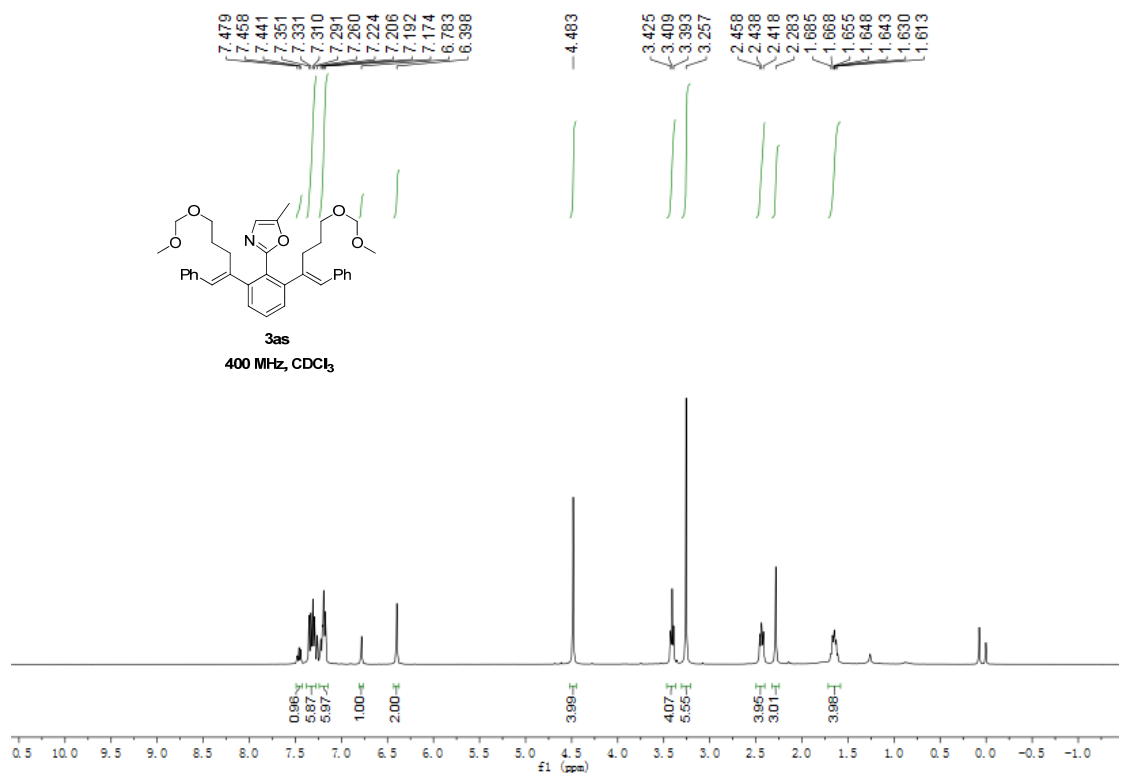

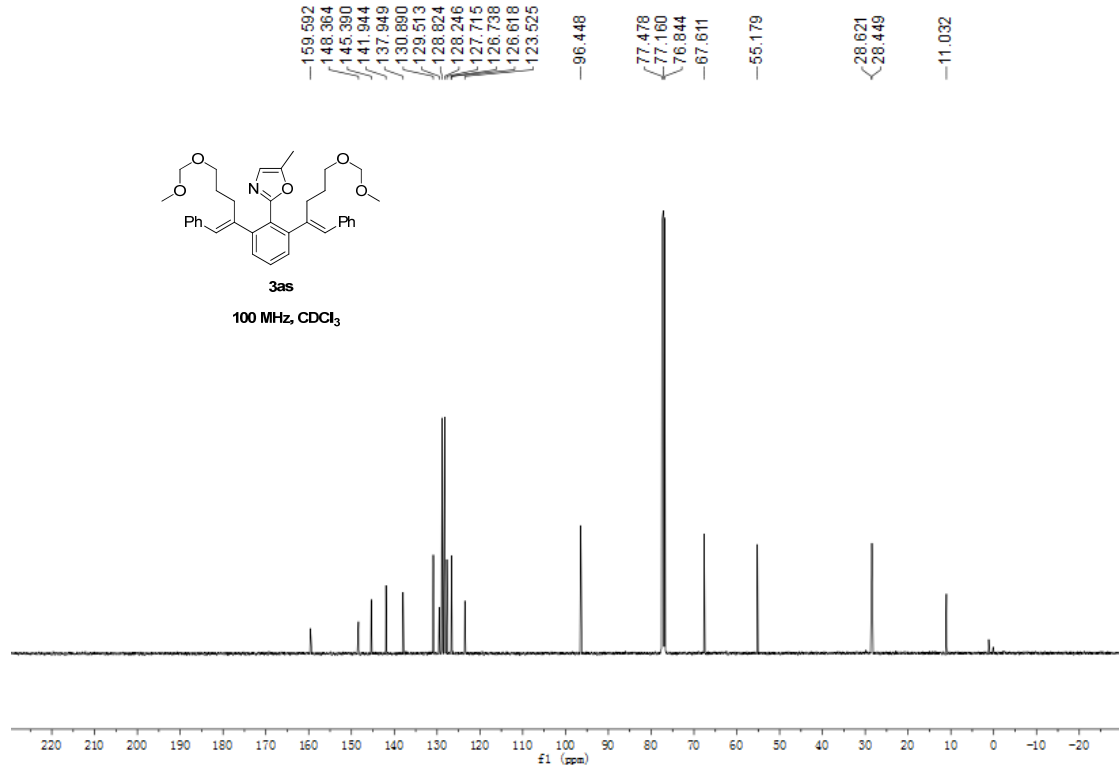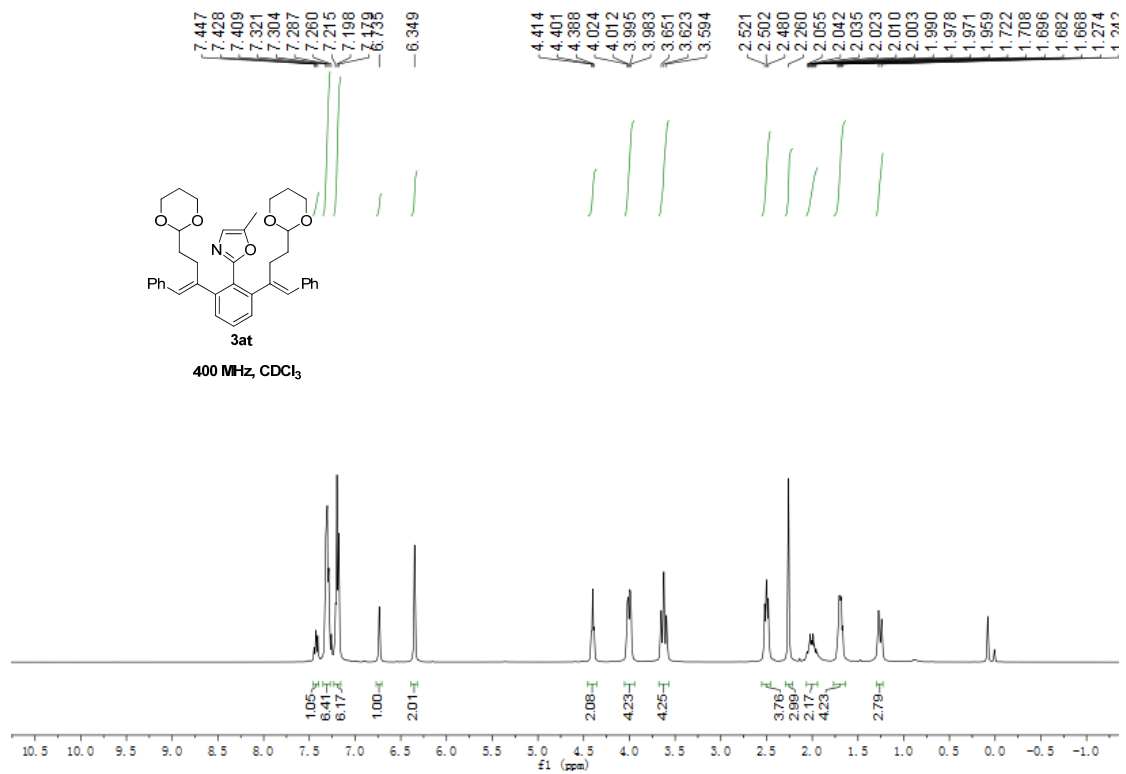



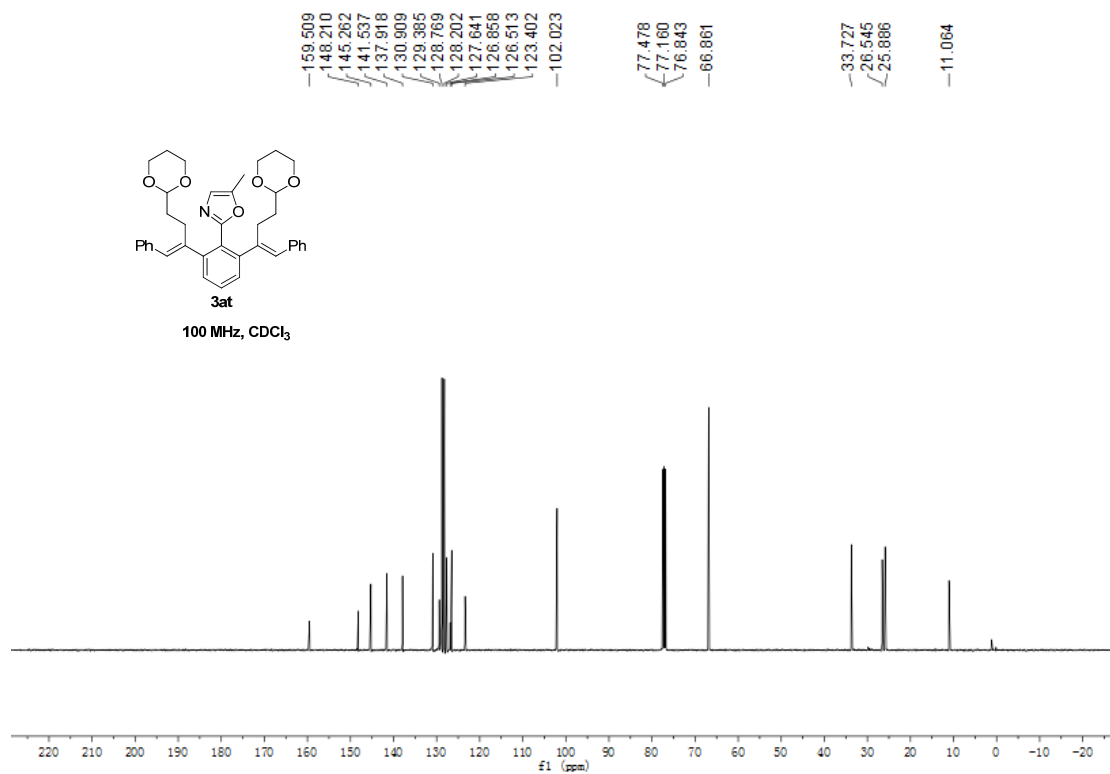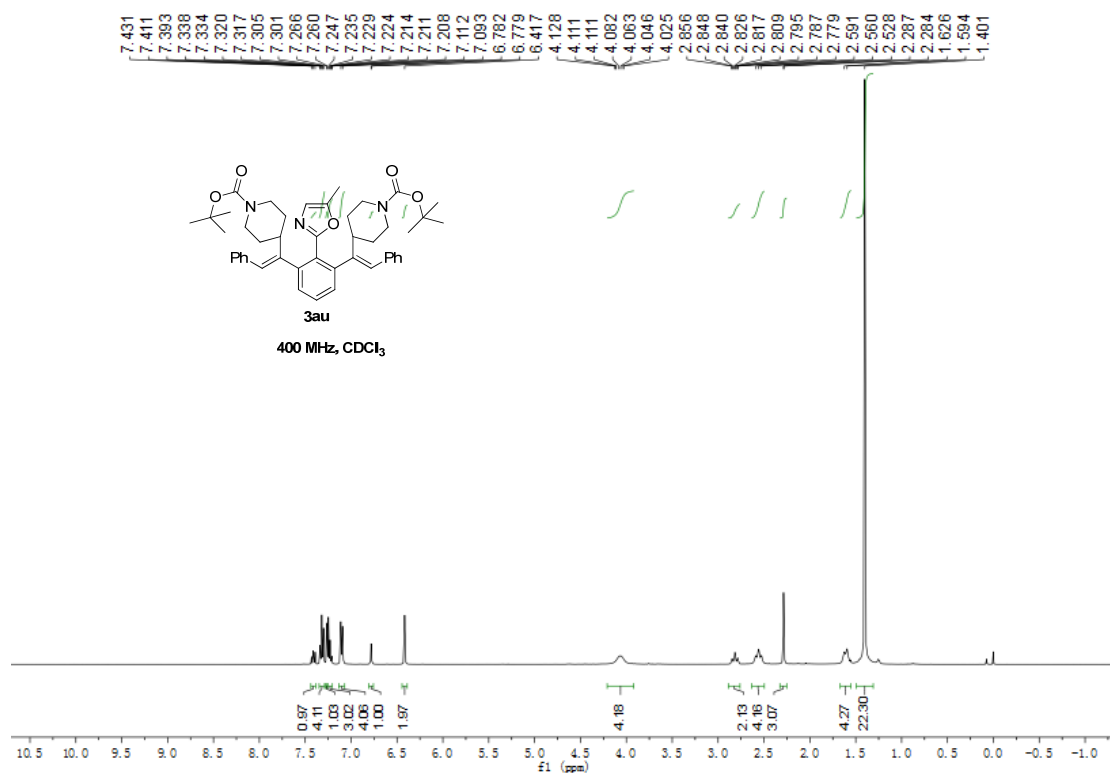

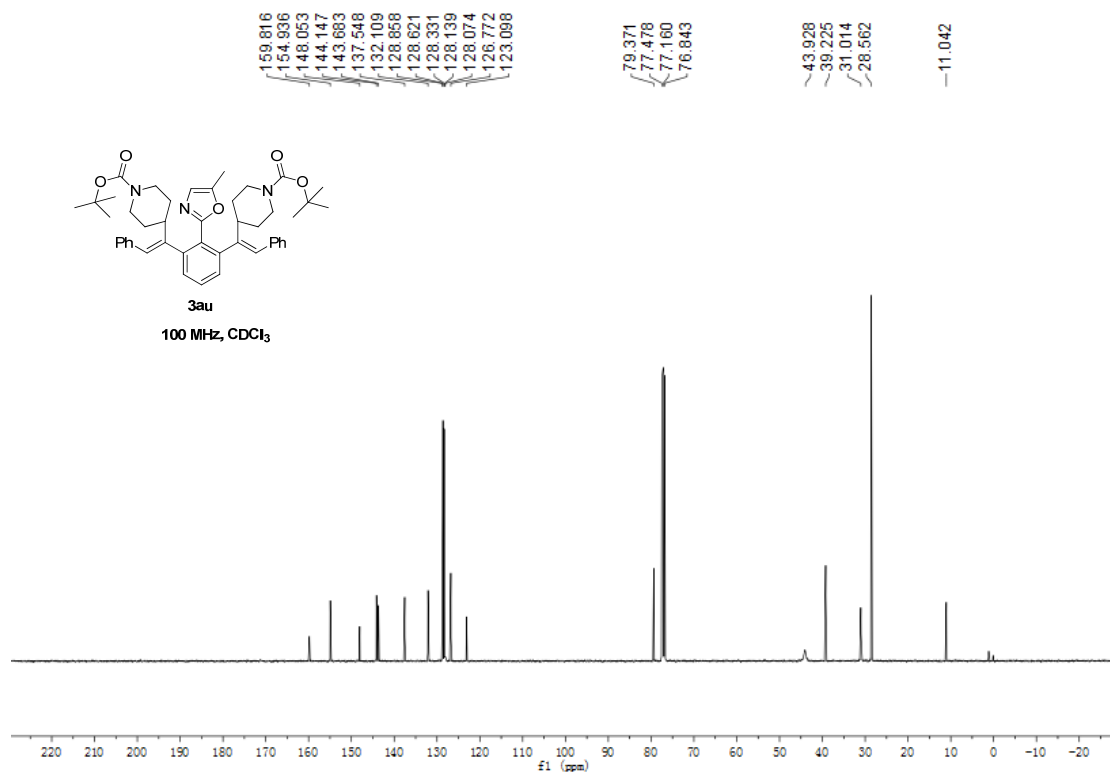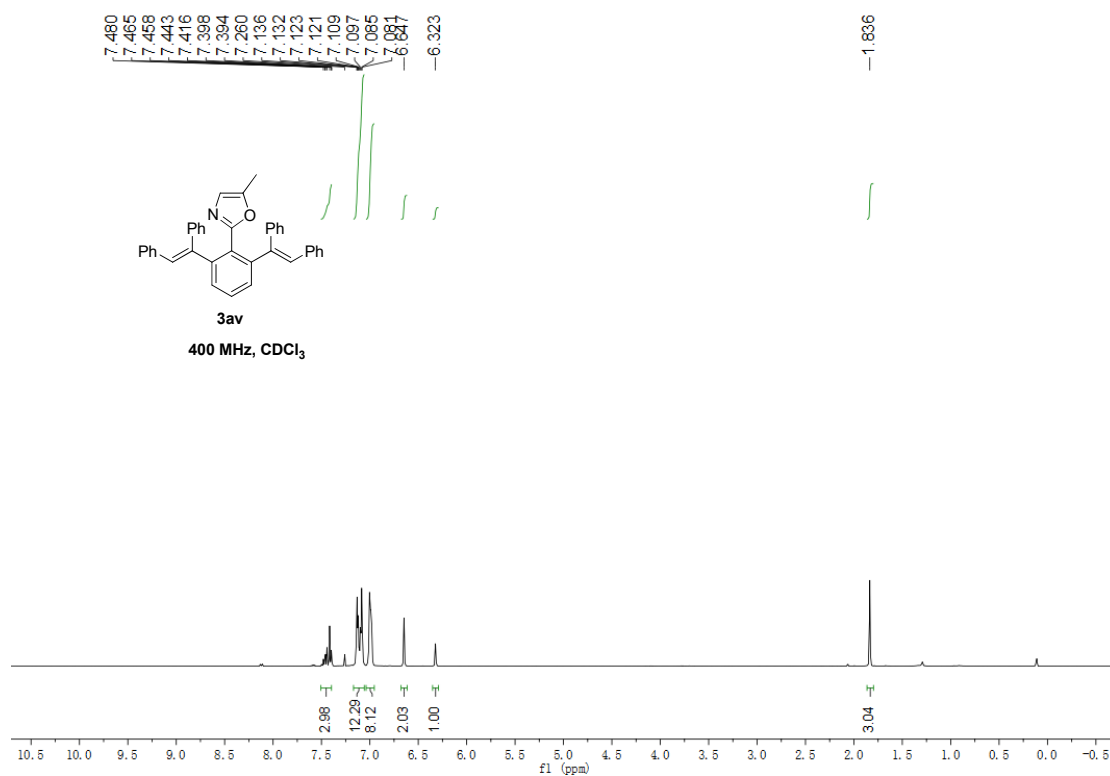

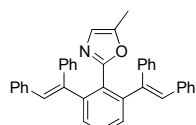

3av

100 MHz, CDCl<sub>3</sub>

159.025  
147.883  
146.401  
141.777  
139.915  
137.454  
130.735  
130.112  
129.576  
129.386  
127.977  
127.902  
126.814  
126.757  
123.027

77.478  
77.160  
76.842

-10.512

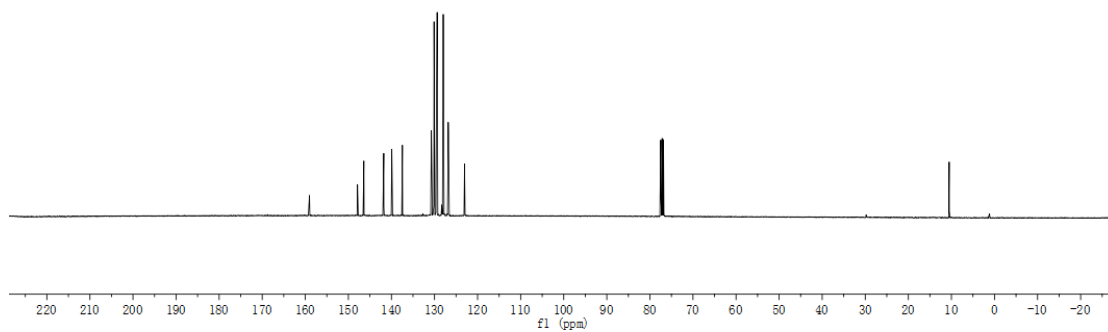

7.505  
7.486  
7.467  
7.356  
7.337  
7.319  
7.300  
7.260  
7.237  
7.219  
7.200  
7.171  
7.152  
6.811  
6.379

3.474  
3.459  
3.443

2.471  
2.452  
2.433  
2.308

1.644  
1.627  
1.608  
1.591  
1.574

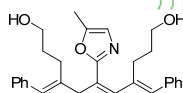

4

400 MHz, CDCl<sub>3</sub>

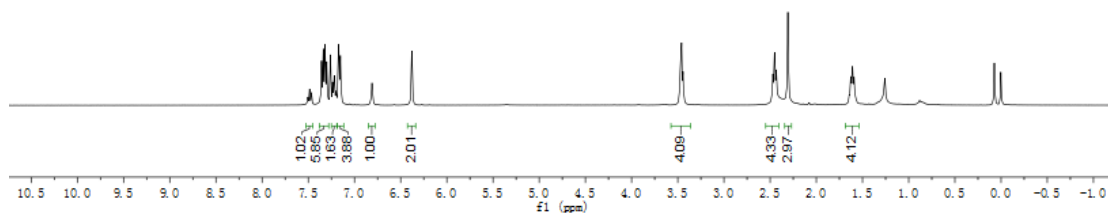

1.02  
5.85  
1.63  
3.88

1.00

2.01

4.09

4.33  
2.97

4.12

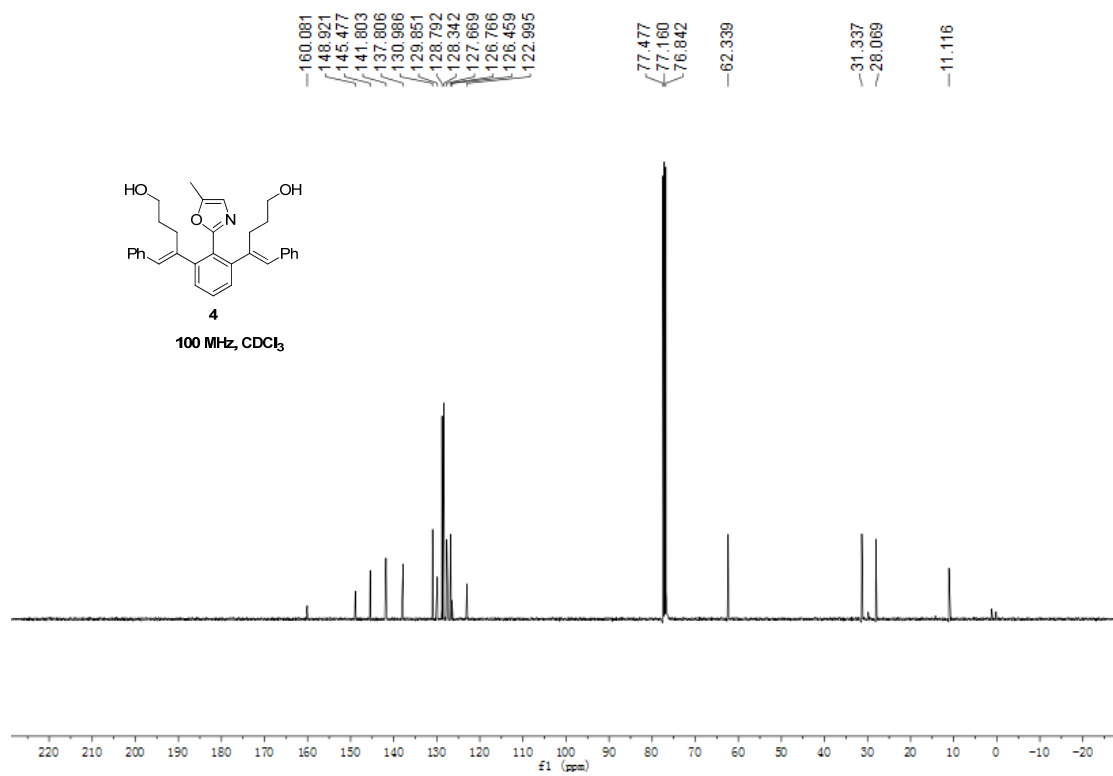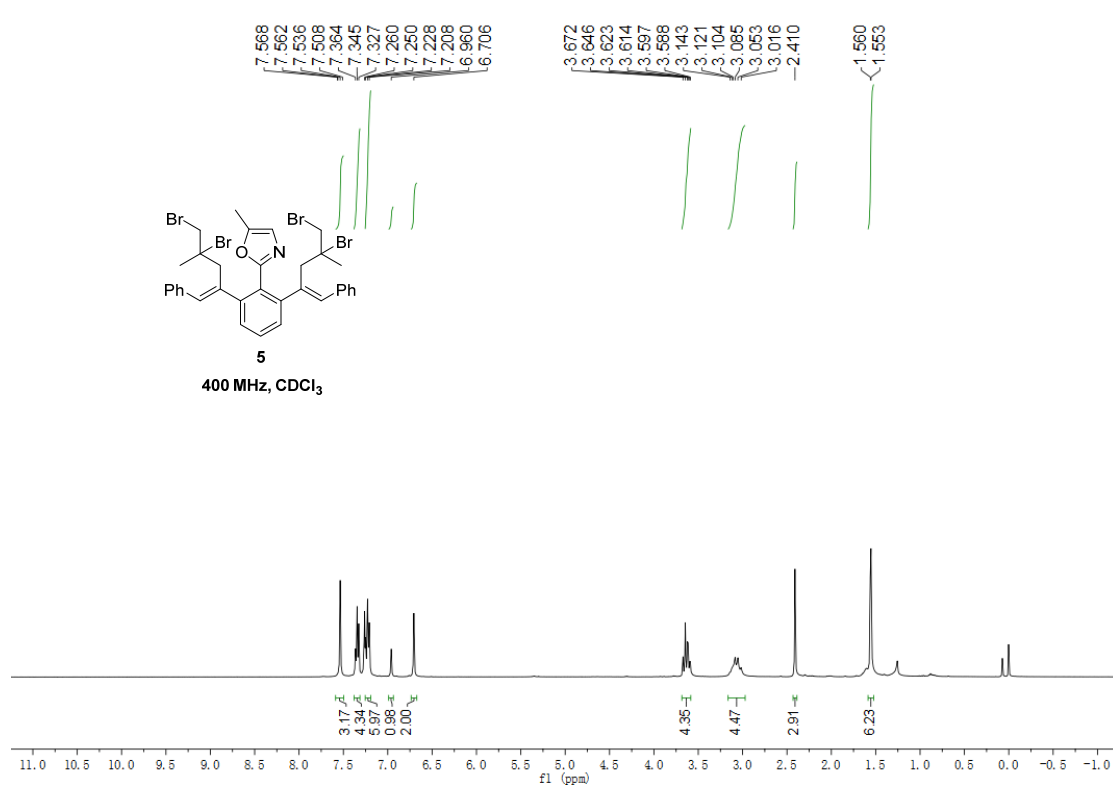

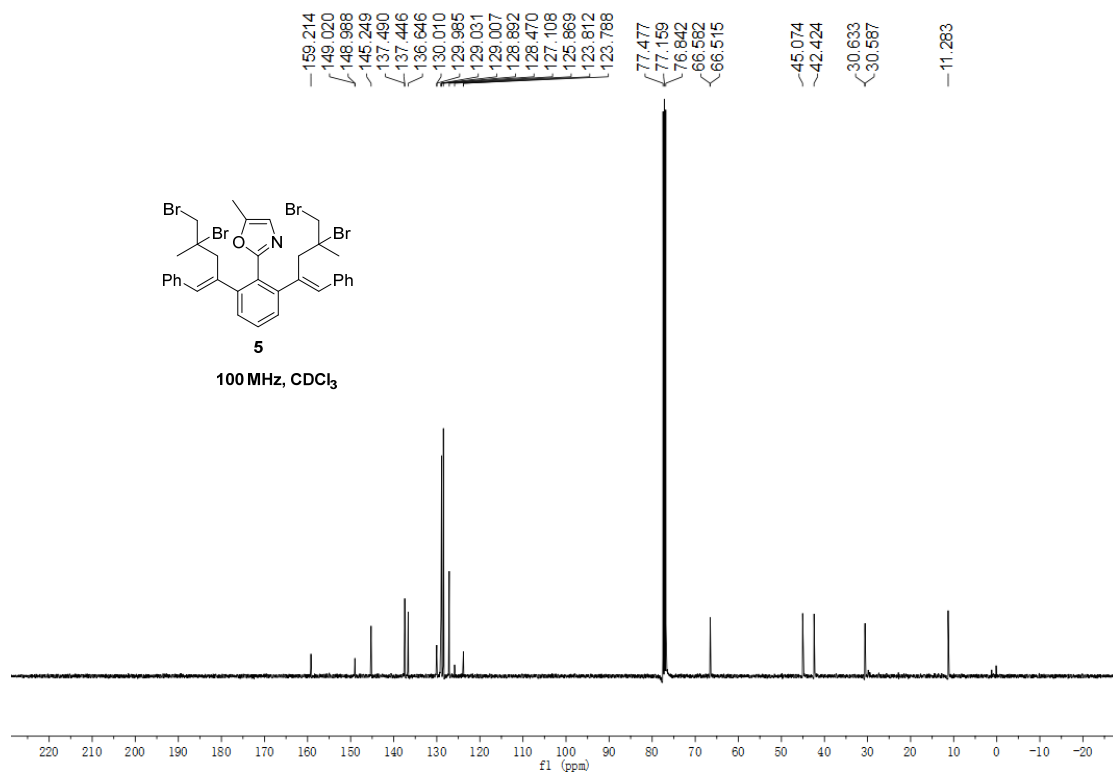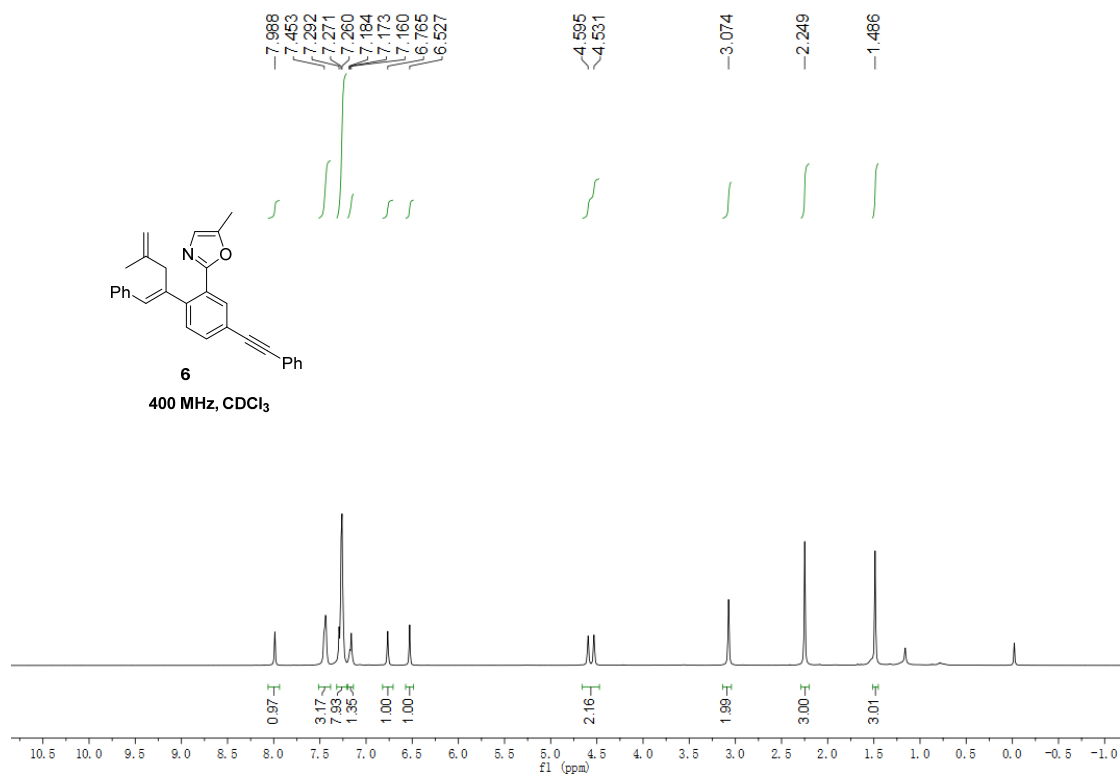

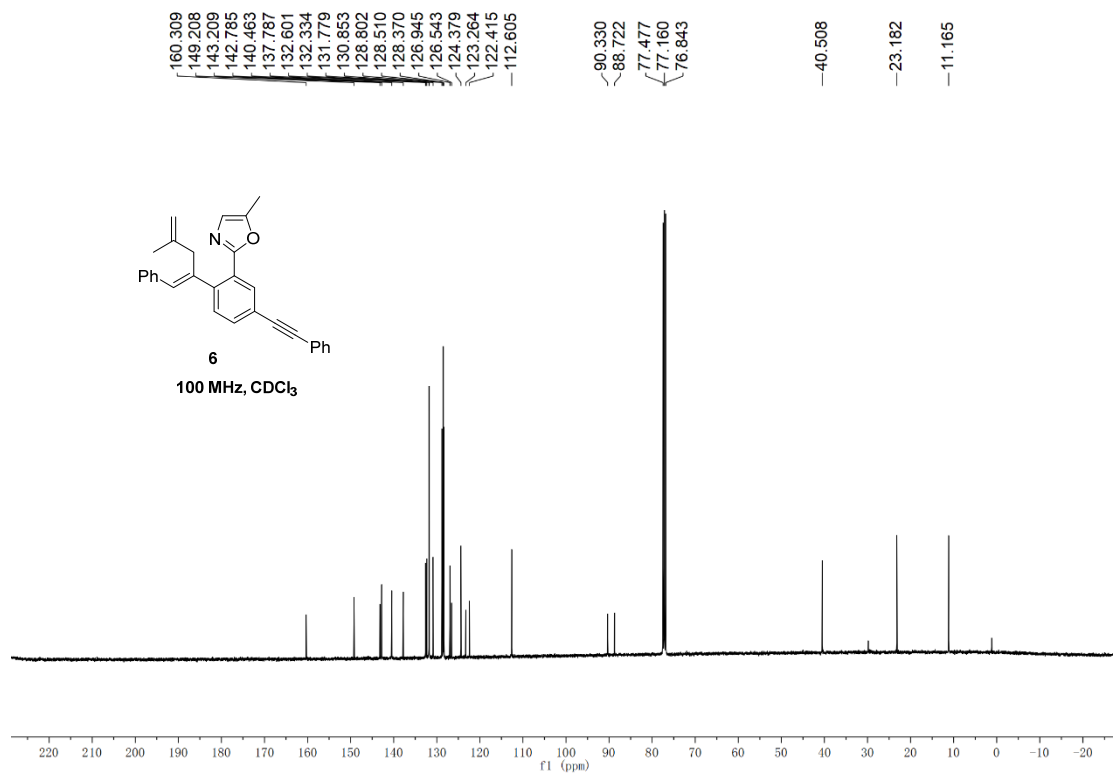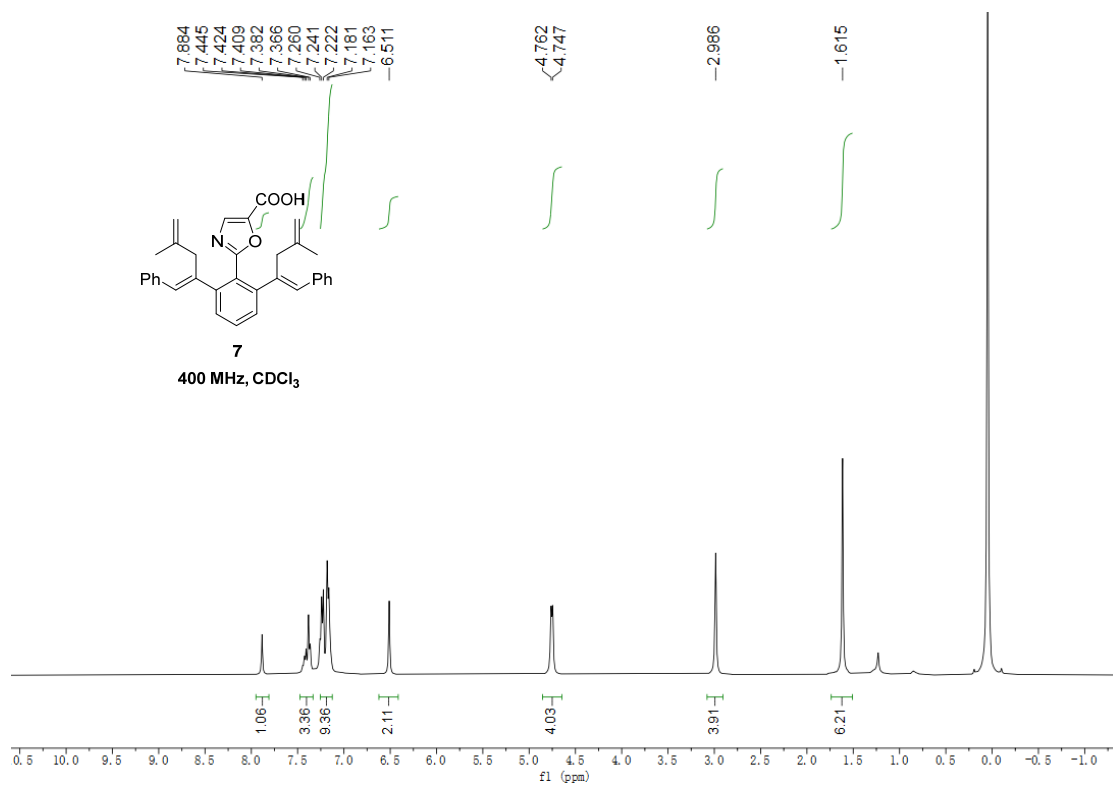

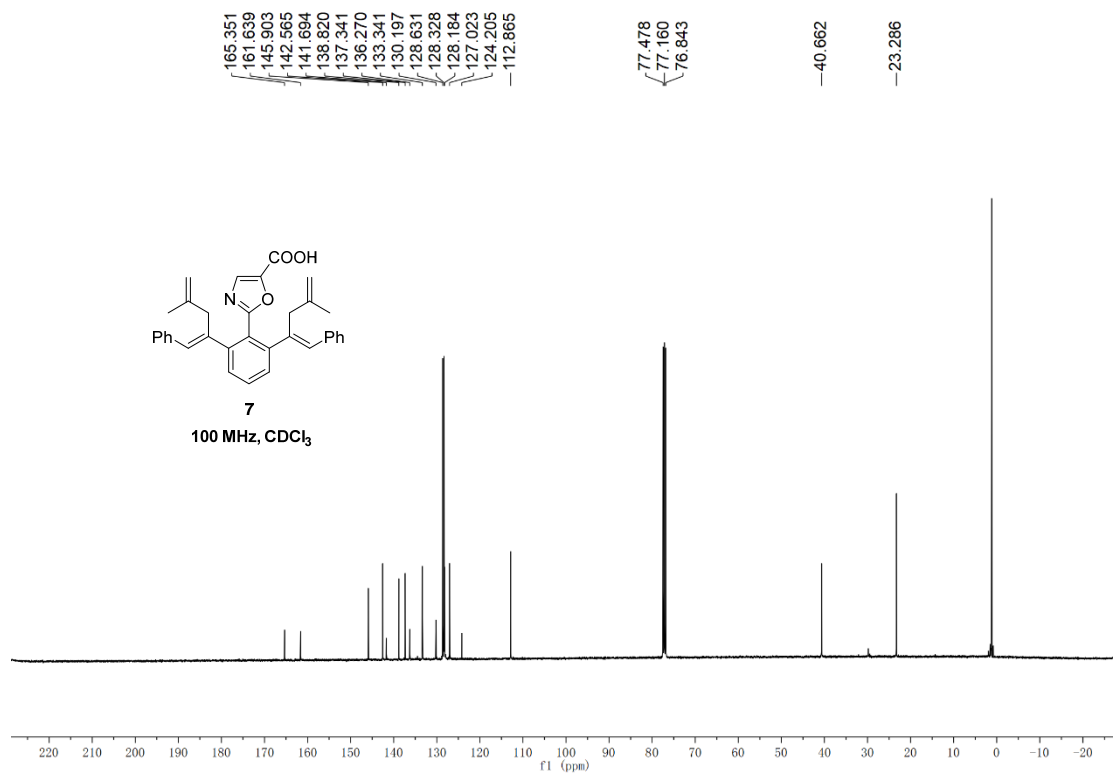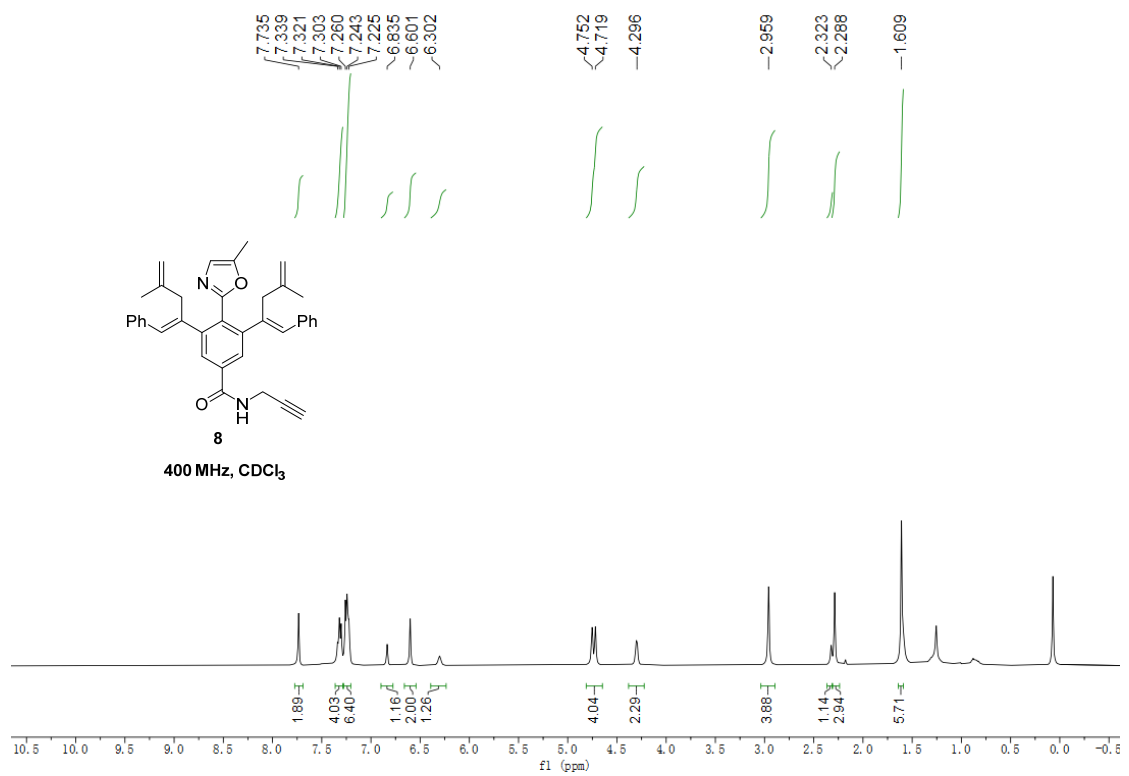

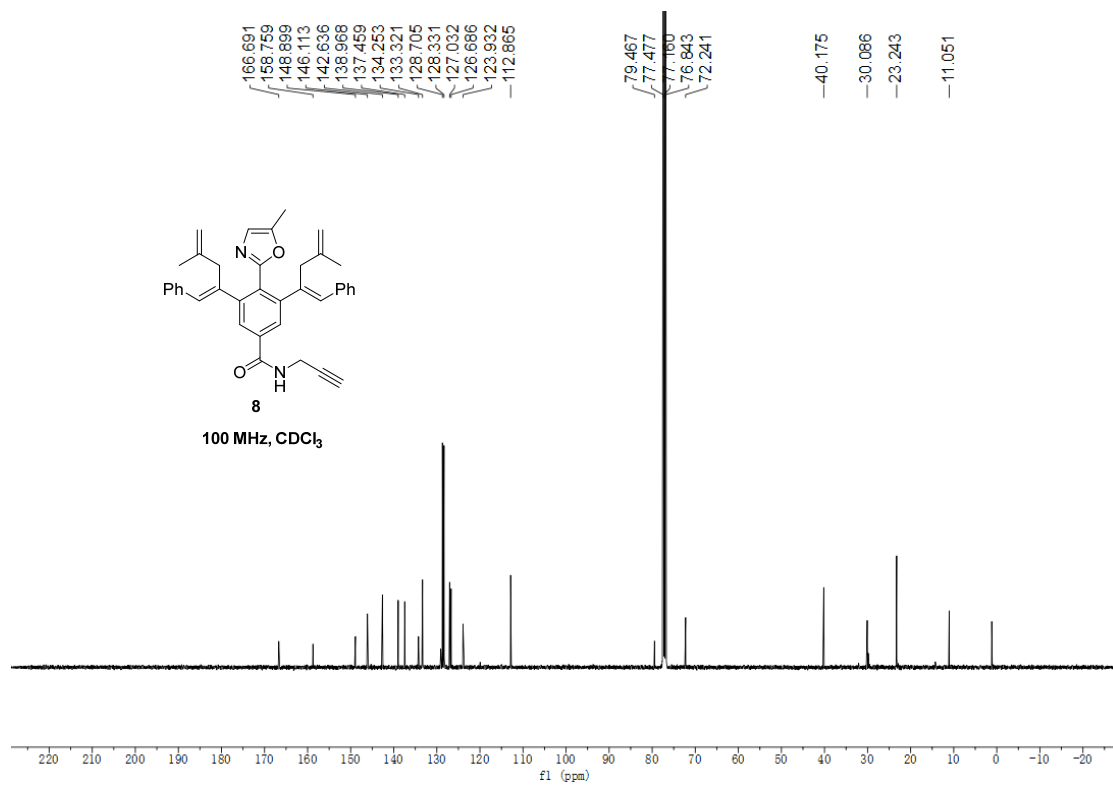

Supplement: d1ob00507c1.pdf [file d1ob00507c1.pdf]
